# Supplementary material
Source: PubMed Central journal article supplement (PMC4813714)
Supplement: 10.1074_O115.053843_mcp.O115.053843-1.pdf [file 10.1074_O115.053843_mcp.O115.053843-1.pdf]

## Supplemental Figure and Table Legends

**Supplemental Figure 1. Total ion current increases as a function of the number of multiple fills.** A trace of total fragment ion current obtained upon fragmenting  $[M+16H]^{16+}$  ions from recombinant H4 using a reaction time of 8 ms ETD, 20 ms IIPT as the number of multiple fragment ion fills is varied. Precursor m/z 703.4, 1  $\mu$ scan, r = 60,000, 1-20 multiple fills.

**Supplemental Figure 2. Hand-annotated ETD/IIPT MS/MS spectra from Figure 1.** Hand annotated MS/MS spectra of intact recombinant H4 (precursor charge state +16, m/z 703.40) following ETD (8 ms) and IIPT (20 ms) reactions with 1 and 20 fragment ion fills of the C-trap. Note, these are not exhaustive lists of fragments observed but rather those that are most abundant that are easily distinguishable. (A) Spectrum produced from a single iteration of ion/ion reactions (1 fill, 1  $\mu$ scan, r = 60,000 at 400 m/z, 0.56 sec elapsed scan time). (B) Spectrum produced from 20 iteration of ion/ion reactions (20 fills, 1  $\mu$ scan, r = 60,000 at 400 m/z, 6.24 sec elapsed scan time). (C) Spectrum produced by averaging 20 (A) spectra (1 fill, 1  $\mu$ scan, r = 60,000 at 400 m/z, 0.57 sec elapsed scan time/spectrum, 11.2 sec total acquisition time).

**Supplemental Figure 3. ETD/IIPT MS/MS spectra recorded on intact H4.** Precursor m/z 703.4, 1  $\mu$ scan, 15 multiple fills, r = 60,000, average of 5 spectra. (A) ETD spectrum recorded on  $[M+16H]^{16+}$  ions from recombinant H4 using a reaction time of 6 ms. (B) Spectrum obtained by performing 20 ms IIPT reaction on the ETD-produced fragment ions in A. Precursor m/z 703.4, 1  $\mu$ scan, 15 multiple fills, r = 60,000, average of 5 spectra, elapsed scan time 3.62 sec (ETD only) or 4.73 sec (ETD/IIPT).

**Supplemental Figure 4. Hand-annotated ETD/IPT MS/MS spectrum from Figure 2.**

ETD/IPT spectrum recorded on  $[M+19H]^{19+}$  ions from H2A type 1 (P0C0S8) using 4 ms ETD and 25 ms IPT. Precursor  $m/z$  738.0, 3  $\mu$ scans, 15 multiple-fills,  $r = 30,000$ , average of 6 spectra, 11.7 sec elapsed scan time/spectrum (~19.8 sec for single fill/transient equivalent spectrum). Note, these are not exhaustive lists of fragments observed but rather those that are most abundant that are easily distinguishable.

**Supplemental Figure 5. Full MS spectrum indicated unique proteoforms of intact H2A identified by MS/MS.**

Averaged, high resolution full MS spectrum depicting sample heterogeneity. Proteoforms identified by MS/MS are indicated. All PTMs were site-localized (K5).

**Supplemental Figure 6. Annotated ETD/IPT MS/MS spectrum of intact H4 proteoform.**

ETD/IPT spectrum recorded on  $[M+16H]^{16+}$  ions from H4 (P62805) containing 4 acetylated lysine residues (K4, K8, K12 and K16) along with K20 dimethylation using 4 ms ETD and 40 ms IPT. Precursor  $m/z$  718.0, 3  $\mu$ scans, 10 multiple-fills,  $r = 30,000$ , average of 8 spectra, 8.75 sec elapsed scan time/spectrum. The spectrum is renormalized to the largest peak in the subsection in increments of 250-750, depending on the density of the spectrum within each region. (A)  $m/z$  220-750 &  $m/z$  750-1250. (B)  $m/z$  1250-1500 & 1500-1750. (C)  $m/z$  1750-2000.

**Supplemental Figure 7. ETD/IPT MS/MS spectra recorded on intact H1 isoforms. (A)**

ETD/IPT spectrum recorded on  $[M+35H]^{35+}$  ions from H1.4 (P10412) using 2 ms ETD and 25

ms IIPT. Precursor m/z 623.1, 3 $\mu$ scans, 15 multiple fills, r = 30,000 average of 10 spectra, 11.6 sec elapsed scan time/spectrum. **(B)** Sequence coverage (~72%) obtained from MS/MS spectrum shown in **A**. **(C)** ETD/IIPT spectrum recorded on [M+36H]<sup>36+</sup> ions from H1.2 (P16403) using 2 ms ETD and 25 ms IIPT. Precursor m/z 609.0, 3 $\mu$ scans, 15 multiple fills, r = 30,000 average of 10 spectra, 11.6 sec elapsed scan time/spectrum. **(D)** Sequence coverage (~67%) obtained from MS/MS spectrum shown in **C**.

**Supplemental Figure 8. Hand-annotated ETD/IIPT MS/MS spectrum from Figure 4.** ETD/IIPT spectrum recorded on [M+23H]<sup>23+</sup> ions from H1.2 (P16403) with an undocumented single amino acid substitution (A141 $\rightarrow$ T) using 4 ms ETD and 20 ms IIPT. Precursor m/z 927.5, 1  $\mu$ scan, 25 multiple-fills, r = 100,000 at 400 m/z, average of 11 spectra, 9.38 sec elapsed scan time/spectrum (27.6 sec for single fill/transient equivalent spectrum). Note, these are not exhaustive lists of fragments observed but rather those that are most abundant that are easily distinguishable.

**Supplemental Figure 9. Expanded views of Figure 5 panel C.** Expanded views of the m/z regions where +8 species A-E (Table 1) should be observed upon isolation. The distinct 0.125 m/z shift indicative of a +8 is only clearly observed in panels **D** and **E** (corresponding to species D and E, accordingly).

**Supplemental Figure 10. Expanded view of m/z region containing intact histone H2B isoforms from Figure 5 panel D.** Expanded view of m/z 2730-2800 region MS/MS spectrum

produced upon isolation of ions possessing  $m/z$  790-830 and 140 ms IIPT with charge reduced precursor “parked” in the 2300-3900  $m/z$  range.

**Supplemental Figure 11. ETD/IIPT MS/MS spectrum recorded on truncated H2B proteoform.** (A) ETD/IIPT spectrum recorded on  $[M+15H]^{15+}$  ions from a truncated form of H2B (residues 26-125, possibly P62807) using 4 ms ETD and 40 ms IIPT. Precursor  $m/z$  747.3, 3 $\mu$ scans, 10 multiple fills,  $r = 30,000$  average of 5 spectra, 9.3 sec elapsed scan time/spectrum. (B) Sequence coverage (~90%) obtained from MS/MS spectrum shown in A.

**Supplemental Figure 12. ETD/IIPT MS/MS spectra recorded on truncated H2A proteoforms.** (A) ETD/IIPT spectrum recorded on  $[M+11H]^{11+}$  ions from truncated H2A2A (residues 57-129, Q6FI13) using 8 ms ETD and 40 ms IIPT. Precursor  $m/z$  733.7, 3 $\mu$ scans, 5 multiple fills,  $r = 30,000$ , average of 2 spectra, ~6.73 sec elapsed scan time/spectrum. Sequence coverage is also included. (B) ETD/IIPT spectrum recorded on  $[M+6H]^{6+}$  ions from truncated H2A (residues 1-45, possibly Q6FI13) using 8 ms ETD and 40 ms IIPT. Precursor  $m/z$  811.5, 3 $\mu$ scans, 5 multiple fills,  $r = 30,000$ , average of 2 spectra, ~6.41 sec elapsed scan time/spectrum. Sequence coverage is also included. (C) ETD/IIPT spectrum recorded on  $[M+6H]^{6+}$  ions from truncated H2A (residues 1-44, possibly Q6FI13) using 8 ms ETD and 40 ms IIPT. Precursor  $m/z$  799.5, 3 $\mu$ scans, 5 multiple fills,  $r = 30,000$ , average of 2 spectra, ~6.73 sec elapsed scan time/spectrum. Sequence coverage is also included. For all spectra, green circles indicate neutral losses from charge reduced precursor. Blue circles indicate other species that were co-isolated and charge reduced.

**Supplemental Figure 13. LC-MS characterization of *in vitro* clipping of histone H2A type**

**2A.** (A) Extracted LC-MS chromatogram of (left) intact histone H2A and (right) clipped histone H2A after 15 min, 30 min and 1 hour of incubation with Cathepsin L. In italic above the peaks the area under the curve of the ion chromatogram. (B) Quantification of the C-terminal histone H2A peptides identified in the in-vitro experiment. The cleavage site is determined in the y-axis, including the intact protein form (full). The abundance is expressed in arbitrary units (AU), corresponding to the area under the curve of the extracted ion chromatogram. (C) Annotated MS/MS ETD spectrum of the G44 clipped histone H2A, deconvoluted using Xtract (Thermo). c and z fragments are marked with orange and yellow labels. On the right of the spectrum the signal of the intact peptide not fragmented. These data were acquired on an Orbitrap Fusion with FETD.

**Supplemental Table 1. N-terminal truncated histones observed in H2A1 fraction from butyrate treated HeLa cells.** Sequences of observed truncated H2A proteoforms are given along with their respective residue numbers and quantitation expressed in arbitrary units corresponding to the calculated area of the extracted ion chromatogram.

**Supplemental Table 2. Identified peptides from the in-vitro histone H2A proteolytic digestion.** Peptide sequences of the peptides identified using Mascot database searching (Matrix Science). The protein/peptide sequence is annotated with the respective mass (MH<sup>+</sup>) and cleavage site. The cleavage site is annotated in the Motif column as “-“ with the surrounding  $\pm 6$  amino acid residues. Quantification is expressed in arbitrary units, corresponding to the

calculated area of the extracted ion chromatogram. Prior both database searching and LC peak area integration the raw files were deconvoluted using Xtract (Thermo).

Supplemental Figure 1

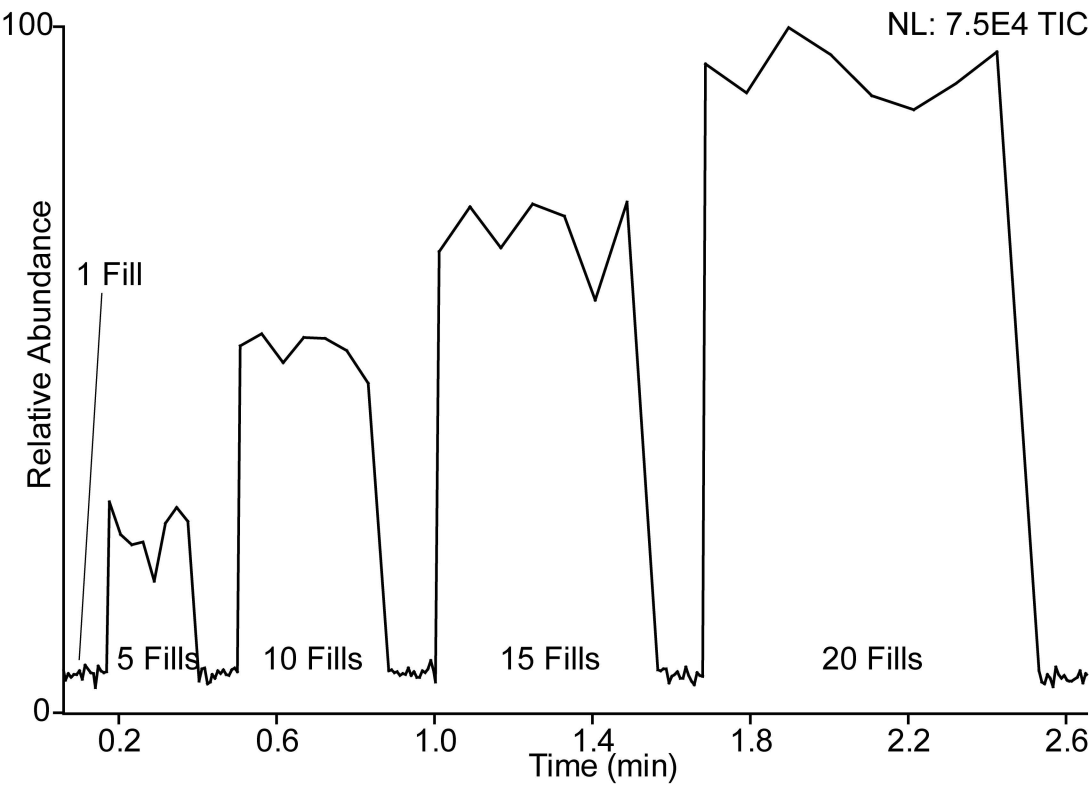

Supplemental Figure 2A

A

062515 SAU Recomb H4 Infusion Var Fills ETD8 PTR20 Elite #11 RT: 0.07 AV: 1 NL: 3.93E4  
T: FTMS + p NSI Full ms2 703.40@etd8.00@ptr20.00 [190.00-2000.00]

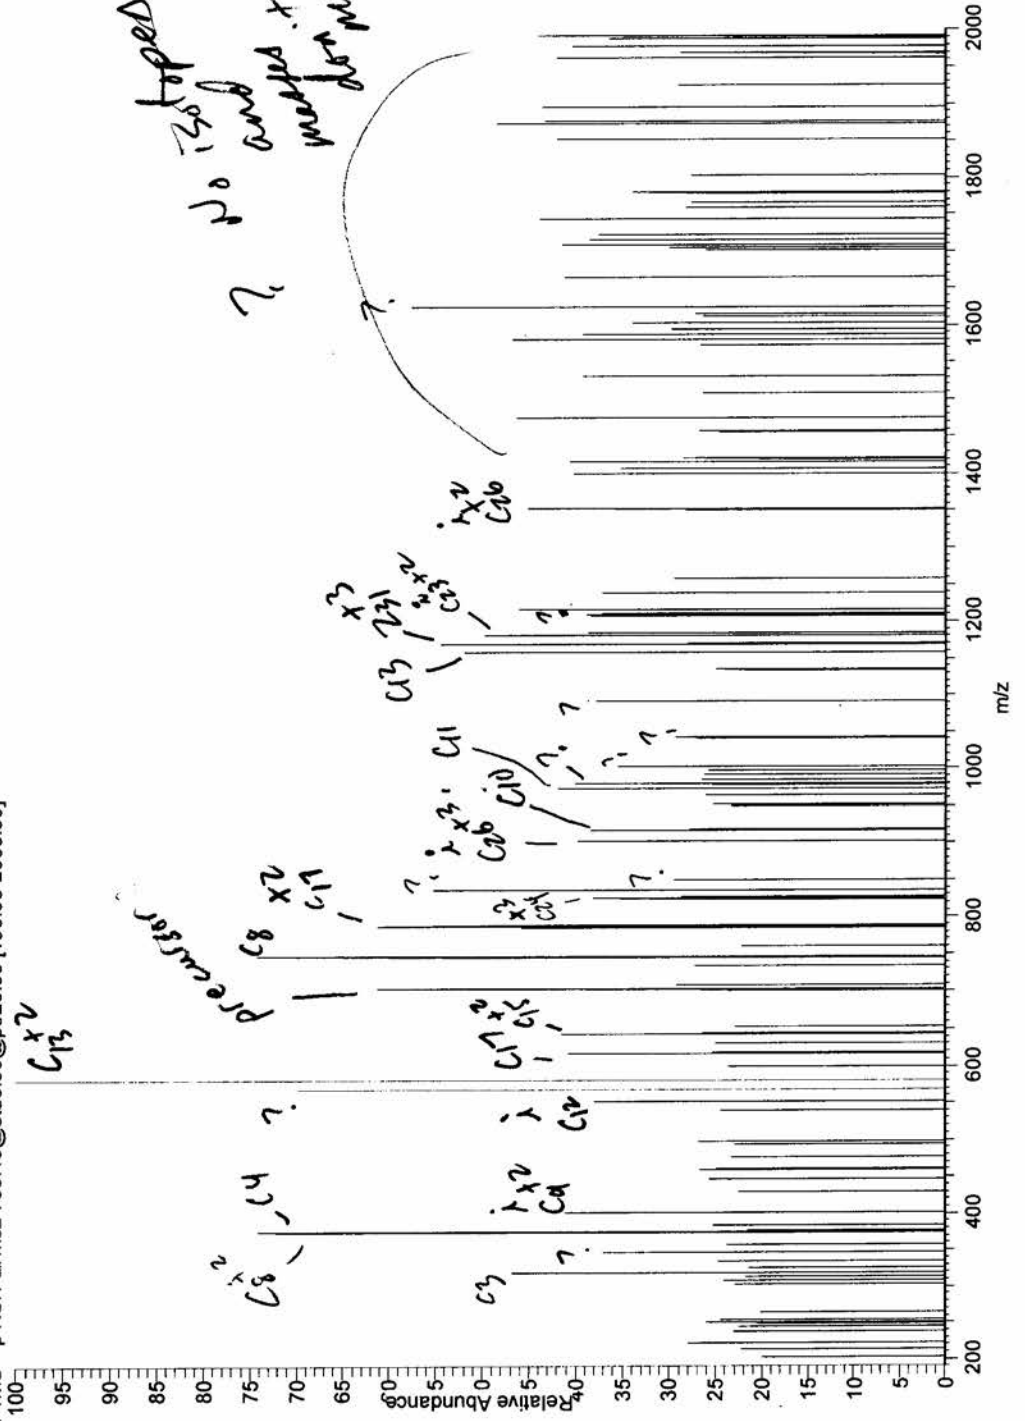

i meant mass  
is +1  
higher  
0'  
there is  
no isotop  
pk to  
confirm  
change  
state

? no isotopes  
marked. x  
do not match



062515\_SAU\_Recom\_H4\_Infusion\_Var\_Fills\_ETD8\_PTR20\_Elite #11 RT: 0.07 AV: 1 NL: 3.93E4  
T: FTMS + p NSI Full ms2 703.40@etd8.00@ptr20.00 [190.00-2000.00]

C13 x2

A

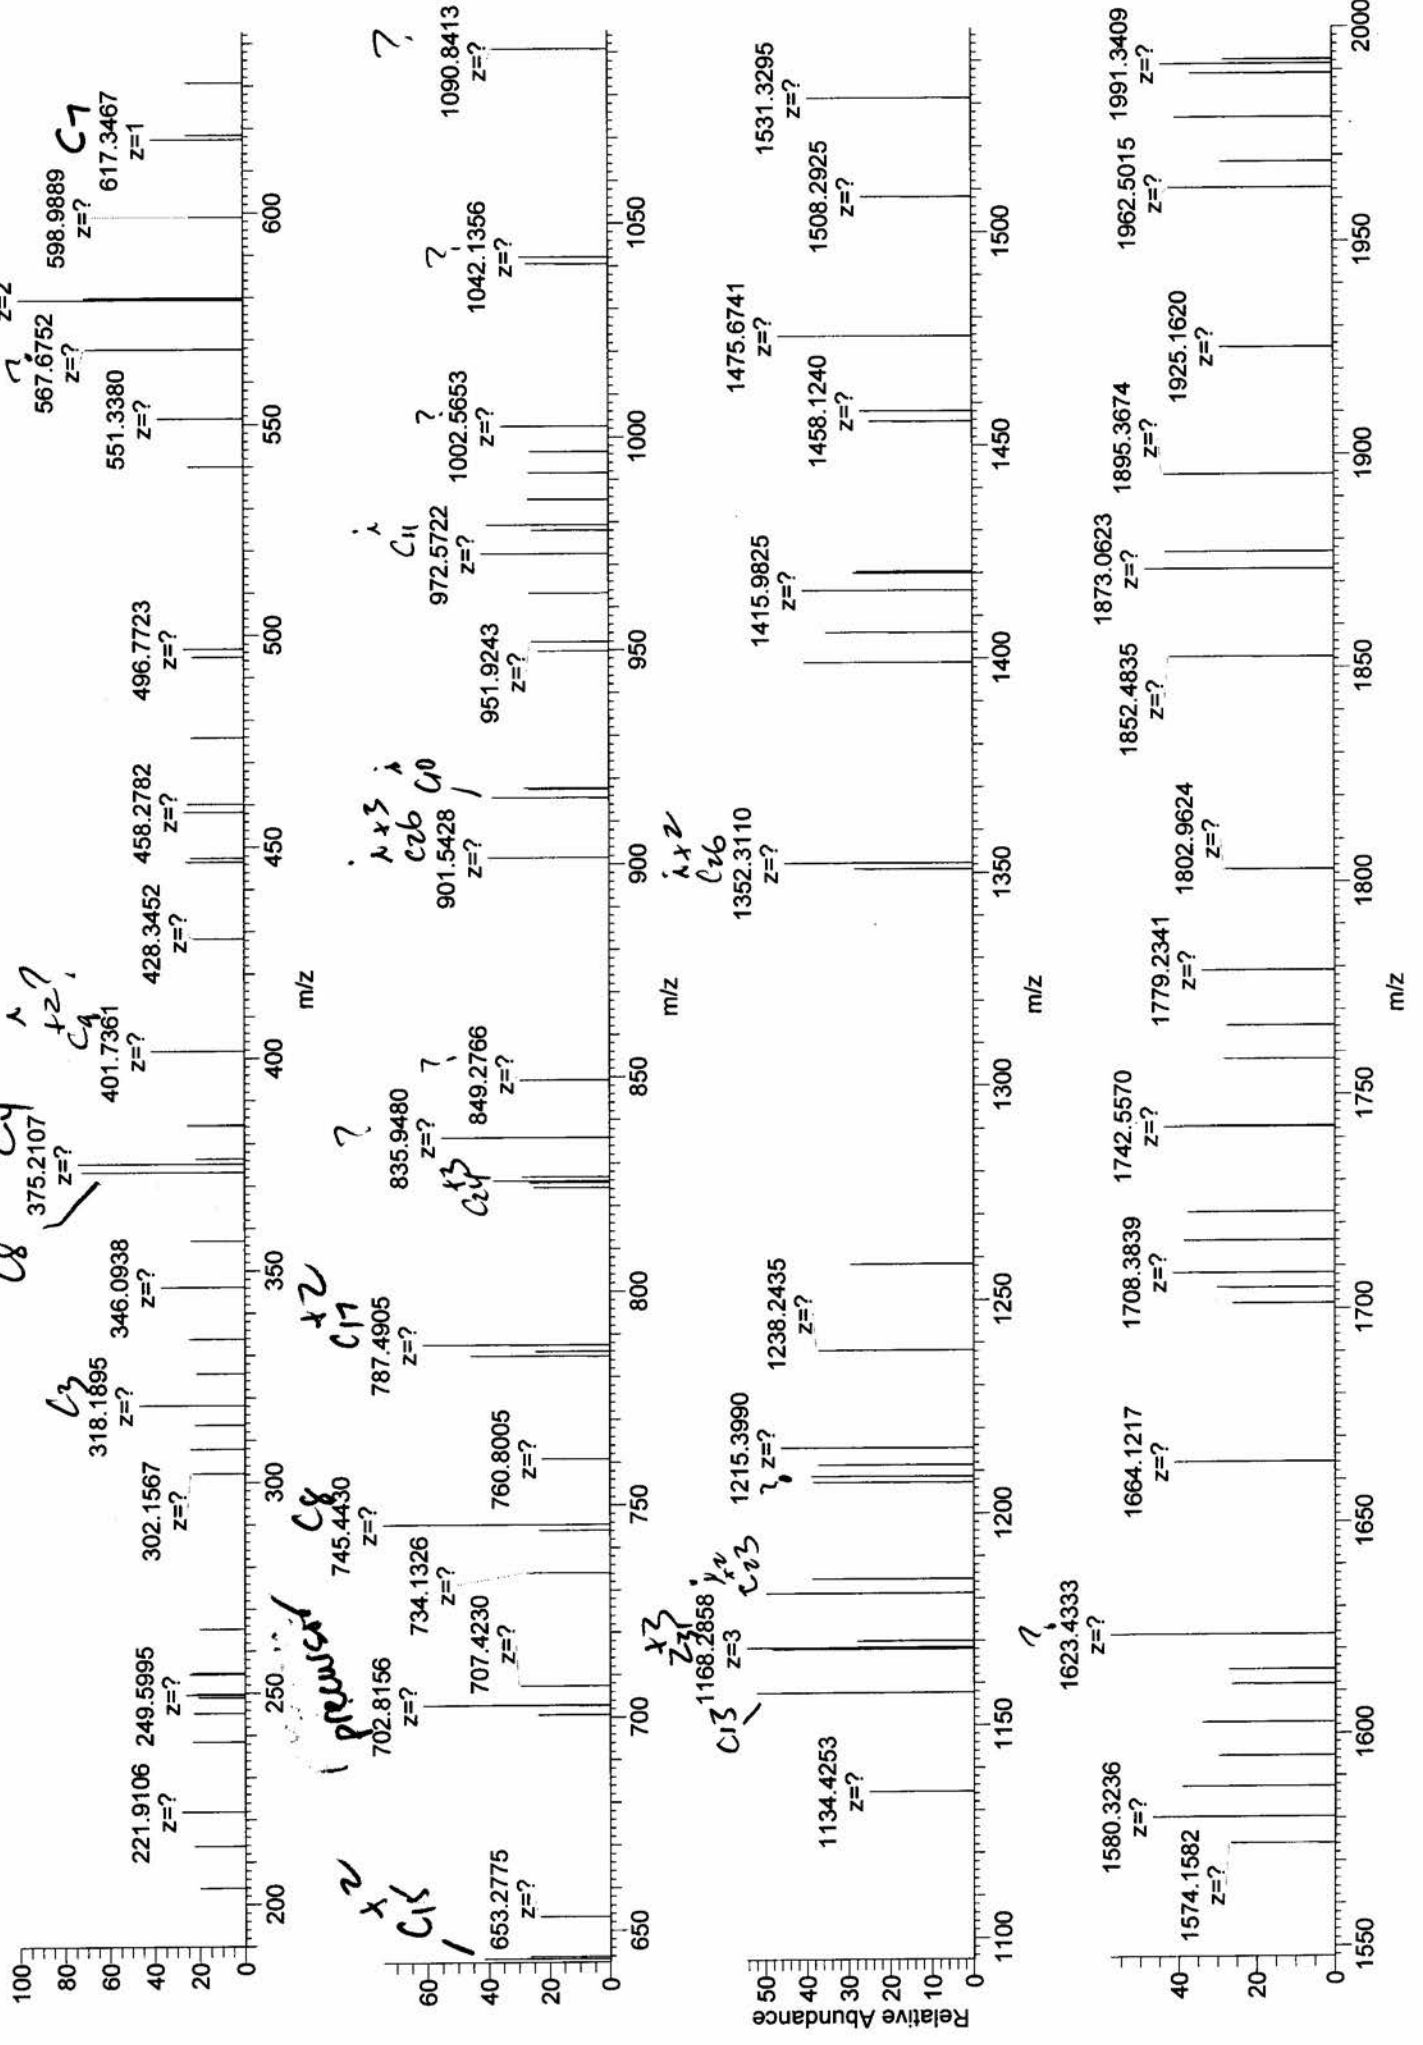

A

## Fragment Masses

| +3 c ions | +2 c ions  | +1 c ions  |     | Sequence |     | +1 z ions  | +2 z ions | +3 z ions |
|-----------|------------|------------|-----|----------|-----|------------|-----------|-----------|
| 35.6935   | 53.0366    | 105.0659   | 1   | S        | 102 | 11230.3485 | 5615.6779 | 3744.1210 |
| 54.7006   | 81.5473    | 162.0873   | 2   | G        | 101 | 11127.2978 | 5564.1525 | 3709.7708 |
| 106.7343  | 159.5979   | 318.1884   | ✓3  | R        | 100 | 11070.2763 | 5535.6418 | 3690.7636 |
| 125.7415  | 188.1086   | 375.2099   | ✓4  | G        | 99  | 10914.1752 | 5457.5912 | 3638.7299 |
| 168.4398  | 252.1561   | 503.3049   | 5   | K        | 98  | 10857.1538 | 5429.0805 | 3619.7228 |
| 187.4470  | 280.6668   | 560.3263   | 6   | G        | 97  | 10729.0588 | 5365.0330 | 3577.0244 |
| 206.4541  | 309.1775   | 617.3478   | ✓7  | G        | 96  | 10672.0373 | 5336.5223 | 3558.0173 |
| 249.1524  | 373.2250   | ✓745.4427  | ✓8  | K        | 95  | 10615.0159 | 5308.0116 | 3539.0101 |
| 268.1596  | 401.7357   | ✓802.4642  | 9   | G        | 94  | 10486.9209 | 5243.9641 | 3496.3118 |
| 305.8543  | 458.2778   | 915.5483   | ✓10 | L        | 93  | 10429.8994 | 5215.4534 | 3477.3047 |
| 324.8614  | 486.7885   | 972.5697   | ✓11 | G        | 92  | 10316.8154 | 5158.9113 | 3439.6100 |
| 367.5598  | 550.8360   | ✓1100.6647 | 12  | K        | 91  | 10259.7939 | 5130.4006 | 3420.6028 |
| 386.5669  | 579.3467   | ✓1157.6862 | ✓13 | G        | 90  | 10131.6989 | 5066.3531 | 3377.9045 |
| 405.5741  | 607.8575   | 1214.7076  | 14  | G        | 89  | 10074.6775 | 5037.8424 | 3358.8973 |
| 429.2531  | 643.3760   | ✓1285.7447 | 15  | A        | 88  | 10017.6560 | 5009.3316 | 3339.8902 |
| 471.9514  | 707.4235   | 1413.8397  | 16  | K        | 87  | 9946.6189  | 4973.8131 | 3316.2112 |
| 523.9851  | 785.4740   | ✓1569.9408 | 17  | R        | 86  | 9818.5239  | 4909.7656 | 3273.5128 |
| 569.6714  | 854.0035   | 1706.9997  | 18  | H        | 85  | 9662.4228  | 4831.7151 | 3221.4791 |
| 621.7051  | 932.0541   | 1863.1008  | 19  | R        | 84  | 9525.3639  | 4763.1856 | 3175.7928 |
| 664.4035  | 996.1015   | 1991.1958  | 20  | K        | 83  | 9369.2628  | 4685.1350 | 3123.7591 |
| 697.4263  | 1045.6357  | 2090.2642  | 21  | V        | 82  | 9241.1678  | 4621.0876 | 3081.0608 |
| 735.1209  | 1102.1778  | 2203.3483  | 22  | L        | 81  | 9142.0994  | 4571.5534 | 3048.0380 |
| 787.1546  | 1180.2283  | ✓2359.4494 | 23  | R        | 80  | 9029.0154  | 4515.0113 | 3010.3433 |
| 825.4970  | ✓1237.7418 | 2474.4763  | 24  | D        | 79  | 8872.9143  | 4436.9608 | 2958.3096 |
| 863.5113  | 1294.7633  | 2588.5193  | 25  | N        | 78  | 8757.8873  | 4379.4473 | 2919.9673 |
| 901.2060  | ✓1351.3053 | 2701.6033  | 26  | I        | 77  | 8643.8444  | 4322.4258 | 2881.9530 |
| 943.8922  | 1415.3346  | 2829.6619  | 27  | Q        | 76  | 8530.7603  | 4265.8838 | 2844.2583 |
| 962.8993  | 1443.8453  | 2886.6834  | 28  | G        | 75  | 8402.7017  | 4201.8545 | 2801.5721 |
| 1000.5940 | 1500.3874  | 2999.7674  | 29  | I        | 74  | 8345.6803  | 4173.3438 | 2782.5649 |
| 1034.2766 | 1550.9112  | 3100.8151  | 30  | T        | 73  | 8232.5962  | 4116.8017 | 2744.8703 |
| 1076.9749 | 1614.9587  | 3228.9101  | 31  | K        | 72  | 8131.5485  | 4066.2779 | 2711.1877 |
| 1109.3258 | 1663.4851  | 3325.9628  | 32  | P        | 71  | 8003.4536  | 4002.2304 | 2668.4894 |
| 1133.0048 | 1699.0036  | 3397.0000  | 33  | A        | 70  | 7906.4008  | 3953.7040 | 2636.1385 |
| 1170.6995 | 1755.5456  | 3510.0840  | 34  | I        | 69  | 7835.3637  | 3918.1855 | 2612.4594 |
| 1222.7332 | 1833.5962  | 3666.1851  | 35  | R        | 68  | 7722.2796  | 3861.6435 | 2574.7647 |
| 1274.7669 | 1911.6468  | 3822.2862  | 36  | R        | 67  | 7566.1785  | 3783.5929 | 2522.7310 |
| 1312.4616 | 1968.1888  | 3935.3703  | 37  | L        | 66  | 7410.0774  | 3705.5423 | 2470.6973 |
| 1336.1407 | 2003.7073  | 4006.4074  | 38  | A        | 65  | 7296.9933  | 3649.0003 | 2433.0026 |
| 1388.1744 | 2081.7579  | 4162.5085  | 39  | R        | 64  | 7225.9562  | 3613.4818 | 2409.3236 |
| 1440.2081 | 2159.8085  | 4318.6096  | 40  | R        | 63  | 7069.8551  | 3535.4312 | 2357.2899 |
| 1459.2152 | 2188.3192  | 4375.6311  | 41  | G        | 62  | 6913.7540  | 3457.3806 | 2305.2562 |
| 1478.2224 | 2216.8299  | 4432.6526  | 42  | G        | 61  | 6856.7325  | 3428.8699 | 2286.2490 |
| 1511.2452 | 2266.3641  | 4531.7210  | 43  | V        | 60  | 6799.7111  | 3400.3592 | 2267.2419 |
| 1553.9435 | 2330.4116  | 4659.8159  | 44  | K        | 59  | 6700.6427  | 3350.8250 | 2234.2191 |
| 1605.9772 | 2408.4622  | 4815.9171  | 45  | R        | 58  | 6572.5477  | 3286.7775 | 2191.5208 |
| 1643.6719 | 2465.0042  | 4929.0011  | 46  | I        | 57  | 6416.4466  | 3208.7269 | 2139.4870 |
| 1672.6826 | 2508.5202  | 5016.0332  | 47  | S        | 56  | 6303.3625  | 3152.1849 | 2101.7924 |
| 1691.6897 | 2537.0309  | 5073.0546  | 48  | G        | 55  | 6216.3305  | 3108.6689 | 2072.7817 |
| 1729.3844 | 2593.5730  | 5186.1387  | 49  | L        | 54  | 6159.3090  | 3080.1582 | 2053.7745 |
| 1767.0791 | 2650.1150  | 5299.2227  | 50  | I        | 53  | 6046.2250  | 3023.6161 | 2016.0798 |
| 1821.4335 | 2731.6467  | 5462.2861  | 51  | Y        | 52  | 5933.1409  | 2967.0741 | 1978.3852 |

Supplemental Figure 2A (cont)

A

## Fragment Masses

| +3 c ions | +2 c ions | +1 c ions  |     | Sequence |    | +1 z ions | +2 z ions | +3 z ions |
|-----------|-----------|------------|-----|----------|----|-----------|-----------|-----------|
| 1864.4477 | 2796.1680 | 5591.3287  | 52  | E        | 51 | 5770.0776 | 2885.5424 | 1924.0307 |
| 1907.4619 | 2860.6893 | 5720.3713  | 53  | E        | 50 | 5641.0350 | 2821.0211 | 1881.0165 |
| 1941.1445 | 2911.2131 | 5821.4189  | 54  | T        | 49 | 5511.9924 | 2756.4998 | 1838.0023 |
| 1993.1782 | 2989.2637 | 5977.5200  | 55  | R        | 48 | 5410.9447 | 2705.9760 | 1804.3198 |
| 2012.1854 | 3017.7744 | 6034.5415  | 56  | G        | 47 | 5254.8436 | 2627.9254 | 1752.2860 |
| 2045.2082 | 3067.3086 | 6133.6099  | 57  | V        | 46 | 5197.8221 | 2599.4147 | 1733.2789 |
| 2082.9028 | 3123.8506 | 6246.6940  | 58  | L        | 45 | 5098.7537 | 2549.8805 | 1700.2561 |
| 2125.6012 | 3187.8981 | 6374.7890  | 59  | K        | 44 | 4985.6697 | 2493.3385 | 1662.5614 |
| 2158.6240 | 3237.4323 | 6473.8574  | 60  | V        | 43 | 4857.5747 | 2429.2910 | 1619.8631 |
| 2207.6468 | 3310.9665 | 6620.9258  | 61  | F        | 42 | 4758.5063 | 2379.7568 | 1586.8403 |
| 2245.3415 | 3367.5086 | 6734.0098  | 62  | L        | 41 | 4611.4379 | 2306.2226 | 1537.8175 |
| 2288.3557 | 3432.0299 | 6863.0524  | 63  | E        | 40 | 4498.3538 | 2249.6805 | 1500.1228 |
| 2326.3700 | 3489.0513 | 6977.0954  | 64  | N        | 39 | 4369.3112 | 2185.1592 | 1457.1086 |
| 2359.3928 | 3538.5855 | 7076.1638  | 65  | V        | 38 | 4255.2683 | 2128.1378 | 1419.0943 |
| 2397.0875 | 3595.1276 | 7189.2478  | 66  | I        | 37 | 4156.1999 | 2078.6036 | 1386.0715 |
| 2449.1212 | 3673.1781 | 7345.3490  | 67  | R        | 36 | 4043.1158 | 2022.0615 | 1348.3768 |
| 2487.4635 | 3730.6916 | 7460.3759  | 68  | D        | 35 | 3887.0147 | 1944.0110 | 1296.3431 |
| 2511.1425 | 3766.2101 | 7531.4130  | 69  | A        | 34 | 3771.9877 | 1886.4975 | 1258.0008 |
| 2544.1653 | 3815.7444 | 7630.4814  | 70  | V        | 33 | 3700.9506 | 1850.9790 | 1234.3217 |
| 2577.8479 | 3866.2682 | 7731.5291  | 71  | T        | 32 | 3601.8822 | 1801.4447 | 1201.2989 |
| 2632.2023 | 3947.7999 | 7894.5924  | 72  | Y        | 31 | 3500.8345 | 1750.9209 | 1167.6164 |
| 2665.8849 | 3998.3237 | 7995.6401  | 73  | T        | 30 | 3337.7712 | 1669.3892 | 1113.2619 |
| 2708.8991 | 4062.8450 | 8124.6827  | 74  | E        | 29 | 3236.7235 | 1618.8654 | 1079.5794 |
| 2754.5854 | 4131.3744 | 8261.7416  | 75  | H        | 28 | 3107.6809 | 1554.3441 | 1036.5652 |
| 2778.2644 | 4166.8930 | 8332.7787  | 76  | A        | 27 | 2970.6220 | 1485.8146 | 990.8789  |
| 2820.9628 | 4230.9405 | 8460.8737  | 77  | K        | 26 | 2899.5849 | 1450.2961 | 967.1998  |
| 2872.9965 | 4308.9910 | 8616.9748  | 78  | R        | 25 | 2771.4899 | 1386.2486 | 924.5015  |
| 2915.6948 | 4373.0385 | 8745.0698  | 79  | K        | 24 | 2615.3888 | 1308.1981 | 872.4678  |
| 2949.3773 | 4423.5624 | 8846.1175  | 80  | T        | 23 | 2487.2939 | 1244.1506 | 829.7695  |
| 2982.4001 | 4473.0966 | 8945.1859  | 81  | V        | 22 | 2386.2462 | 1193.6267 | 796.0869  |
| 3016.0827 | 4523.6204 | 9046.2335  | 82  | T        | 21 | 2287.1778 | 1144.0925 | 763.0641  |
| 3039.7617 | 4559.1390 | 9117.2707  | 83  | A        | 20 | 2186.1301 | 1093.5687 | 729.3816  |
| 3083.4419 | 4624.6592 | 9248.3111  | 84  | M        | 19 | 2115.0930 | 1058.0501 | 705.7025  |
| 3121.7842 | 4682.1727 | 9363.3381  | 85  | D        | 18 | 1984.0525 | 992.5299  | 662.0224  |
| 3154.8070 | 4731.7069 | 9462.4065  | 86  | V        | 17 | 1869.0256 | 935.0164  | 623.6800  |
| 3187.8298 | 4781.2411 | 9561.4749  | 87  | V        | 16 | 1769.9571 | 885.4822  | 590.6572  |
| 3242.1843 | 4862.7728 | 9724.5382  | 88  | Y        | 15 | 1670.8887 | 835.9480  | 557.6344  |
| 3265.8633 | 4898.2913 | 9795.5754  | 89  | A        | 14 | 1507.8254 | 754.4163  | 503.2800  |
| 3303.5580 | 4954.8333 | 9908.6594  | 90  | L        | 13 | 1436.7883 | 718.8978  | 479.6009  |
| 3346.2563 | 5018.8808 | 10036.7544 | 91  | K        | 12 | 1323.7042 | 662.3557  | 441.9063  |
| 3398.2900 | 5096.9314 | 10192.8555 | 92  | R        | 11 | 1195.6093 | 598.3083  | 399.2079  |
| 3440.9762 | 5160.9607 | 10320.9141 | 93  | Q        | 10 | 1039.5081 | 520.2577  | 347.1742  |
| 3459.9834 | 5189.4714 | 10377.9355 | 94  | G        | 9  | 911.4496  | 456.2284  | 304.4880  |
| 3512.0171 | 5267.5220 | 10534.0366 | 95  | R        | 8  | 854.4281  | 427.7177  | 285.4809  |
| 3545.6996 | 5318.0458 | 10635.0843 | 96  | T        | 7  | 698.3270  | 349.6671  | 233.4472  |
| 3583.3943 | 5374.5878 | 10748.1684 | 97  | L        | 6  | 597.2793  | 299.1433  | 199.7646  |
| 3637.7488 | 5456.1195 | 10911.2317 | 98  | Y        | 5  | 484.1953  | 242.6013  | 162.0699  |
| 3656.7559 | 5484.6302 | 10968.2532 | 99  | G        | 4  | 321.1319  | 161.0696  | 107.7155  |
| 3705.7787 | 5558.1644 | 11115.3216 | 100 | F        | 3  | 264.1105  | 132.5589  | 88.7083   |
| 3724.7859 | 5586.6752 | 11172.3431 | 101 | G        | 2  | 117.0420  | 59.0247   | 39.6855   |
| 3744.1210 | 5615.6779 | 11230.3485 | 102 | G        | 1  | 60.0206   | 30.5139   | 20.6784   |

Supplemental Figure 2A (cont)

# B

062515 SAU Recom H4 Infusion Var Fills ETD8 PTR20 Elite #81 RT: 3.12 AV: 1 NL: 4.80E5  
T: FTMS + p NSIFull.ms2.703.40@etd8.00@ptr20.00 [190.00-2000.00]

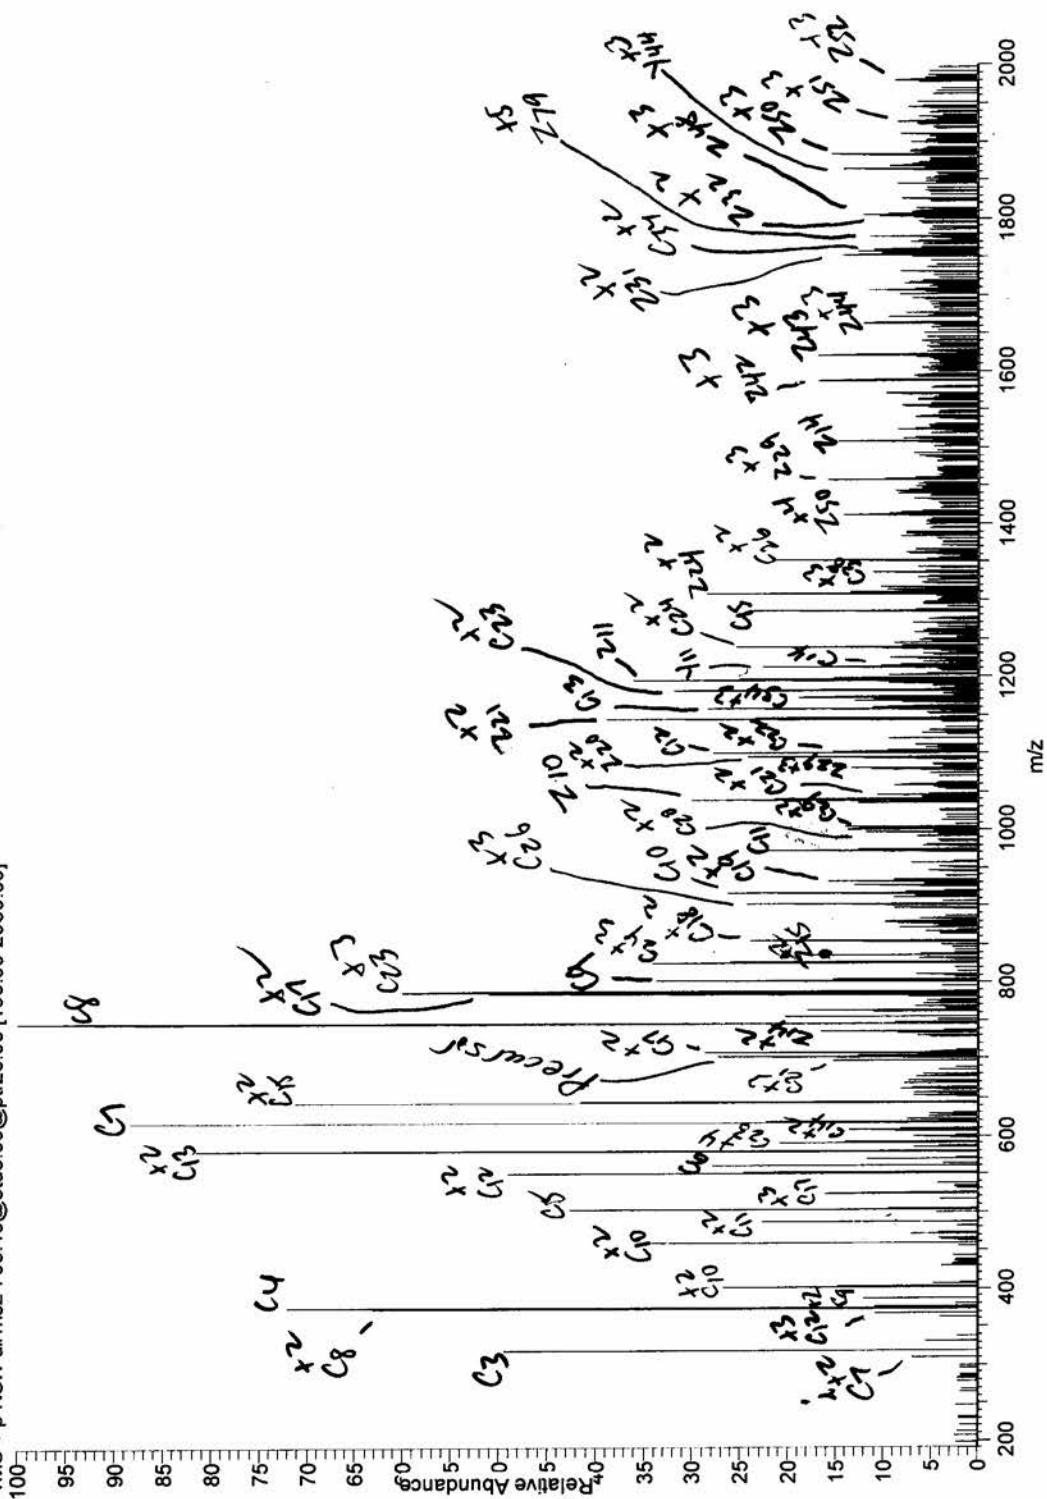

062515\_SAU\_Recom\_H4\_Infusion\_Var\_Fills\_ETD8\_PTR20\_Elite #81 RT: 3.12 AV: 1 NL: 4.80E5  
T: FTMS + p NSI Full ms2 703.40@etd8.00@ptr20.00 [190.00-2000.00]

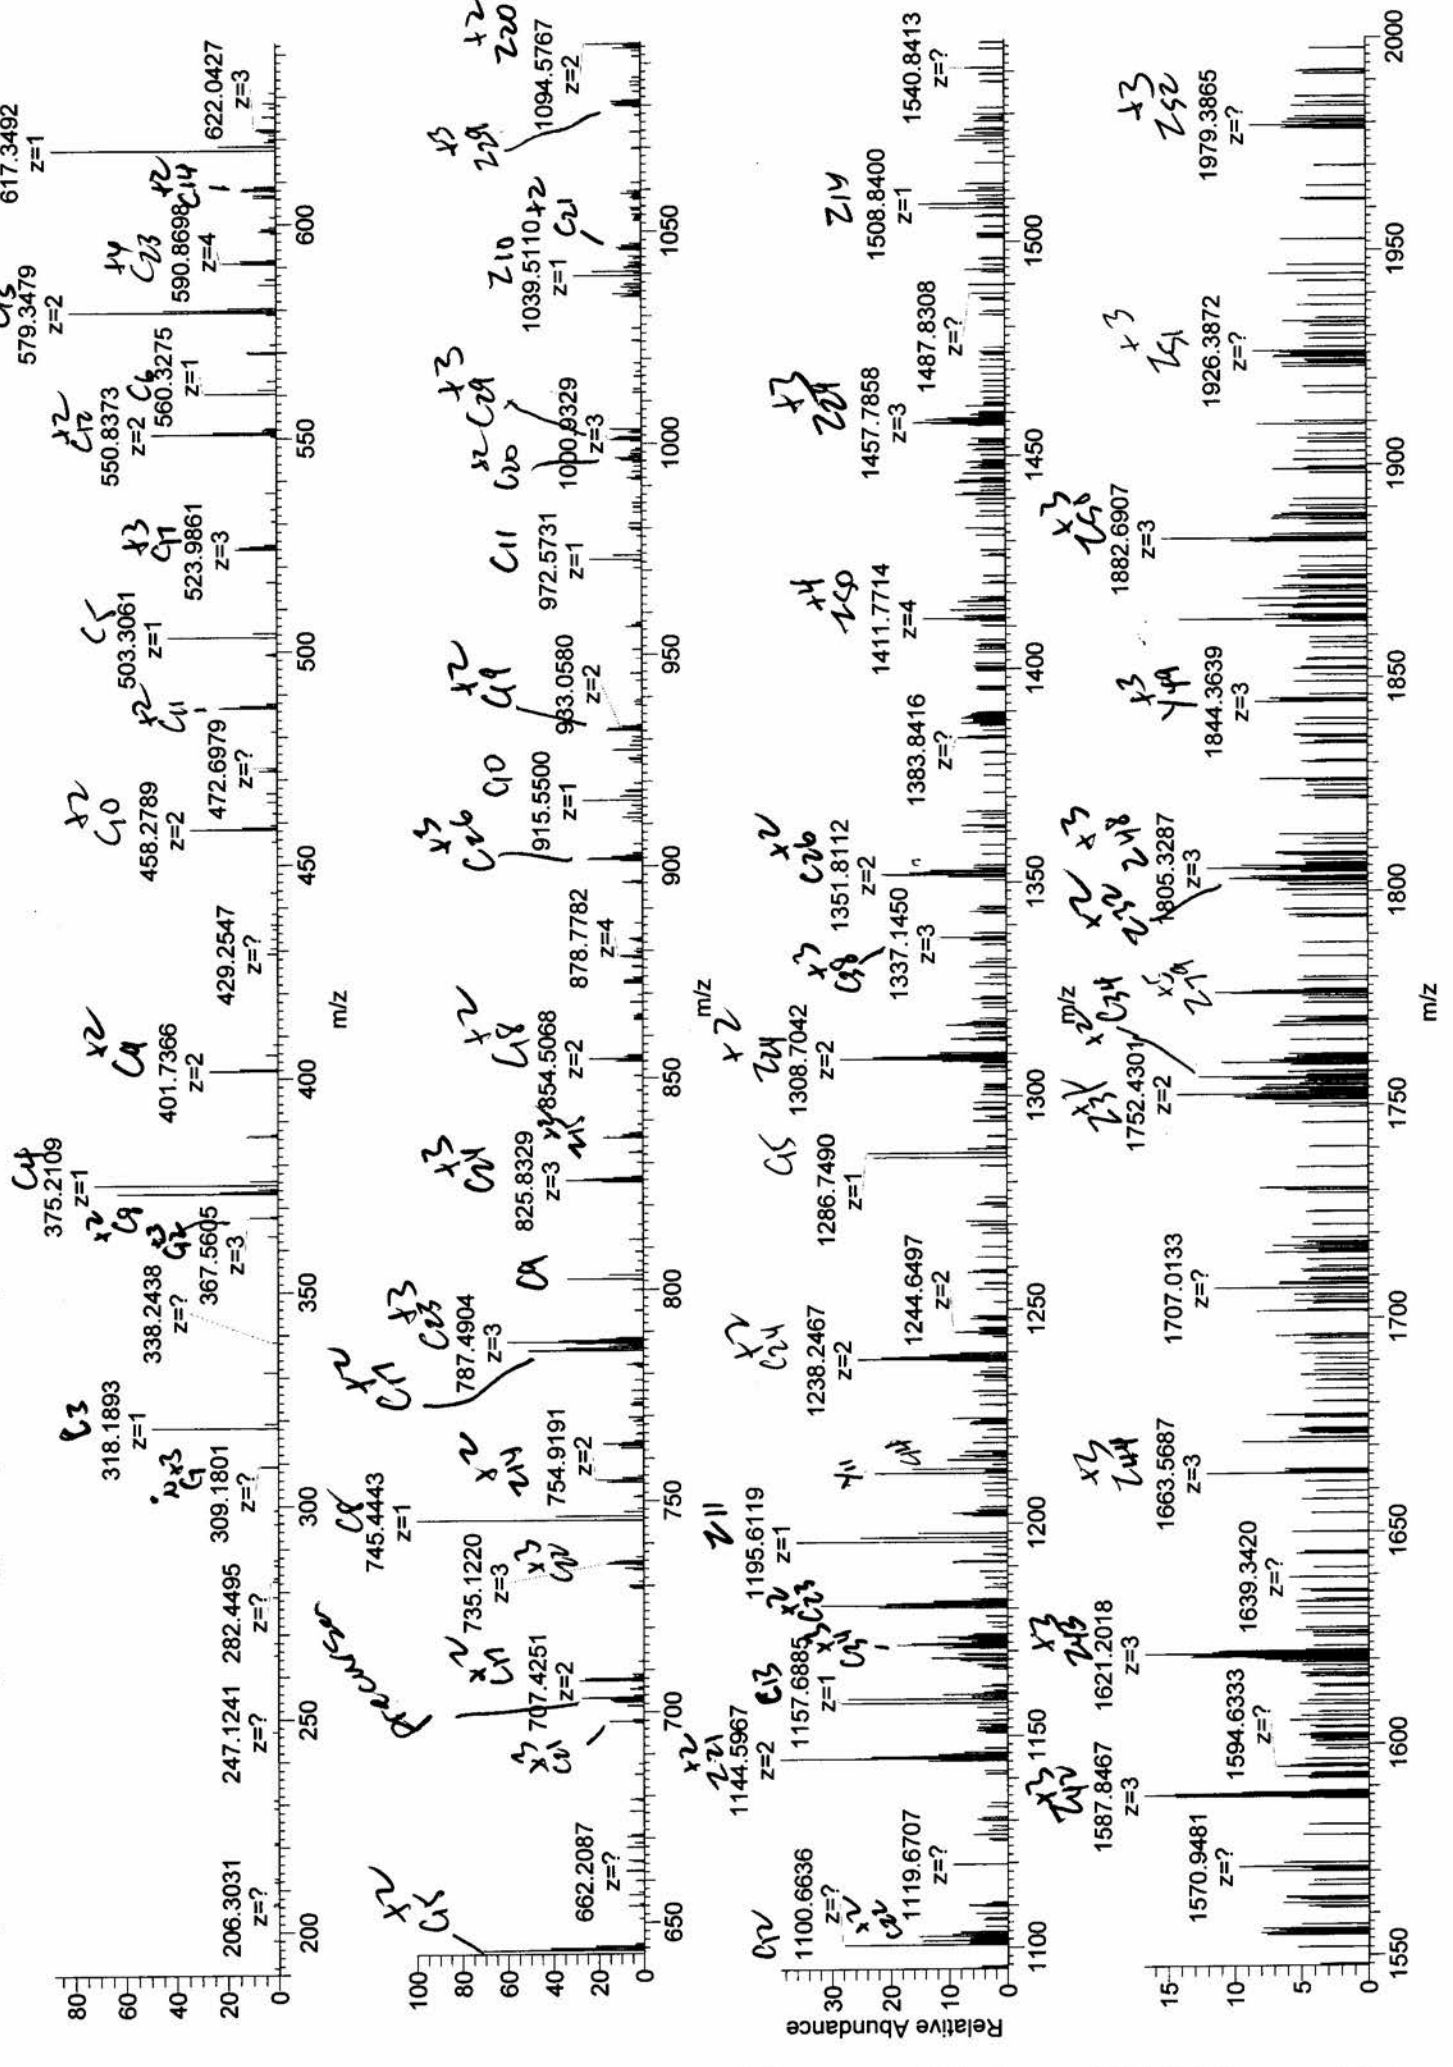

B

## Fragment Masses

| +3 c ions   | +2 c ions   | +1 c ions   |    | Sequence |     | +1 z ions  | +2 z ions | +3 z ions   |
|-------------|-------------|-------------|----|----------|-----|------------|-----------|-------------|
| 35.6935     | 53.0366     | 105.0659    | 1  | S        | 102 | 11230.3485 | 5615.6779 | 3744.1210   |
| 54.7006     | 81.5473     | 162.0873    | 2  | G        | 101 | 11127.2978 | 5564.1525 | 3709.7708   |
| 106.7343    | 159.5979    | 318.1884 ✓  | 3  | R        | 100 | 11070.2763 | 5535.6418 | 3690.7636   |
| 125.7415    | 188.1086    | 375.2099 ✓  | 4  | G        | 99  | 10914.1752 | 5457.5912 | 3638.7299   |
| 168.4398    | 252.1561    | 503.3049 ✓  | 5  | K        | 98  | 10857.1538 | 5429.0805 | 3619.7228   |
| 187.4470    | 280.6668    | 560.3263 ✓  | 6  | G        | 97  | 10729.0588 | 5365.0330 | 3577.0244   |
| 206.4541    | 309.1775 ✓  | 617.3478 ✓  | 7  | G        | 96  | 10672.0373 | 5336.5223 | 3558.0173   |
| 249.1524    | 373.2250 ✓  | 745.4427 ✓  | 8  | K        | 95  | 10615.0159 | 5308.0116 | 3539.0101   |
| 268.1596    | 401.7357 ✓  | 802.4642 ✓  | 9  | G        | 94  | 10486.9209 | 5243.9641 | 3496.3118   |
| 305.8543    | 458.2778 ✓  | 915.5483 ✓  | 10 | L        | 93  | 10429.8994 | 5215.4534 | 3477.3047   |
| 324.8614    | 486.7885 ✓  | 972.5697 ✓  | 11 | G        | 92  | 10316.8154 | 5158.9113 | 3439.6100   |
| 367.5598 ✓  | 550.8360 ✓  | 1100.6647 ✓ | 12 | K        | 91  | 10259.7939 | 5130.4006 | 3420.6028   |
| 386.5669    | 579.3467 ✓  | 1157.6862 ✓ | 13 | G        | 90  | 10131.6989 | 5066.3531 | 3377.9045   |
| 405.5741    | 607.8575 ✓  | 1214.7076 ✓ | 14 | G        | 89  | 10074.6775 | 5037.8424 | 3358.8973   |
| 429.2531    | 643.3760 ✓  | 1285.7447 ✓ | 15 | A        | 88  | 10017.6560 | 5009.3316 | 3339.8902   |
| 471.9514    | 707.4235 ✓  | 1413.8397 ✓ | 16 | K        | 87  | 9946.6189  | 4973.8131 | 3316.2112   |
| 523.9851 ✓  | 785.4740 ✓  | 1569.9408 ✓ | 17 | R        | 86  | 9818.5239  | 4909.7656 | 3273.5128   |
| 569.6714    | 854.0035 ✓  | 1706.9997 ✓ | 18 | H        | 85  | 9662.4228  | 4831.7151 | 3221.4791   |
| 621.7051    | 932.0541 ✓  | 1863.1008 ✓ | 19 | R        | 84  | 9525.3639  | 4763.1856 | 3175.7928   |
| 664.4035    | 996.1015 ✓  | 1991.1958 ✓ | 20 | K        | 83  | 9369.2628  | 4685.1350 | 3123.7591   |
| 697.4263 ✓  | 1045.6357 ✓ | 2090.2642 ✓ | 21 | V        | 82  | 9241.1678  | 4621.0876 | 3081.0608   |
| 735.1209 ✓  | 1102.1778 ✓ | 2203.3483 ✓ | 22 | L        | 81  | 9142.0994  | 4571.5534 | 3048.0380   |
| 787.1546 ✓  | 1180.2283 ✓ | 2359.4494 ✓ | 23 | R        | 80  | 9029.0154  | 4515.0113 | 3010.3433   |
| 825.4970 ✓  | 1237.7418 ✓ | 2474.4763 ✓ | 24 | D        | 79  | 8872.9143  | 4436.9608 | 2958.3096   |
| 863.5113    | 1294.7633 ✓ | 2588.5193 ✓ | 25 | N        | 78  | 8757.8873  | 4379.4473 | 2919.9673   |
| 901.2060 ✓  | 1351.3053 ✓ | 2701.6033 ✓ | 26 | I        | 77  | 8643.8444  | 4322.4258 | 2881.9530   |
| 943.8922    | 1415.3346 ✓ | 2829.6619 ✓ | 27 | Q        | 76  | 8530.7603  | 4265.8838 | 2844.2583   |
| 962.8993    | 1443.8453 ✓ | 2886.6834 ✓ | 28 | G        | 75  | 8402.7017  | 4201.8545 | 2801.5721   |
| 1000.5940 ✓ | 1500.3874 ✓ | 2999.7674 ✓ | 29 | I        | 74  | 8345.6803  | 4173.3438 | 2782.5649   |
| 1034.2766   | 1550.9112 ✓ | 3100.8151 ✓ | 30 | T        | 73  | 8232.5962  | 4116.8017 | 2744.8703   |
| 1076.9749   | 1614.9587 ✓ | 3228.9101 ✓ | 31 | K        | 72  | 8131.5485  | 4066.2779 | 2711.1877   |
| 1109.3258   | 1663.4851 ✓ | 3325.9628 ✓ | 32 | P        | 71  | 8003.4536  | 4002.2304 | 2668.4894   |
| 1133.0048   | 1699.0036 ✓ | 3397.0000 ✓ | 33 | A        | 70  | 7906.4008  | 3953.7040 | 2636.1385   |
| 1170.6995 ✓ | 1755.5456 ✓ | 3510.0840 ✓ | 34 | I        | 69  | 7835.3637  | 3918.1855 | 2612.4594   |
| 1222.7332   | 1833.5962 ✓ | 3666.1851 ✓ | 35 | R        | 68  | 7722.2796  | 3861.6435 | 2574.7647   |
| 1274.7669   | 1911.6468 ✓ | 3822.2862 ✓ | 36 | R        | 67  | 7566.1785  | 3783.5929 | 2522.7310   |
| 1312.4616   | 1968.1888 ✓ | 3935.3703 ✓ | 37 | L        | 66  | 7410.0774  | 3705.5423 | 2470.6973   |
| 1336.1407 ✓ | 2003.7073 ✓ | 4006.4074 ✓ | 38 | A        | 65  | 7296.9933  | 3649.0003 | 2433.0026   |
| 1388.1744   | 2081.7579 ✓ | 4162.5085 ✓ | 39 | R        | 64  | 7225.9562  | 3613.4818 | 2409.3236   |
| 1440.2081   | 2159.8085 ✓ | 4318.6096 ✓ | 40 | R        | 63  | 7069.8551  | 3535.4312 | 2357.2899   |
| 1459.2152   | 2188.3192 ✓ | 4375.6311 ✓ | 41 | G        | 62  | 6913.7540  | 3457.3806 | 2305.2562   |
| 1478.2224   | 2216.8299 ✓ | 4432.6526 ✓ | 42 | G        | 61  | 6856.7325  | 3428.8699 | 2286.2490   |
| 1511.2452   | 2266.3641 ✓ | 4531.7210 ✓ | 43 | V        | 60  | 6799.7111  | 3400.3592 | 2267.2419   |
| 1553.9435   | 2330.4116 ✓ | 4659.8159 ✓ | 44 | K        | 59  | 6700.6427  | 3350.8250 | 2234.2191   |
| 1605.9772   | 2408.4622 ✓ | 4815.9171 ✓ | 45 | R        | 58  | 6572.5477  | 3286.7775 | 2191.5208   |
| 1643.6719   | 2465.0042 ✓ | 4929.0011 ✓ | 46 | I        | 57  | 6416.4466  | 3208.7269 | 2139.4870   |
| 1672.6826   | 2508.5202 ✓ | 5016.0332 ✓ | 47 | S        | 56  | 6303.3625  | 3152.1849 | 2101.7924   |
| 1691.6897   | 2537.0309 ✓ | 5073.0546 ✓ | 48 | G        | 55  | 6216.3305  | 3108.6689 | 2072.7817   |
| 1729.3844   | 2593.5730 ✓ | 5186.1387 ✓ | 49 | L        | 54  | 6159.3090  | 3080.1582 | 2053.7745   |
| 1767.0791   | 2650.1150 ✓ | 5299.2227 ✓ | 50 | I        | 53  | 6046.2250  | 3023.6161 | 2016.0798   |
| 1821.4335   | 2731.6467 ✓ | 5462.2861 ✓ | 51 | Y        | 52  | 5933.1409  | 2967.0741 | 1978.3852 ✓ |

Supplemental Figure 2B (cont)

B

## Fragment Masses

| +3 c ions | +2 c ions | +1 c ions  |     | Sequence |    | +1 z ions   | +2 z ions   | +3 z ions   |
|-----------|-----------|------------|-----|----------|----|-------------|-------------|-------------|
| 1864.4477 | 2796.1680 | 5591.3287  | 52  | E        | 51 | 5770.0776   | 2885.5424   | 1924.0307 ✓ |
| 1907.4619 | 2860.6893 | 5720.3713  | 53  | E        | 50 | 5641.0350   | 2821.0211   | 1881.0165 ✓ |
| 1941.1445 | 2911.2131 | 5821.4189  | 54  | T        | 49 | 5511.9924   | 2756.4998   | 1838.0023   |
| 1993.1782 | 2989.2637 | 5977.5200  | 55  | R        | 48 | 5410.9447   | 2705.9760   | 1804.3198 ✓ |
| 2012.1854 | 3017.7744 | 6034.5415  | 56  | G        | 47 | 5254.8436   | 2627.9254   | 1752.2860   |
| 2045.2082 | 3067.3086 | 6133.6099  | 57  | V        | 46 | 5197.8221   | 2599.4147   | 1733.2789   |
| 2082.9028 | 3123.8506 | 6246.6940  | 58  | L        | 45 | 5098.7537   | 2549.8805   | 1700.2561   |
| 2125.6012 | 3187.8981 | 6374.7890  | 59  | K        | 44 | 4985.6697   | 2493.3385   | 1662.5614 ✓ |
| 2158.6240 | 3237.4323 | 6473.8574  | 60  | V        | 43 | 4857.5747   | 2429.2910   | 1619.8631 ✓ |
| 2207.6468 | 3310.9665 | 6620.9258  | 61  | F        | 42 | 4758.5063   | 2379.7568   | 1586.8403 ✓ |
| 2245.3415 | 3367.5086 | 6734.0098  | 62  | L        | 41 | 4611.4379   | 2306.2226   | 1537.8175   |
| 2288.3557 | 3432.0299 | 6863.0524  | 63  | E        | 40 | 4498.3538   | 2249.6805   | 1500.1228   |
| 2326.3700 | 3489.0513 | 6977.0954  | 64  | N        | 39 | 4369.3112   | 2185.1592   | 1457.1086 ✓ |
| 2359.3928 | 3538.5855 | 7076.1638  | 65  | V        | 38 | 4255.2683   | 2128.1378   | 1419.0943   |
| 2397.0875 | 3595.1276 | 7189.2478  | 66  | I        | 37 | 4156.1999   | 2078.6036   | 1386.0715   |
| 2449.1212 | 3673.1781 | 7345.3490  | 67  | R        | 36 | 4043.1158   | 2022.0615   | 1348.3768   |
| 2487.4635 | 3730.6916 | 7460.3759  | 68  | D        | 35 | 3887.0147   | 1944.0110   | 1296.3431   |
| 2511.1425 | 3766.2101 | 7531.4130  | 69  | A        | 34 | 3771.9877   | 1886.4975   | 1258.0008   |
| 2544.1653 | 3815.7444 | 7630.4814  | 70  | V        | 33 | 3700.9506   | 1850.9790   | 1234.3217   |
| 2577.8479 | 3866.2682 | 7731.5291  | 71  | T        | 32 | 3601.8822   | 1801.4447 ✓ | 1201.2989   |
| 2632.2023 | 3947.7999 | 7894.5924  | 72  | Y        | 31 | 3500.8345   | 1750.9209 ✓ | 1167.6164   |
| 2665.8849 | 3998.3237 | 7995.6401  | 73  | T        | 30 | 3337.7712   | 1669.3892   | 1113.2619   |
| 2708.8991 | 4062.8450 | 8124.6827  | 74  | E        | 29 | 3236.7235   | 1618.8654   | 1079.5794 ✓ |
| 2754.5854 | 4131.3744 | 8261.7416  | 75  | H        | 28 | 3107.6809   | 1554.3441   | 1036.5652   |
| 2778.2644 | 4166.8930 | 8332.7787  | 76  | A        | 27 | 2970.6220   | 1485.8146   | 990.8789    |
| 2820.9628 | 4230.9405 | 8460.8737  | 77  | K        | 26 | 2899.5849   | 1450.2961   | 967.1998    |
| 2872.9965 | 4308.9910 | 8616.9748  | 78  | R        | 25 | 2771.4899   | 1386.2486   | 924.5015    |
| 2915.6948 | 4373.0385 | 8745.0698  | 79  | K        | 24 | 2615.3888   | 1308.1981 ✓ | 872.4678    |
| 2949.3773 | 4423.5624 | 8846.1175  | 80  | T        | 23 | 2487.2939   | 1244.1506   | 829.7695    |
| 2982.4001 | 4473.0966 | 8945.1859  | 81  | V        | 22 | 2386.2462   | 1193.6267   | 796.0869    |
| 3016.0827 | 4523.6204 | 9046.2335  | 82  | T        | 21 | 2287.1778   | 1144.0925 ✓ | 763.0641    |
| 3039.7617 | 4559.1390 | 9117.2707  | 83  | A        | 20 | 2186.1301   | 1093.5687 ✓ | 729.3816    |
| 3083.4419 | 4624.6592 | 9248.3111  | 84  | M        | 19 | 2115.0930   | 1058.0501   | 705.7025    |
| 3121.7842 | 4682.1727 | 9363.3381  | 85  | D        | 18 | 1984.0525   | 992.5299    | 662.0224    |
| 3154.8070 | 4731.7069 | 9462.4065  | 86  | V        | 17 | 1869.0256   | 935.0164    | 623.6800    |
| 3187.8298 | 4781.2411 | 9561.4749  | 87  | V        | 16 | 1769.9571   | 885.4822    | 590.6572    |
| 3242.1843 | 4862.7728 | 9724.5382  | 88  | Y        | 15 | 1670.8887   | 835.9480 ✓  | 557.6344    |
| 3265.8633 | 4898.2913 | 9795.5754  | 89  | A        | 14 | 1507.8254 ✓ | 754.4163 ✓  | 503.2800    |
| 3303.5580 | 4954.8333 | 9908.6594  | 90  | L        | 13 | 1436.7883   | 718.8978    | 479.6009    |
| 3346.2563 | 5018.8808 | 10036.7544 | 91  | K        | 12 | 1323.7042   | 662.3557    | 441.9063    |
| 3398.2900 | 5096.9314 | 10192.8555 | 92  | R        | 11 | 1195.6093 ✓ | 598.3083    | 399.2079    |
| 3440.9762 | 5160.9607 | 10320.9141 | 93  | Q        | 10 | 1039.5081 ✓ | 520.2577    | 347.1742    |
| 3459.9834 | 5189.4714 | 10377.9355 | 94  | G        | 9  | 911.4496    | 456.2284    | 304.4880    |
| 3512.0171 | 5267.5220 | 10534.0366 | 95  | R        | 8  | 854.4281    | 427.7177    | 285.4809    |
| 3545.6996 | 5318.0458 | 10635.0843 | 96  | T        | 7  | 698.3270    | 349.6671    | 233.4472    |
| 3583.3943 | 5374.5878 | 10748.1684 | 97  | L        | 6  | 597.2793    | 299.1433    | 199.7646    |
| 3637.7488 | 5456.1195 | 10911.2317 | 98  | Y        | 5  | 484.1953    | 242.6013    | 162.0699    |
| 3656.7559 | 5484.6302 | 10968.2532 | 99  | G        | 4  | 321.1319    | 161.0696    | 107.7155    |
| 3705.7787 | 5558.1644 | 11115.3216 | 100 | F        | 3  | 264.1105    | 132.5589    | 88.7083     |
| 3724.7859 | 5586.6752 | 11172.3431 | 101 | G        | 2  | 117.0420    | 59.0247     | 39.6855     |
| 3744.1210 | 5615.6779 | 11230.3485 | 102 | G        | 1  | 60.0206     | 30.5139     | 20.6784     |

Supplemental Figure 2B (cont)

Supplemental Figure 2C

C

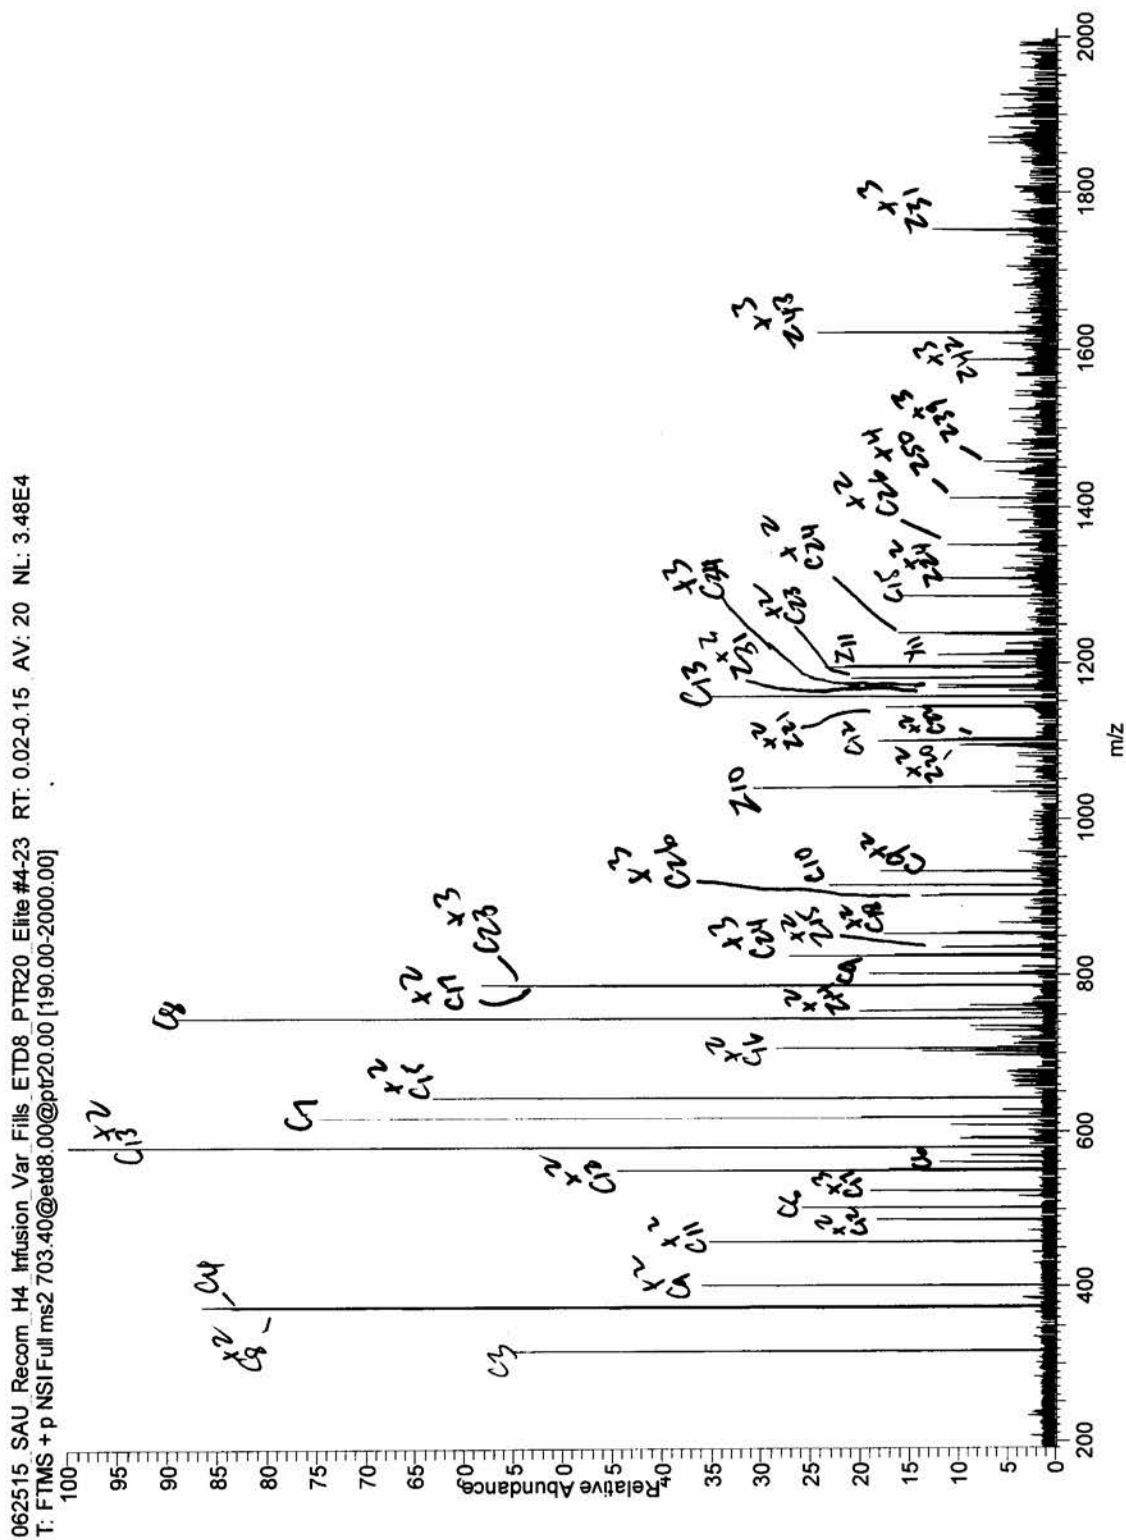



062515\_SAU\_Recom\_H4\_Infusion\_Var\_Fills\_ETD8\_PTR20\_Elite #4-23 RT: 0.02-0.15 AV: 20 NL: 3.48E4  
T: FTMS + p NSI Full ms2 703.40@etd8.00@ptr20.00 [190.00-2000.00]

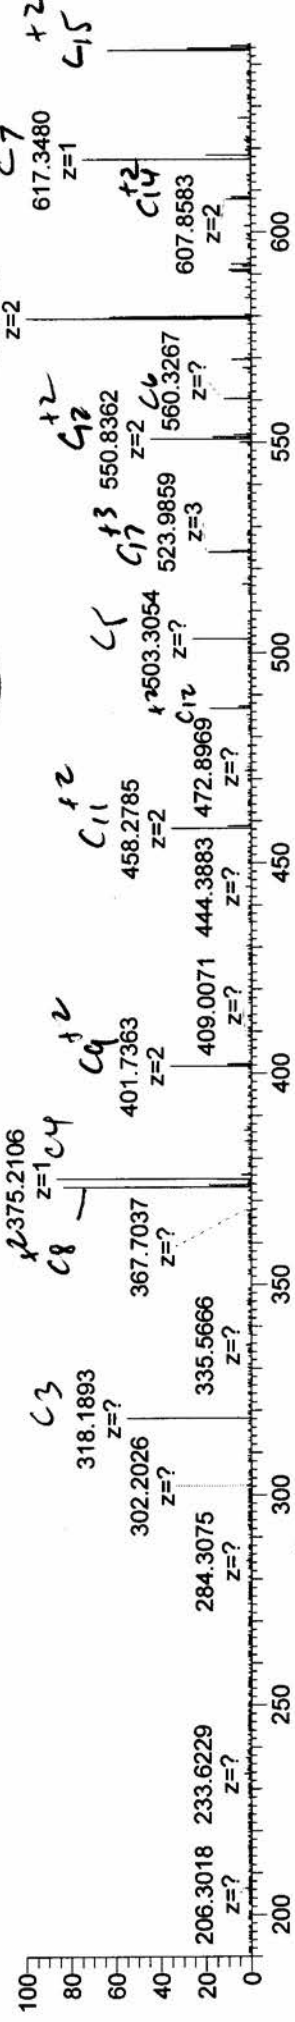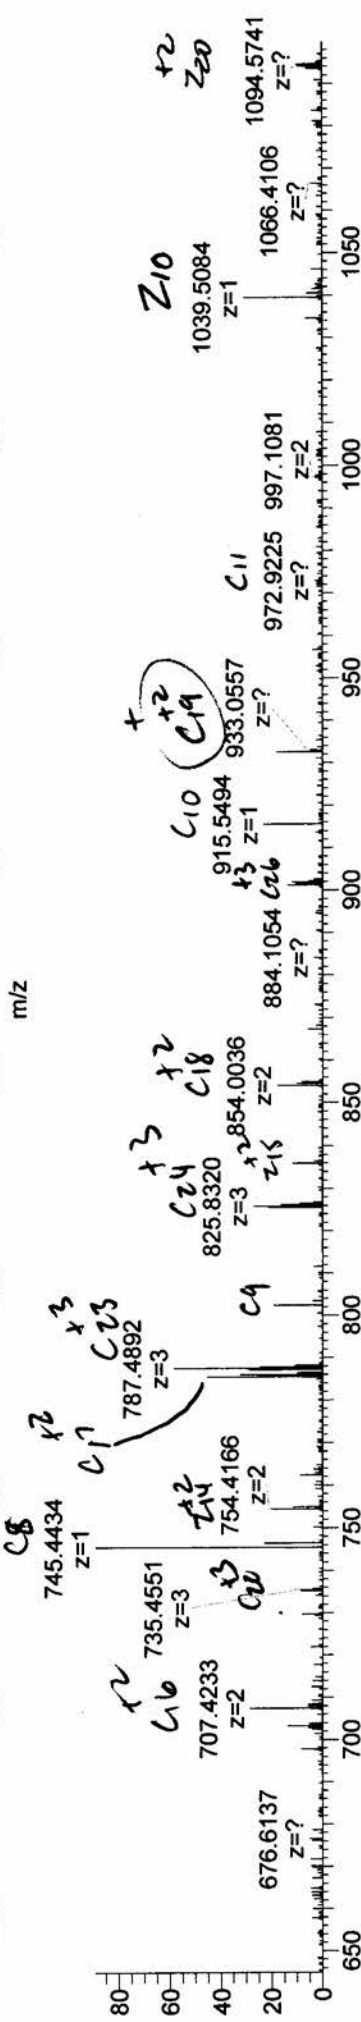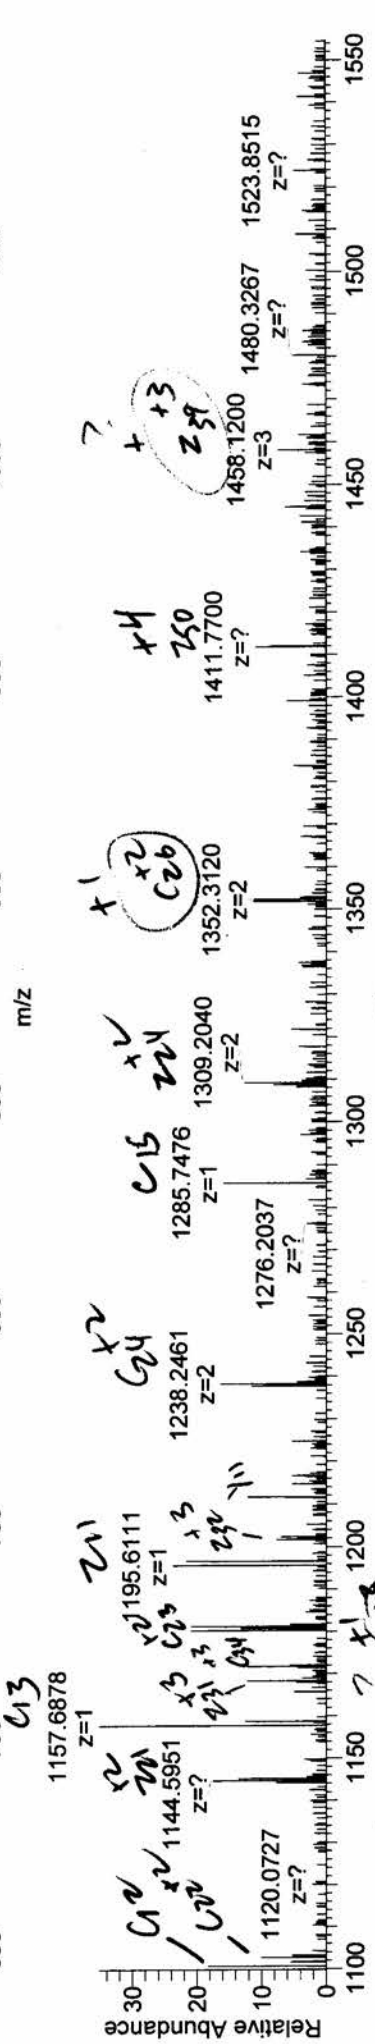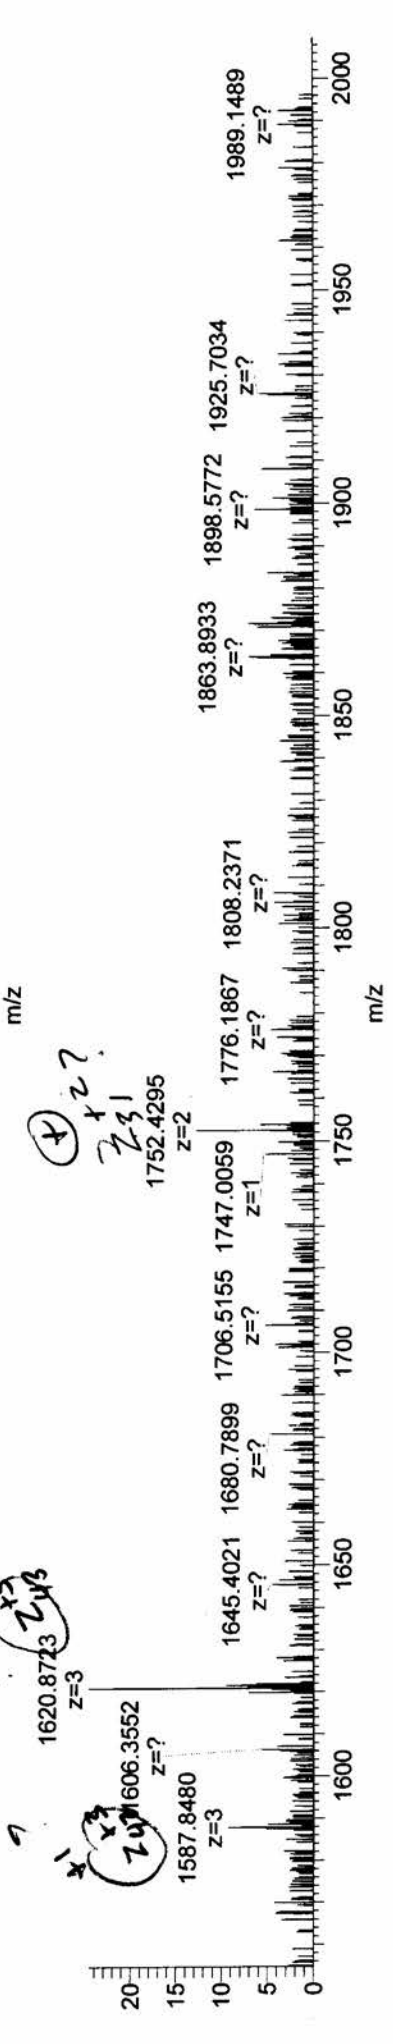

C

## Fragment Masses

| +3 c ions   | +2 c ions   | +1 c ions   |    | Sequence |     | +1 z ions  | +2 z ions | +3 z ions |
|-------------|-------------|-------------|----|----------|-----|------------|-----------|-----------|
| 35.6935     | 53.0366     | 105.0659    | 1  | S        | 102 | 11230.3485 | 5615.6779 | 3744.1210 |
| 54.7006     | 81.5473     | 162.0873    | 2  | G        | 101 | 11127.2978 | 5564.1525 | 3709.7708 |
| 106.7343    | 159.5979    | 318.1884 ✓  | 3  | R        | 100 | 11070.2763 | 5535.6418 | 3690.7636 |
| 125.7415    | 188.1086    | 375.2099 ✓  | 4  | G        | 99  | 10914.1752 | 5457.5912 | 3638.7299 |
| 168.4398    | 252.1561    | 503.3049 ✓  | 5  | K        | 98  | 10857.1538 | 5429.0805 | 3619.7228 |
| 187.4470    | 280.6668    | 560.3263 ✓  | 6  | G        | 97  | 10729.0588 | 5365.0330 | 3577.0244 |
| 206.4541    | 309.1775    | 617.3478 ✓  | 7  | G        | 96  | 10672.0373 | 5336.5223 | 3558.0173 |
| 249.1524    | 373.2250 ✓  | 745.4427 ✓  | 8  | K        | 95  | 10615.0159 | 5308.0116 | 3539.0101 |
| 268.1596    | 401.7357 ✓  | 802.4642 ✓  | 9  | G        | 94  | 10486.9209 | 5243.9641 | 3496.3118 |
| 305.8543    | 458.2778 ✓  | 915.5483    | 10 | L        | 93  | 10429.8994 | 5215.4534 | 3477.3047 |
| 324.8614    | 486.7885 ✓  | 972.5697 ✓  | 11 | G        | 92  | 10316.8154 | 5158.9113 | 3439.6100 |
| 367.5598    | 550.8360 ✓  | 1100.6647 ✓ | 12 | K        | 91  | 10259.7939 | 5130.4006 | 3420.6028 |
| 386.5669    | 579.3467 ✓  | 1157.6862 ✓ | 13 | G        | 90  | 10131.6989 | 5066.3531 | 3377.9045 |
| 405.5741    | 607.8575 ✓  | 1214.7076 ✓ | 14 | G        | 89  | 10074.6775 | 5037.8424 | 3358.8973 |
| 429.2531    | 643.3760 ✓  | 1285.7447 ✓ | 15 | A        | 88  | 10017.6560 | 5009.3316 | 3339.8902 |
| 471.9514    | 707.4235 ✓  | 1413.8397   | 16 | K        | 87  | 9946.6189  | 4973.8131 | 3316.2112 |
| 523.9851 ✓  | 785.4740 ✓  | 1569.9408   | 17 | R        | 86  | 9818.5239  | 4909.7656 | 3273.5128 |
| 569.6714    | 854.0035 ✓  | 1706.9997   | 18 | H        | 85  | 9662.4228  | 4831.7151 | 3221.4791 |
| 621.7051    | 932.0541 ✓  | 1863.1008   | 19 | R        | 84  | 9525.3639  | 4763.1856 | 3175.7928 |
| 664.4035    | 996.1015    | 1991.1958   | 20 | K        | 83  | 9369.2628  | 4685.1350 | 3123.7591 |
| 697.4263    | 1045.6357   | 2090.2642   | 21 | V        | 82  | 9241.1678  | 4621.0876 | 3081.0608 |
| 735.1209 ✓  | 1102.1778 ✓ | 2203.3483   | 22 | L        | 81  | 9142.0994  | 4571.5534 | 3048.0380 |
| 787.1546 ✓  | 1180.2283 ✓ | 2359.4494   | 23 | R        | 80  | 9029.0154  | 4515.0113 | 3010.3433 |
| 825.4970 ✓  | 1237.7418 ✓ | 2474.4763   | 24 | D        | 79  | 8872.9143  | 4436.9608 | 2958.3096 |
| 863.5113    | 1294.7633   | 2588.5193   | 25 | N        | 78  | 8757.8873  | 4379.4473 | 2919.9673 |
| 901.2060 ✓  | 1351.3053 ✓ | 2701.6033   | 26 | I        | 77  | 8643.8444  | 4322.4258 | 2881.9530 |
| 943.8922    | 1415.3346   | 2829.6619   | 27 | Q        | 76  | 8530.7603  | 4265.8838 | 2844.2583 |
| 962.8993    | 1443.8453   | 2886.6834   | 28 | G        | 75  | 8402.7017  | 4201.8545 | 2801.5721 |
| 1000.5940   | 1500.3874   | 2999.7674   | 29 | I        | 74  | 8345.6803  | 4173.3438 | 2782.5649 |
| 1034.2766   | 1550.9112   | 3100.8151   | 30 | T        | 73  | 8232.5962  | 4116.8017 | 2744.8703 |
| 1076.9749   | 1614.9587   | 3228.9101   | 31 | K        | 72  | 8131.5485  | 4066.2779 | 2711.1877 |
| 1109.3258   | 1663.4851   | 3325.9628   | 32 | P        | 71  | 8003.4536  | 4002.2304 | 2668.4894 |
| 1133.0048   | 1699.0036   | 3397.0000   | 33 | A        | 70  | 7906.4008  | 3953.7040 | 2636.1365 |
| 1170.6995 ✓ | 1755.5456   | 3510.0840   | 34 | I        | 69  | 7835.3637  | 3918.1855 | 2612.4594 |
| 1222.7332   | 1833.5962   | 3666.1851   | 35 | R        | 68  | 7722.2796  | 3861.6435 | 2574.7647 |
| 1274.7669   | 1911.6468   | 3822.2862   | 36 | R        | 67  | 7566.1785  | 3783.5929 | 2522.7310 |
| 1312.4616   | 1968.1888   | 3935.3703   | 37 | L        | 66  | 7410.0774  | 3705.5423 | 2470.6973 |
| 1336.1407   | 2003.7073   | 4006.4074   | 38 | A        | 65  | 7296.9933  | 3649.0003 | 2433.0026 |
| 1388.1744   | 2081.7579   | 4162.5085   | 39 | R        | 64  | 7225.9562  | 3613.4818 | 2409.3236 |
| 1440.2081   | 2159.8085   | 4318.6096   | 40 | R        | 63  | 7069.8551  | 3535.4312 | 2357.2899 |
| 1459.2152   | 2188.3192   | 4375.6311   | 41 | G        | 62  | 6913.7540  | 3457.3806 | 2305.2562 |
| 1478.2224   | 2216.8299   | 4432.6526   | 42 | G        | 61  | 6856.7325  | 3428.8699 | 2286.2490 |
| 1511.2452   | 2266.3641   | 4531.7210   | 43 | V        | 60  | 6799.7111  | 3400.3592 | 2267.2419 |
| 1553.9435   | 2330.4116   | 4659.8159   | 44 | K        | 59  | 6700.6427  | 3350.8250 | 2234.2191 |
| 1605.9772   | 2408.4622   | 4815.9171   | 45 | R        | 58  | 6572.5477  | 3286.7775 | 2191.5208 |
| 1643.6719   | 2465.0042   | 4929.0011   | 46 | I        | 57  | 6416.4466  | 3208.7269 | 2139.4870 |
| 1672.6826   | 2508.5202   | 5016.0332   | 47 | S        | 56  | 6303.3625  | 3152.1849 | 2101.7924 |
| 1691.6897   | 2537.0309   | 5073.0546   | 48 | G        | 55  | 6216.3305  | 3108.6689 | 2072.7817 |
| 1729.3844   | 2593.5730   | 5186.1387   | 49 | L        | 54  | 6159.3090  | 3080.1582 | 2053.7745 |
| 1767.0791   | 2650.1150   | 5299.2227   | 50 | I        | 53  | 6046.2250  | 3023.6161 | 2016.0798 |
| 1821.4335   | 2731.6467   | 5462.2861   | 51 | Y        | 52  | 5933.1409  | 2967.0741 | 1978.3852 |

Supplemental Figure 2C (cont)

C

# Fragment Masses

| +3 c ions | +2 c ions | +1 c ions  |     | Sequence |    | +1 z ions | +2 z ions | +3 z ions |
|-----------|-----------|------------|-----|----------|----|-----------|-----------|-----------|
| 1864.4477 | 2796.1680 | 5591.3287  | 52  | E        | 51 | 5770.0776 | 2885.5424 | 1924.0307 |
| 1907.4619 | 2860.6893 | 5720.3713  | 53  | E        | 50 | 5641.0350 | 2821.0211 | 1881.0165 |
| 1941.1445 | 2911.2131 | 5821.4189  | 54  | T        | 49 | 5511.9924 | 2756.4998 | 1838.0023 |
| 1993.1782 | 2989.2637 | 5977.5200  | 55  | R        | 48 | 5410.9447 | 2705.9760 | 1804.3198 |
| 2012.1854 | 3017.7744 | 6034.5415  | 56  | G        | 47 | 5254.8436 | 2627.9254 | 1752.2860 |
| 2045.2082 | 3067.3086 | 6133.6099  | 57  | V        | 46 | 5197.8221 | 2599.4147 | 1733.2789 |
| 2082.9028 | 3123.8506 | 6246.6940  | 58  | L        | 45 | 5098.7537 | 2549.8805 | 1700.2561 |
| 2125.6012 | 3187.8981 | 6374.7890  | 59  | K        | 44 | 4985.6697 | 2493.3385 | 1662.5614 |
| 2158.6240 | 3237.4323 | 6473.8574  | 60  | V        | 43 | 4857.5747 | 2429.2910 | 1619.8631 |
| 2207.6468 | 3310.9665 | 6620.9258  | 61  | F        | 42 | 4758.5063 | 2379.7568 | 1586.8403 |
| 2245.3415 | 3367.5086 | 6734.0098  | 62  | L        | 41 | 4611.4379 | 2306.2226 | 1537.8175 |
| 2288.3557 | 3432.0299 | 6863.0524  | 63  | E        | 40 | 4498.3538 | 2249.6805 | 1500.1228 |
| 2326.3700 | 3489.0513 | 6977.0954  | 64  | N        | 39 | 4369.3112 | 2185.1592 | 1457.1086 |
| 2359.3928 | 3538.5855 | 7076.1638  | 65  | V        | 38 | 4255.2683 | 2128.1378 | 1419.0943 |
| 2397.0875 | 3595.1276 | 7189.2478  | 66  | I        | 37 | 4156.1999 | 2078.6036 | 1386.0715 |
| 2449.1212 | 3673.1781 | 7345.3490  | 67  | R        | 36 | 4043.1158 | 2022.0615 | 1348.3768 |
| 2487.4635 | 3730.6916 | 7460.3759  | 68  | D        | 35 | 3887.0147 | 1944.0110 | 1296.3431 |
| 2511.1425 | 3766.2101 | 7531.4130  | 69  | A        | 34 | 3771.9877 | 1886.4975 | 1258.0008 |
| 2544.1653 | 3815.7444 | 7630.4814  | 70  | V        | 33 | 3700.9506 | 1850.9790 | 1234.3217 |
| 2577.8479 | 3866.2682 | 7731.5291  | 71  | T        | 32 | 3601.8822 | 1801.4447 | 1201.2989 |
| 2632.2023 | 3947.7999 | 7894.5924  | 72  | Y        | 31 | 3500.8345 | 1750.9209 | 1167.6164 |
| 2665.8849 | 3998.3237 | 7995.6401  | 73  | T        | 30 | 3337.7712 | 1669.3892 | 1113.2619 |
| 2708.8991 | 4062.8450 | 8124.6827  | 74  | E        | 29 | 3236.7235 | 1618.8654 | 1079.5794 |
| 2754.5854 | 4131.3744 | 8261.7416  | 75  | H        | 28 | 3107.6809 | 1554.3441 | 1036.5652 |
| 2778.2644 | 4166.8930 | 8332.7787  | 76  | A        | 27 | 2970.6220 | 1485.8146 | 990.8789  |
| 2820.9628 | 4230.9405 | 8460.8737  | 77  | K        | 26 | 2899.5849 | 1450.2961 | 967.1998  |
| 2872.9965 | 4308.9910 | 8616.9748  | 78  | R        | 25 | 2771.4899 | 1386.2486 | 924.5015  |
| 2915.6948 | 4373.0385 | 8745.0698  | 79  | K        | 24 | 2615.3888 | 1308.1981 | 872.4678  |
| 2949.3773 | 4423.5624 | 8846.1175  | 80  | T        | 23 | 2487.2939 | 1244.1506 | 829.7695  |
| 2982.4001 | 4473.0966 | 8945.1859  | 81  | V        | 22 | 2386.2462 | 1193.6267 | 796.0869  |
| 3016.0827 | 4523.6204 | 9046.2335  | 82  | T        | 21 | 2287.1778 | 1144.0925 | 763.0641  |
| 3039.7617 | 4559.1390 | 9117.2707  | 83  | A        | 20 | 2186.1301 | 1093.5687 | 729.3816  |
| 3083.4419 | 4624.6592 | 9248.3111  | 84  | M        | 19 | 2115.0930 | 1058.0501 | 705.7025  |
| 3121.7842 | 4682.1727 | 9363.3381  | 85  | D        | 18 | 1984.0525 | 992.5299  | 662.0224  |
| 3154.8070 | 4731.7069 | 9462.4065  | 86  | V        | 17 | 1869.0256 | 935.0164  | 623.6800  |
| 3187.8298 | 4781.2411 | 9561.4749  | 87  | V        | 16 | 1769.9571 | 885.4822  | 590.6572  |
| 3242.1843 | 4862.7728 | 9724.5382  | 88  | Y        | 15 | 1670.8887 | 835.9480  | 557.6344  |
| 3265.8633 | 4898.2913 | 9795.5754  | 89  | A        | 14 | 1507.8254 | 754.4163  | 503.2800  |
| 3303.5580 | 4954.8333 | 9908.6594  | 90  | L        | 13 | 1436.7883 | 718.8978  | 479.6009  |
| 3346.2563 | 5018.8808 | 10036.7544 | 91  | K        | 12 | 1323.7042 | 662.3557  | 441.9063  |
| 3398.2900 | 5096.9314 | 10192.8555 | 92  | R        | 11 | 1195.6093 | 598.3083  | 399.2079  |
| 3440.9762 | 5160.9607 | 10320.9141 | 93  | Q        | 10 | 1039.5081 | 520.2577  | 347.1742  |
| 3459.9834 | 5189.4714 | 10377.9355 | 94  | G        | 9  | 911.4496  | 456.2284  | 304.4880  |
| 3512.0171 | 5267.5220 | 10534.0366 | 95  | R        | 8  | 854.4281  | 427.7177  | 285.4809  |
| 3545.6996 | 5318.0458 | 10635.0843 | 96  | T        | 7  | 698.3270  | 349.6671  | 233.4472  |
| 3583.3943 | 5374.5878 | 10748.1684 | 97  | L        | 6  | 597.2793  | 299.1433  | 199.7646  |
| 3637.7488 | 5456.1195 | 10911.2317 | 98  | Y        | 5  | 484.1953  | 242.6013  | 162.0699  |
| 3656.7559 | 5484.6302 | 10968.2532 | 99  | G        | 4  | 321.1319  | 161.0696  | 107.7155  |
| 3705.7787 | 5558.1644 | 11115.3216 | 100 | F        | 3  | 264.1105  | 132.5589  | 88.7083   |
| 3724.7859 | 5586.6752 | 11172.3431 | 101 | G        | 2  | 117.0420  | 59.0247   | 39.6855   |
| 3744.1210 | 5615.6779 | 11230.3485 | 102 | G        | 1  | 60.0206   | 30.5139   | 20.6784   |

Supplemental Figure 2C (cont)

# Supplemental Figure 3

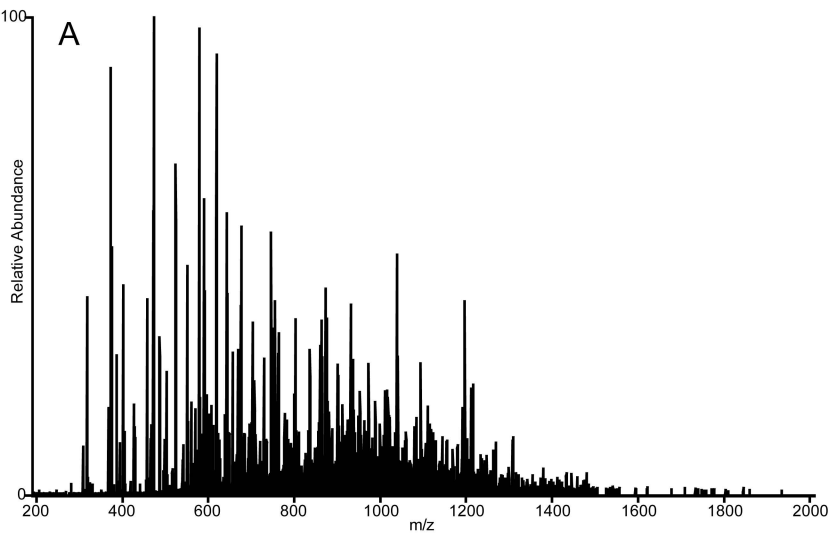

I IPT 20 msec

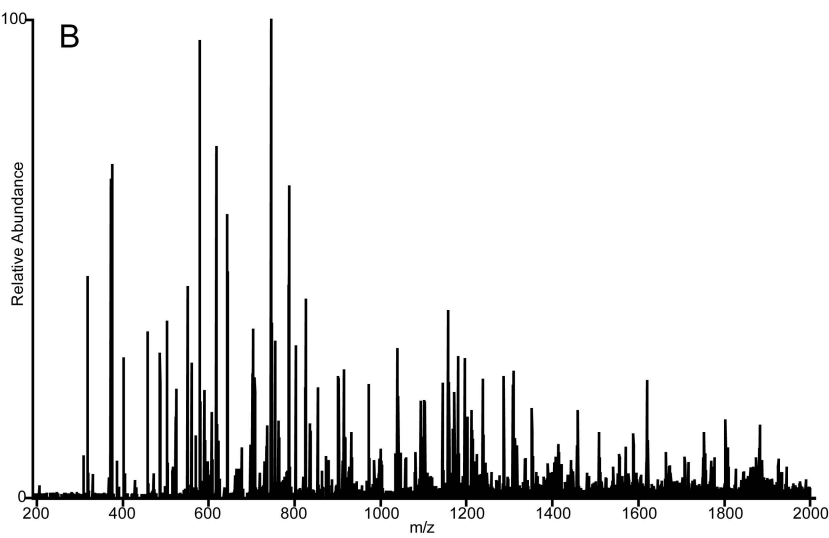

H2A type 1

0.67 pmol H2A2, 125 fmol AV

09/19/13 20:06:18

LCA\_09192013\_ButyratHeLaH2A2\_Garcia...  
0-33% 10, 33-48% 70, 48-100% 80, 0% 85

LCA\_09192013\_ButyratHeLaH2A2\_GarciaLab\_screen\_130919200618 #453-531 RT: 36.42-41.06 AV: 6 NL: 4.83E5  
T: FTMS + p NSI sid=35.00 d Full ms2 738.02@etd4.00@ptr25.00 [190.00-2000.00]

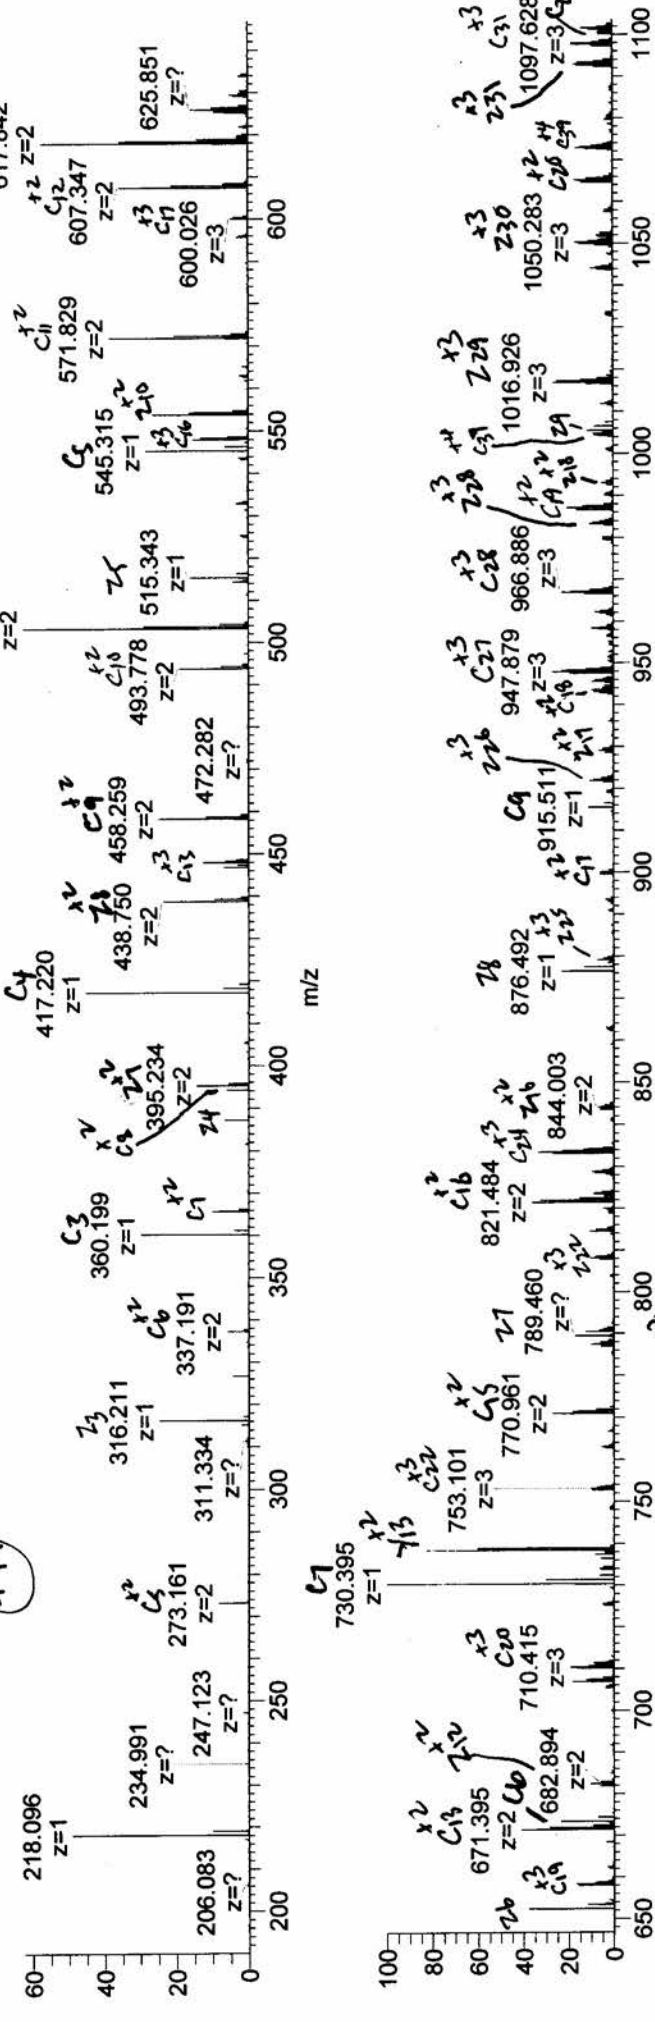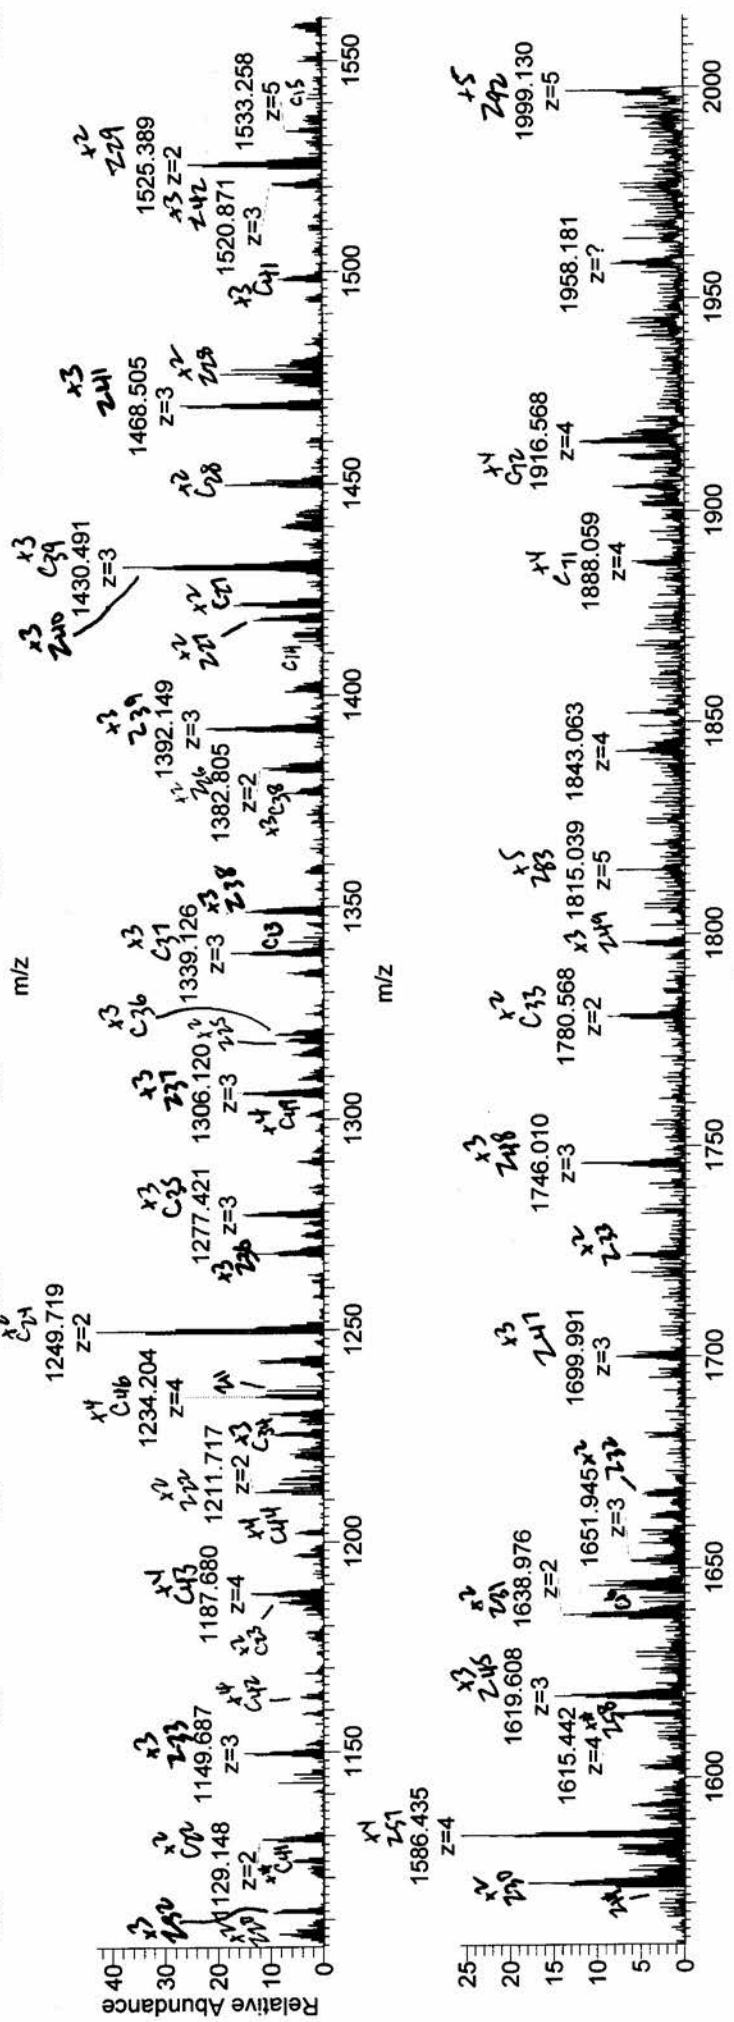

Supplemental Figure 4

H2A type 1

**\*SGRGKQGGKARAKAKTRSSRAGLQFPVGRVHLLRK**

| Charge | Monoisotopic Mass | Average Mass |
|--------|-------------------|--------------|
| 1      | 13994.9263        | 14003.37     |
| 2      | 6997.9668         | 7002.19      |
| 3      | 4665.6469         | 4668.46      |
| 4      | 3499.4870         | 3501.60      |
| 5      | 2799.7911         | 2801.48      |
| 6      | 2333.3271         | 2334.74      |
| 7      | 2000.1386         | 2001.35      |
| 8      | 1750.2472         | 1751.30      |
| 9      | 1555.8872         | 1556.83      |
| 10     | 1400.3992         | 1401.24      |
| 11     | 1273.1817         | 1273.95      |
| 12     | 1167.1672         | 1167.87      |
| 13     | 1077.4626         | 1078.11      |
| 14     | 1000.5729         | 1001.18      |
| 15     | 933.9352          | 934.50       |
| 16     | 875.6272          | 876.16       |
| 17     | 824.1790          | 824.68       |
| 18     | 778.4472          | 778.92       |
| 19     | 737.5293          | 737.97       |
| 20     | 700.7032          | 701.13       |

### Fragment Masses

| +5 c ions | +4 c ions | +3 c ions | +2 c ions | +1 c ions | Sequence | +1 z ions | +2 z ions | +3 z ions  | +4 z ions | +5 z ions |           |           |
|-----------|-----------|-----------|-----------|-----------|----------|-----------|-----------|------------|-----------|-----------|-----------|-----------|
| 30.2211   | 37.5246   | 49.6970   | 74.0419   | 147.0785  | 1        | S         | 129       | 13994.9263 | 6997.9668 | 4665.6469 | 3499.4870 | 2799.7911 |
| 41.6254   | 51.7799   | 68.7042   | 102.5526  | 204.0979  | 2        | G         | 128       | 13849.8649 | 6925.4361 | 4617.2932 | 3463.2217 | 2770.7788 |
| 72.8456   | 90.8052   | 120.7379  | 180.6032  | 360.1990  | 3        | R         | 127       | 13792.8435 | 6896.9254 | 4598.2860 | 3448.9663 | 2759.3745 |
| 84.2499   | 105.0606  | 139.7450  | 209.1139  | 417.2205  | 4        | G         | 126       | 13636.7424 | 6818.8748 | 4546.2523 | 3409.9410 | 2728.1543 |
| 109.8689  | 137.0843  | 182.4433  | 273.1614  | 545.3155  | 5        | K         | 125       | 13579.7209 | 6790.3641 | 4527.2452 | 3395.6857 | 2716.7500 |
| 135.4806  | 169.0990  | 225.1295  | 337.1907  | 673.3740  | 6        | Q         | 124       | 13451.6259 | 6726.3166 | 4484.5468 | 3363.6619 | 2691.1310 |
| 146.8849  | 183.3543  | 244.1367  | 365.7014  | 730.3955  | 7        | G         | 123       | 13323.5674 | 6662.2873 | 4411.8606 | 3331.6473 | 2665.5193 |
| 158.2892  | 197.6097  | 263.1438  | 394.2121  | 787.4170  | 8        | G         | 122       | 13266.5459 | 6633.7766 | 4422.8535 | 3317.3919 | 2654.1150 |
| 183.9082  | 229.6334  | 305.8422  | 458.2596  | 915.5119  | 9        | K         | 121       | 13209.5244 | 6605.2659 | 4403.8463 | 3303.1366 | 2642.7107 |
| 198.1156  | 247.3927  | 329.5212  | 493.7782  | 986.5490  | 10       | A         | 120       | 13081.4295 | 6541.2184 | 4361.1480 | 3271.1128 | 2617.0917 |
| 229.3359  | 286.4180  | 381.5549  | 571.8287  | 1142.6502 | 11       | R         | 119       | 13010.3924 | 6505.6998 | 4337.4690 | 3253.3535 | 2602.8843 |
| 243.5433  | 304.1773  | 405.2339  | 607.3473  | 1213.6873 | 12       | A         | 118       | 12854.2912 | 6427.6493 | 4285.4353 | 3214.3283 | 2571.6641 |
| 269.1623  | 336.2010  | 447.9323  | 671.3948  | 1341.7822 | 13       | K         | 117       | 12783.2541 | 6392.1307 | 4261.7562 | 3196.5690 | 2557.4566 |
| 283.3697  | 353.9603  | 471.6113  | 706.9133  | 1412.8193 | 14       | A         | 116       | 12655.1592 | 6328.0832 | 4219.0579 | 3164.5452 | 2531.8377 |
| 308.9887  | 385.9840  | 514.3096  | 770.9608  | 1540.9143 | 15       | K         | 115       | 12584.1221 | 6292.5647 | 4195.3789 | 3146.7860 | 2517.6302 |
| 329.1982  | 411.2460  | 547.9922  | 821.4846  | 1641.9620 | 16       | T         | 114       | 12456.0271 | 6228.5172 | 4152.6805 | 3114.7622 | 2492.0112 |
| 360.4184  | 450.2712  | 600.0259  | 899.5352  | 1798.0631 | 17       | R         | 113       | 12354.9794 | 6177.9933 | 4118.9980 | 3089.5003 | 2471.8017 |
| 377.8248  | 472.0292  | 629.0366  | 943.0512  | 1885.0951 | 18       | S         | 112       | 12198.8783 | 6099.9428 | 4066.9643 | 3050.4750 | 2440.5815 |
| 395.2313  | 493.7872  | 658.0472  | 986.5672  | 1972.1272 | 19       | S         | 111       | 12111.8463 | 6056.4268 | 4037.9536 | 3028.7170 | 2423.1751 |
| 426.4515  | 532.8125  | 710.0809  | 1064.6178 | 2128.2283 | 20       | R         | 110       | 12024.8142 | 6012.9108 | 4008.9429 | 3006.9590 | 2405.7687 |
| 440.6589  | 550.5718  | 733.7600  | 1100.1363 | 2199.2654 | 21       | A         | 109       | 11868.7131 | 5934.8602 | 3956.9092 | 2967.9337 | 2374.5484 |
| 452.0632  | 564.8272  | 752.7671  | 1128.6471 | 2256.2868 | 22       | G         | 108       | 11797.6760 | 5899.3416 | 3933.2302 | 2950.1745 | 2360.3410 |
| 474.6800  | 593.0982  | 790.4618  | 1185.1891 | 2369.3709 | 23       | L         | 107       | 11740.6546 | 5870.8309 | 3914.2230 | 2935.9191 | 2348.9367 |
| 500.2917  | 625.1128  | 833.1480  | 1249.2184 | 2497.4295 | 24       | Q         | 106       | 11627.5705 | 5814.2889 | 3876.5283 | 2907.6481 | 2326.3199 |
| 529.7054  | 661.8790  | 882.4709  | 1322.7586 | 2644.4979 | 25       | F         | 105       | 11499.5119 | 5750.2596 | 3833.8422 | 2875.6334 | 2300.7082 |
| 549.1160  | 686.1431  | 914.5217  | 1371.2790 | 2741.5507 | 26       | P         | 104       | 11352.4485 | 5676.7254 | 3764.9195 | 2838.6603 | 2271.2945 |
| 568.9296  | 710.9102  | 947.5445  | 1420.8132 | 2840.6191 | 27       | V         | 103       | 11255.3907 | 5628.1990 | 3752.4684 | 2814.6031 | 2251.8840 |
| 580.3339  | 725.1656  | 966.5517  | 1449.3239 | 2897.6405 | 28       | G         | 102       | 11156.3223 | 5578.6648 | 3719.4456 | 2789.8360 | 2232.0703 |
| 611.5542  | 764.1909  | 1018.5854 | 1527.3745 | 3053.7417 | 29       | R         | 101       | 11099.3009 | 5550.1541 | 3700.4385 | 2775.5807 | 2220.6660 |
| 631.3678  | 788.9580  | 1051.6082 | 1576.9087 | 3152.8101 | 30       | V         | 100       | 10943.1997 | 5472.1035 | 3648.4048 | 2736.5554 | 2189.4458 |
| 658.7796  | 823.2227  | 1097.2945 | 1645.4381 | 3289.8690 | 31       | H         | 99        | 10844.1313 | 5422.5693 | 3615.3820 | 2711.7883 | 2169.6321 |
| 689.9998  | 862.2480  | 1149.3282 | 1723.4887 | 3445.9701 | 32       | R         | 98        | 10707.0724 | 5354.0398 | 3569.6957 | 2677.5236 | 2142.2203 |
| 712.6167  | 890.5190  | 1187.0229 | 1780.0307 | 3559.0542 | 33       | L         | 97        | 10550.9713 | 5275.9893 | 3517.6620 | 2638.4983 | 2111.0001 |
| 735.2335  | 918.7900  | 1224.7176 | 1836.5727 | 3672.1382 | 34       | L         | 96        | 10437.8872 | 5219.4473 | 3479.9673 | 2610.2273 | 2088.3833 |
| 766.4537  | 957.8153  | 1276.7513 | 1914.6233 | 3828.2393 | 35       | R         | 95        | 10324.8032 | 5162.9052 | 3442.2726 | 2581.9563 | 2065.7665 |
| 792.0727  | 989.8390  | 1319.4496 | 1978.6708 | 3956.3343 | 36       | K         | 94        | 10168.7021 | 5084.8547 | 3390.2389 | 2542.9310 | 2034.5462 |
| 803.4770  | 1004.0944 | 1338.4568 | 2007.1815 | 4013.3558 | 37       | G         | 93        | 10040.6071 | 5020.8072 | 3347.5406 | 2510.9072 | 2008.9272 |
| 826.2856  | 1032.6051 | 1376.4711 | 2064.2030 | 4127.3987 | 38       | N         | 92        | 9983.5856  | 4992.2965 | 3328.5334 | 2496.6519 | 1997.5229 |
| 858.8982  | 1073.3710 | 1430.8255 | 2145.7346 | 4290.4620 | 39       | Y         | 91        | 9869.5427  | 4935.2750 | 3290.5191 | 2468.1411 | 1974.7144 |
| 873.1056  | 1091.1302 | 1454.5046 | 2181.2532 | 4361.4991 | 40       | A         | 90        | 9706.4794  | 4853.7433 | 3236.1646 | 2427.3753 | 1942.1017 |
| 898.9142  | 1123.3909 | 1497.5188 | 2245.7745 | 4490.5417 | 41       | E         | 89        | 9635.4423  | 4818.2248 | 3212.4856 | 2409.6160 | 1927.8943 |
| 930.1344  | 1162.4162 | 1549.5525 | 2323.8251 | 4646.6428 | 42       | R         | 88        | 9506.3997  | 4753.7035 | 3169.4714 | 2377.3554 | 1902.0858 |
| 949.9481  | 1187.1833 | 1582.5753 | 2373.3593 | 4745.7112 | 43       | V         | 87        | 9350.2986  | 4675.6529 | 3117.4377 | 2338.3301 | 1870.8656 |
| 961.3524  | 1201.4386 | 1601.5824 | 2401.8700 | 4802.7327 | 44       | G         | 86        | 9251.2302  | 4626.1187 | 3084.4149 | 2313.5630 | 1851.0519 |
| 975.5598  | 1219.1979 | 1625.2615 | 2437.3885 | 4873.7698 | 45       | A         | 85        | 9194.2087  | 4597.6080 | 3065.4077 | 2299.3076 | 1839.6476 |
| 986.9641  | 1233.4533 | 1644.2686 | 2465.8993 | 4930.7913 | 46       | G         | 84        | 9123.1716  | 4562.0894 | 3041.7287 | 2281.5484 | 1825.4401 |
| 1001.4716 | 1251.2426 | 1667.0477 | 2501.4178 | 5001.8294 | 47       | A         | 83        | 9066.1501  | 4533.5787 | 3022.7216 | 2267.2930 | 1814.0358 |
| 1020.5821 | 1275.4757 | 1700.2986 | 2549.9442 | 5098.8812 | 48       | P         | 82        | 9006.1489  | 4498.9681 | 2998.9426 | 2248.5987 | 1798.9294 |
| 1040.3957 | 1300.2429 | 1733.3214 | 2599.4784 | 5197.9496 | 49       | V         | 81        | 8988.0502  | 4449.5338 | 2966.6916 | 2225.2705 | 1780.4179 |
| 1073.0084 | 1341.0087 | 1787.6758 | 2681.0101 | 5361.0129 | 50       | Y         | 80        | 8798.9918  | 4399.9995 | 2933.6688 | 2200.5034 | 1760.6042 |
| 1095.6252 | 1369.2797 | 1825.3705 | 2737.5521 | 5474.0970 | 51       | L         | 79        | 8635.9285  | 4318.4679 | 2879.3143 | 2159.7376 | 1727.9915 |
| 1109.8326 | 1387.0390 | 1849.0495 | 2773.0707 | 5545.1341 | 52       | A         | 78        | 8522.8444  | 4261.9259 | 2841.6197 | 2131.4666 | 1705.3747 |
| 1124.0401 | 1404.7983 | 1872.7286 | 2808.5892 | 5616.1712 | 53       | A         | 77        | 8451.8073  | 4226.4073 | 2817.9406 | 2113.7073 | 1691.1673 |
| 1143.8537 | 1429.5654 | 1905.7514 | 2858.1234 | 5715.2396 | 54       | V         | 76        | 8380.7702  | 4190.8887 | 2794.2616 | 2095.9480 | 1676.9599 |
| 1166.4706 | 1457.8364 | 1943.4461 | 2914.6655 | 5829.3237 | 55       | L         | 75        | 8281.7018  | 4141.3545 | 2761.2388 | 2071.1809 | 1657.1462 |
| 1192.2791 | 1490.0970 | 1986.4603 | 2979.1868 | 5957.3663 | 56       | E         | 74        | 8168.6177  | 4084.8125 | 2723.5441 | 2042.9099 | 1634.5294 |
| 1224.8917 | 1530.8629 | 2040.8147 | 3060.7184 | 6120.4296 | 57       | Y         | 73        | 8039.5751  | 4020.2912 | 2680.5299 | 2010.6492 | 1608.7208 |
| 1247.5086 | 1559.1339 | 2078.5094 | 3117.2605 | 6233.5137 | 58       | L         | 72        | 7876.5118  | 3938.7595 | 2626.1754 | 1969.8834 | 1576.1082 |
| 1267.7181 | 1584.3958 | 2112.1920 | 3167.7843 | 6334.5613 | 59       | T         | 71        | 7763.4277  | 3882.2175 | 2588.4808 | 1941.6124 | 1553.4914 |
| 1281.9255 | 1602.1551 | 2135.8710 | 3203.3029 | 6405.5985 | 60       | A         | 70        | 7662.3801  | 3831.6937 | 2554.7982 | 1916.3505 | 1533.2818 |
| 1307.7340 | 1634.4157 | 2178.8852 | 3267.8242 | 6534.6411 | 61       | E         | 69        | 7591.3429  | 3796.1751 | 2531.1192 | 1898.5912 | 1519.0744 |
| 1330.3508 | 1662.6867 | 2216.5799 | 3324.3662 | 6647.7251 | 62       | I         | 68        | 7462.3003  | 3731.6538 | 2488.1050 | 1866.3305 | 1493.2659 |
| 1352.9677 | 1690.9578 | 2254.2746 | 3380.9082 | 6760.8092 | 63       | L         | 67        | 7349.2163  | 3675.1118 | 2450.4103 | 1838.0595 | 1470.6491 |
| 1378.7762 | 1723.2184 | 2297.2888 | 3445.4295 | 6889.8518 | 64       | E         | 66        | 7236.1322  | 3618.5697 | 2412.7156 | 1809.7885 | 1448.0323 |
| 1401.3930 | 1751.4894 | 2334.9835 | 3501.9716 | 7002.9358 | 65       | L         | 65        | 7107.0896  | 3554.0484 | 2369.7014 | 1777.5279 | 1422.2237 |
| 1415.6004 | 1769.2487 | 2358.6625 | 3537.4901 | 7073.9730 | 66       | A         | 64        | 6994.0056  | 3497.5064 | 2332.0067 | 1749.2568 | 1399.6069 |
| 1427.0047 | 1783.5041 | 2377.6697 | 3566.0008 | 7130.9944 | 67       | G         | 63        | 6922.9684  | 3461.9879 | 2308.3277 | 1731.4976 | 1385.3995 |
| 1449.8133 | 1812.0148 | 2415.6840 | 3623.0223 | 7245.0373 | 68       | N         | 62        | 6865.9470  | 3433.4771 | 2289.3205 | 1717.2422 | 1373.9952 |
| 1464.0207 | 1829.7741 | 2439.3630 | 3658.5409 | 7316.0745 | 69       | A         | 61        | 6751.9041  | 3376.4557 | 2251.3062 | 1688.7315 | 1351.1866 |
| 1478.2281 | 1847.5333 | 2463.0420 | 3694.0594 | 7387.1116 | 70       | A         | 60        | 6680.8669  | 3340.9371 | 2227.6272 | 1670.9722 | 1336.9792 |
| 1509.4484 | 1886.5586 | 2515.0757 | 3772.1100 | 7543.2127 | 71       | R         | 59        | 6609.8298  | 3305.4186 | 2203.9491 | 1653.2129 | 1322.7718 |
| 1532.4537 | 1915.3154 | 2553.4181 | 3829.6235 | 7658.2396 | 72       | D         | 58        | 6453.7287  | 3227.3680 | 2151.9144 | 1614.1876 | 1291.5516 |
| 1555.2623 | 1943.8261 | 2591.4324 | 3886.6449 | 7772.2826 | 73       | N         | 57        | 6338.7018  | 3169.8545 | 2113.5721 | 1585.4309 | 1268.5462 |

# Fragment Masses

| +5 c ions            | +4 c ions            | +3 c ions            | +2 c ions            | +1 c ions             |                | Sequence     |               | +1 z ions            | +2 z ions            | +3 z ions            | +4 z ions            | +5 z ions            |
|----------------------|----------------------|----------------------|----------------------|-----------------------|----------------|--------------|---------------|----------------------|----------------------|----------------------|----------------------|----------------------|
| 1580.8813            | 1975.8498            | 2634.1307            | 3950.6924            | 7900.3775             | 74             | K            | 56            | 6224.6588            | 3112.8331            | 2075.5578            | 1556.9202            | 1245.7376            |
| 1606.5003            | 2007.8736            | 2676.8290            | 4014.7399            | 8028.4725             | 75             | K            | 55            | 6096.5639            | 3048.7856            | 2032.8595            | 1524.8964            | 1220.1186            |
| 1626.7099            | 2033.1355            | 2710.5116            | 4065.2637            | 8129.5202             | 76             | T            | 54            | 5968.4689            | 2984.7381            | 1990.1612            | 1492.8727            | 1194.4996            |
| 1657.9301            | 2072.1608            | 2762.5453            | 4143.3143            | 8285.6213             | 77             | R            | 53            | 5867.4212            | 2934.2143            | 1956.4786            | 1467.6108            | 1174.2901            |
| 1680.5469            | 2100.4318            | 2800.2400            | 4199.8563            | 8398.7053             | 78             | I            | 52            | 5711.3201            | 2856.1637            | 1904.4449            | 1428.5855            | 1143.0698            |
| <del>1769.1697</del> | <del>2129.7026</del> | <del>2867.9640</del> | <del>4259.9993</del> | <del>8511.7694</del>  | <del>79</del>  | <del>I</del> | <del>51</del> | <del>5598.2361</del> | <del>2799.6217</del> | <del>1866.7502</del> | <del>1400.3145</del> | <del>1120.4530</del> |
| 1722.5743            | 2152.9660            | 2870.2856            | 4304.9247            | 8608.8422             | 80             | P            | 50            | 5486.1526            | 2749.6796            | 1829.6333            | 1372.0433            | 1087.6392            |
| 1753.7945            | 2191.9913            | 2922.3193            | 4382.9753            | 8764.9433             | 81             | R            | 49            | 5388.0992            | 2694.5533            | 1796.7046            | 1347.7803            | 1078.4257            |
| 1781.2063            | 2226.2560            | 2968.0056            | 4451.5047            | 8902.0022             | 82             | H            | 48            | 5231.9981            | 2616.5027            | 1744.6709            | 1308.7550            | 1047.2054            |
| 1803.8231            | 2254.5270            | 3005.7003            | 4508.0468            | 9015.0862             | 83             | L            | 47            | 5094.9392            | 2547.9732            | 1698.9846            | 1274.4903            | 1019.7937            |
| 1829.4348            | 2286.5417            | 3048.3865            | 4572.0761            | 9143.1448             | 84             | Q            | 46            | 4981.8551            | 2491.4312            | 1661.2899            | 1246.2192            | 997.1769             |
| 1852.0516            | 2314.8127            | 3086.0811            | 4628.6181            | 9256.2289             | 85             | L            | 45            | 4853.7966            | 2427.4019            | 1618.6037            | 1214.2046            | 971.5651             |
| 1866.2590            | 2332.5720            | 3109.7602            | 4664.1366            | 9327.2660             | 86             | A            | 44            | 4740.7125            | 2370.8599            | 1580.9090            | 1185.9336            | 948.9483             |
| 1888.8758            | 2360.8430            | 3147.4549            | 4720.6787            | 9440.3501             | 87             | I            | 43            | 4669.6754            | 2335.3413            | 1557.2300            | 1168.1743            | 934.7409             |
| 1920.0961            | 2399.8683            | 3199.4886            | 4798.7292            | 9596.4512             | 88             | R            | 42            | 4556.5913            | 2278.7993            | 1519.5353            | 1139.9033            | 912.1241             |
| 1942.9046            | 2428.3790            | 3237.5029            | 4855.7507            | 9710.4941             | 89             | N            | 41            | 4400.4902            | 2200.7487            | 1467.5016            | 1100.8780            | 880.9039             |
| 1965.9100            | 2457.1357            | 3275.8452            | 4913.2642            | 9825.5211             | 90             | D            | 40            | 4286.4473            | 2143.7273            | 1429.4873            | 1072.3673            | 858.0953             |
| 1991.7186            | 2489.3964            | 3318.8594            | 4977.7855            | 9954.5636             | 91             | E            | 39            | 4171.4203            | 2086.2138            | 1391.1450            | 1043.6105            | 835.0899             |
| 2017.5271            | 2521.6570            | 3361.8736            | 5042.3068            | 10083.6062            | 92             | E            | 38            | 4042.3777            | 2021.6925            | 1348.1308            | 1011.3499            | 809.2814             |
| 2040.1439            | 2549.9280            | 3399.5683            | 5098.8488            | 10196.6903            | 93             | L            | 37            | 3913.3352            | 1957.1712            | 1305.1166            | 979.0892             | 783.4729             |
| 2062.9525            | 2578.4388            | 3437.5826            | 5155.8703            | 10310.7332            | 94             | N            | 36            | 3800.2511            | 1900.6292            | 1267.4219            | 950.8182             | 760.8560             |
| 2088.5715            | 2610.4625            | 3480.2809            | 5219.9177            | 10438.8282            | 95             | K            | 35            | 3686.2082            | 1843.6077            | 1229.4076            | 922.3075             | 738.0475             |
| 2111.1883            | 2638.7335            | 3517.9756            | 5276.4598            | 10551.9123            | 96             | L            | 34            | 3558.1132            | 1779.5602            | 1186.7093            | 890.2838             | 712.4285             |
| 2133.8051            | 2667.0045            | 3555.6703            | 5333.0018            | 10664.9963            | 97             | L            | 33            | 3445.0291            | 1723.0182            | 1149.0146            | 862.0127             | 689.8116             |
| 2145.2094            | 2681.2599            | 3574.6774            | 5361.5125            | 10722.0178            | 98             | G            | 32            | 3331.9491            | 1666.4762            | 1111.3199            | 833.7417             | 667.1948             |
| 2170.8284            | 2713.2836            | 3617.3758            | 5425.5600            | 10850.1127            | 99             | K            | 31            | 3274.9236            | 1637.9654            | 1092.3127            | 819.4864             | 655.7905             |
| 2190.6421            | 2738.0507            | 3650.3986            | 5475.0942            | 10949.1812            | 100            | V            | 30            | 3146.8286            | 1573.9180            | 1049.6144            | 787.4626             | 630.1715             |
| 2210.8516            | 2783.3127            | 3684.0811            | 5525.6181            | 11050.2288            | 101            | T            | 29            | 3047.7602            | 1524.3838            | 1016.5916            | 762.8955             | 610.3579             |
| 2223.4684            | 2791.5837            | 3721.7758            | 5582.1601            | 11163.3129            | 102            | I            | 28            | 2946.7126            | 1473.8599            | 982.9090             | 737.4336             | 590.1483             |
| 2247.6758            | 2809.3430            | 3745.4549            | 5617.6786            | 11234.3500            | 103            | A            | 27            | 2833.6285            | 1417.3179            | 945.2143             | 709.1626             | 567.5315             |
| 2273.2875            | 2841.3576            | 3788.1411            | 5681.7079            | 11362.4086            | 104            | Q            | 26            | 2762.5914            | 1381.7993            | 921.5353             | 691.4033             | 553.3241             |
| 2284.6918            | 2855.6130            | 3807.1482            | 5710.2187            | 11419.4301            | 105            | G            | 25            | 2634.5328            | 1317.7700            | 878.8491             | 659.3887             | 527.7124             |
| 2296.0961            | 2869.8683            | 3826.1554            | 5738.7294            | 11476.4515            | 106            | G            | 24            | 2577.5113            | 1289.2593            | 859.8420             | 645.1333             | 516.3081             |
| 2315.9098            | 2894.6354            | 3859.1782            | 5788.2636            | 11575.5199            | 107            | V            | 23            | 2520.4899            | 1260.7486            | 840.8348             | 630.8779             | 504.9038             |
| <del>2328.5266</del> | <del>2922.9965</del> | <del>3896.8729</del> | <del>5844.8958</del> | <del>11699.6649</del> | <del>108</del> | <del>L</del> | <del>22</del> | <del>2421.4215</del> | <del>1211.2144</del> | <del>807.8120</del>  | <del>606.1108</del>  | <del>485.0901</del>  |
| 2357.9372            | 2947.1696            | 3929.2238            | 5893.3320            | 11785.6568            | 109            | P            | 21            | 2308.3974            | 1154.8729            | 776.1176             | 577.6396             | 462.4733             |
| 2380.7458            | 2975.6804            | 3967.2381            | 5950.3535            | 11899.6997            | 110            | N            | 20            | 2211.2846            | 1106.1460            | 737.7664             | 553.5766             | 443.0627             |
| 2403.3626            | 3003.9514            | 4004.9328            | 6006.8955            | 12012.7838            | 111            | I            | 19            | 2097.2417            | 1049.1245            | 699.7521             | 525.0659             | 420.2542             |
| 2428.9743            | 3035.9660            | 4047.6190            | 6070.9248            | 12140.8423            | 112            | Q            | 18            | 1984.1576            | 992.5825             | 662.0574             | 496.7949             | 397.6373             |
| 2443.1817            | 3053.7253            | 4071.2980            | 6106.4434            | 12211.8795            | 113            | A            | 17            | 1856.0991            | 928.5532             | 619.3172             | 464.7802             | 372.0256             |
| 2462.9954            | 3078.4924            | 4104.3208            | 6155.9776            | 12310.9479            | 114            | V            | 16            | 1785.0619            | 893.0346             | 595.6922             | 447.0209             | 357.8182             |
| 2485.6122            | 3106.7834            | 4142.0155            | 6212.5196            | 12424.0319            | 115            | L            | 15            | 1685.9935            | 843.5004             | 562.6694             | 422.2538             | 338.0045             |
| <del>2508.2200</del> | <del>3136.0346</del> | <del>4179.7402</del> | <del>6269.0646</del> | <del>12537.1489</del> | <del>116</del> | <del>L</del> | <del>14</del> | <del>1572.9095</del> | <del>786.9584</del>  | <del>524.9747</del>  | <del>393.9828</del>  | <del>315.3877</del>  |
| 2527.6396            | 3159.2976            | 4212.0611            | 6317.5880            | 12634.1688            | 117            | P            | 13            | 1459.8254            | 768.4168             | 487.2068             | 365.7418             | 292.7768             |
| 2553.2596            | 3191.3214            | 4254.7594            | 6381.6355            | 12762.2637            | 118            | K            | 12            | 1362.7726            | 681.8900             | 454.9291             | 341.4486             | 273.3603             |
| 2578.8776            | 3223.3451            | 4297.4577            | 6445.6830            | 12890.3587            | 119            | K            | 11            | 1234.6777            | 617.8425             | 412.2307             | 309.4249             | 247.7414             |
| 2599.0871            | 3248.6070            | 4331.1403            | 6496.2068            | 12991.4064            | 120            | T            | 10            | 1106.5827            | 553.7950             | 369.5324             | 277.4011             | 222.1224             |
| 2624.8956            | 3280.8677            | 4374.1545            | 6560.7281            | 13120.4490            | 121            | E            | 9             | 1005.5350            | 503.2712             | 335.8499             | 252.1392             | 201.9128             |
| 2642.3020            | 3302.6257            | 4403.1652            | 6604.2441            | 13207.4810            | 122            | S            | 8             | 876.4924             | 438.7499             | 292.8357             | 219.8786             | 176.1043             |
| 2669.7138            | 3336.8904            | 4448.8515            | 6672.7736            | 13344.5399            | 123            | H            | 7             | 789.4604             | 395.2338             | 263.8250             | 198.1206             | 158.6979             |
| 2697.1256            | 3371.1552            | 4494.5378            | 6741.3030            | 13481.5988            | 124            | H            | 6             | 652.4015             | 326.7044             | 218.1387             | 163.8558             | 131.2861             |
| 2722.7446            | 3403.1789            | 4537.2361            | 6805.3505            | 13609.6938            | 125            | K            | 5             | 515.3426             | 258.1749             | 172.4524             | 129.5911             | 103.8743             |
| 2736.9520            | 3420.9382            | 4560.9151            | 6840.8691            | 13680.7309            | 126            | A            | 4             | 387.2476             | 194.1274             | 129.7541             | 97.5674              | 78.2553              |
| 2762.5710            | 3452.9619            | 4603.6135            | 6904.9166            | 13808.8259            | 127            | K            | 3             | 316.2105             | 158.6089             | 106.0750             | 79.8081              | 64.0479              |
| 2773.9753            | 3467.2173            | 4622.6206            | 6933.4273            | 13865.8473            | 128            | G            | 2             | 188.1155             | 94.5614              | 63.3767              | 47.7843              | 38.4289              |
| 2799.7911            | 3499.4870            | 4665.6469            | 6997.9668            | 13994.9263            | 129            | K            | 1             | 131.0941             | 66.0507              | 44.3695              | 33.5290              | 27.0246              |



Supplemental Figure 5

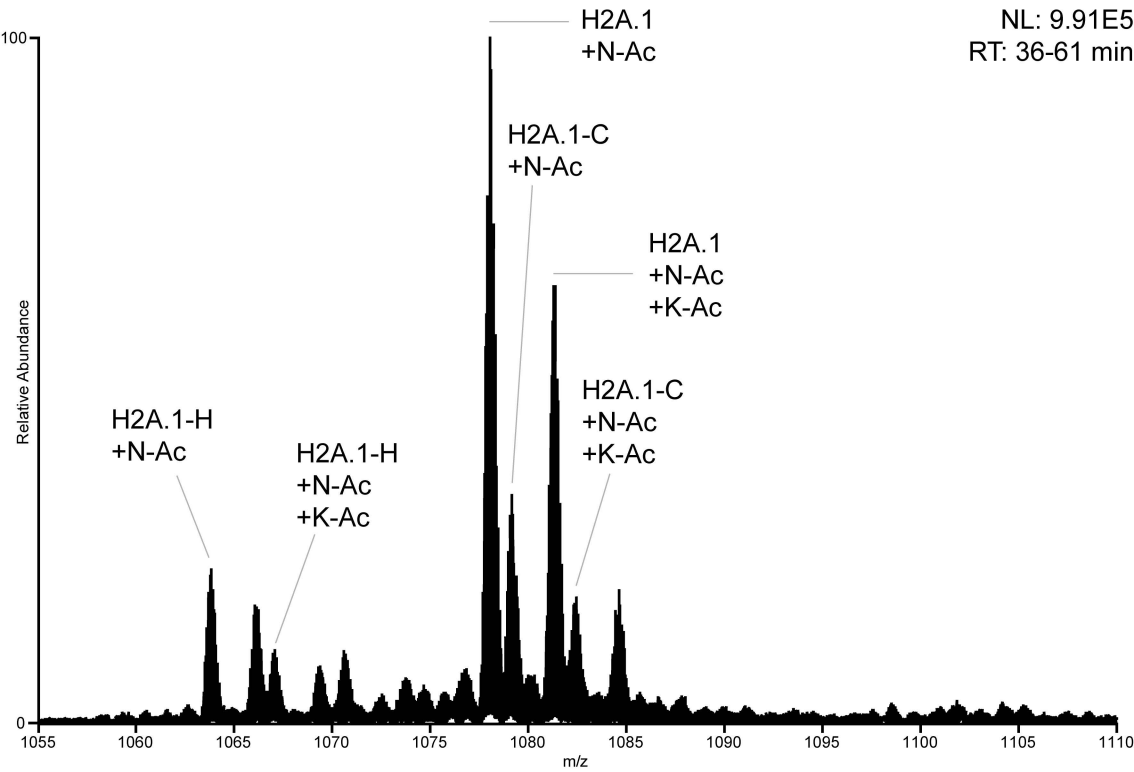

Supplemental Figure 6 A

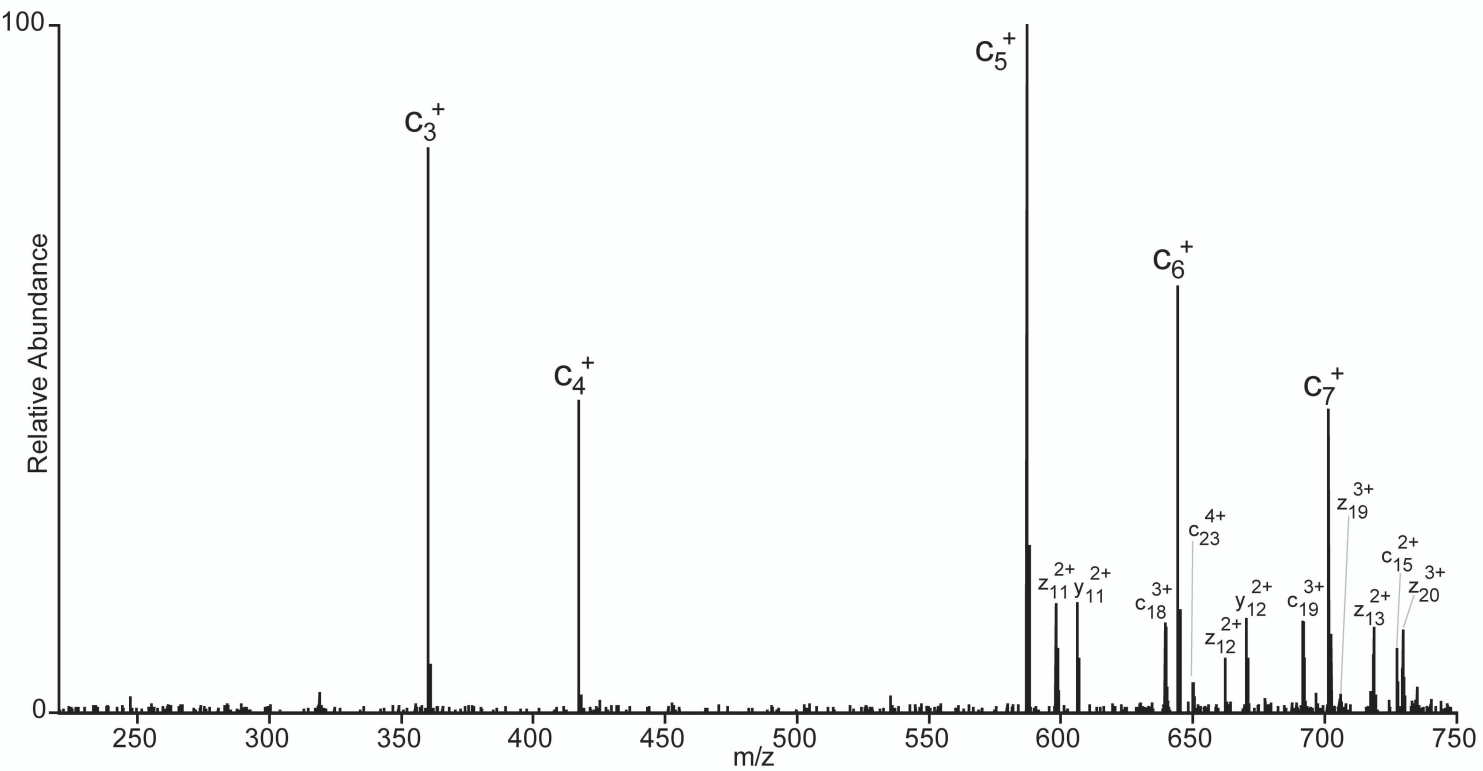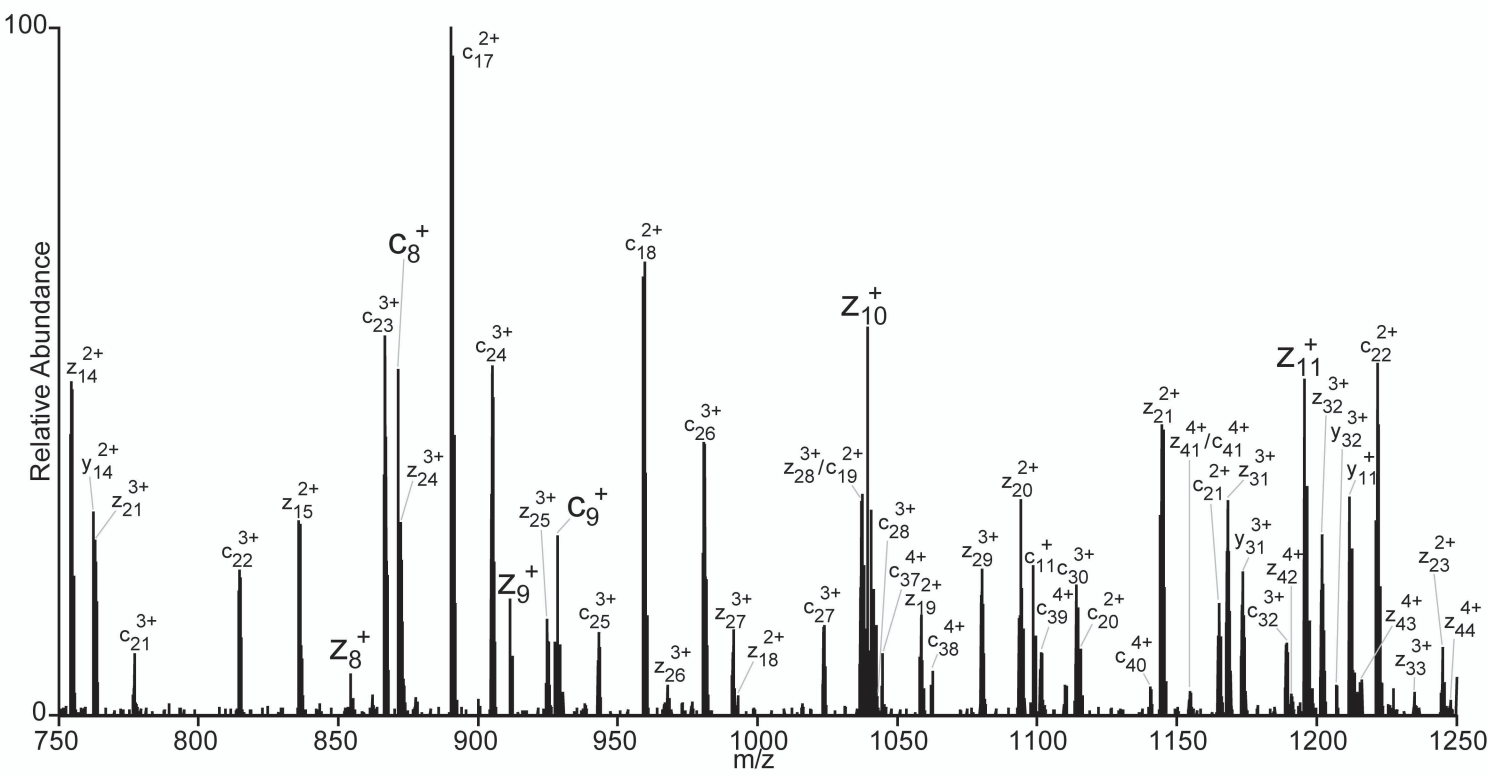

Supplemental Figure 6 B

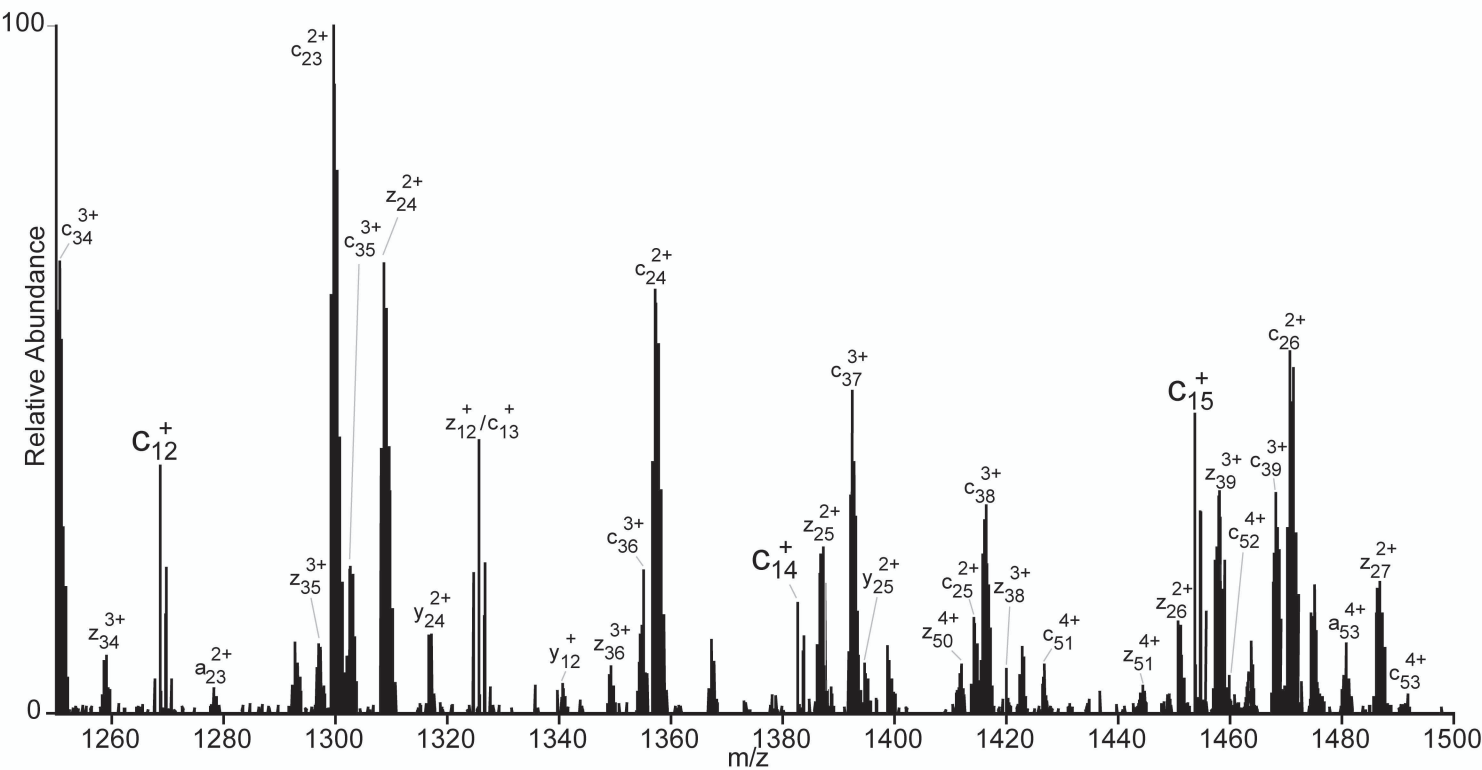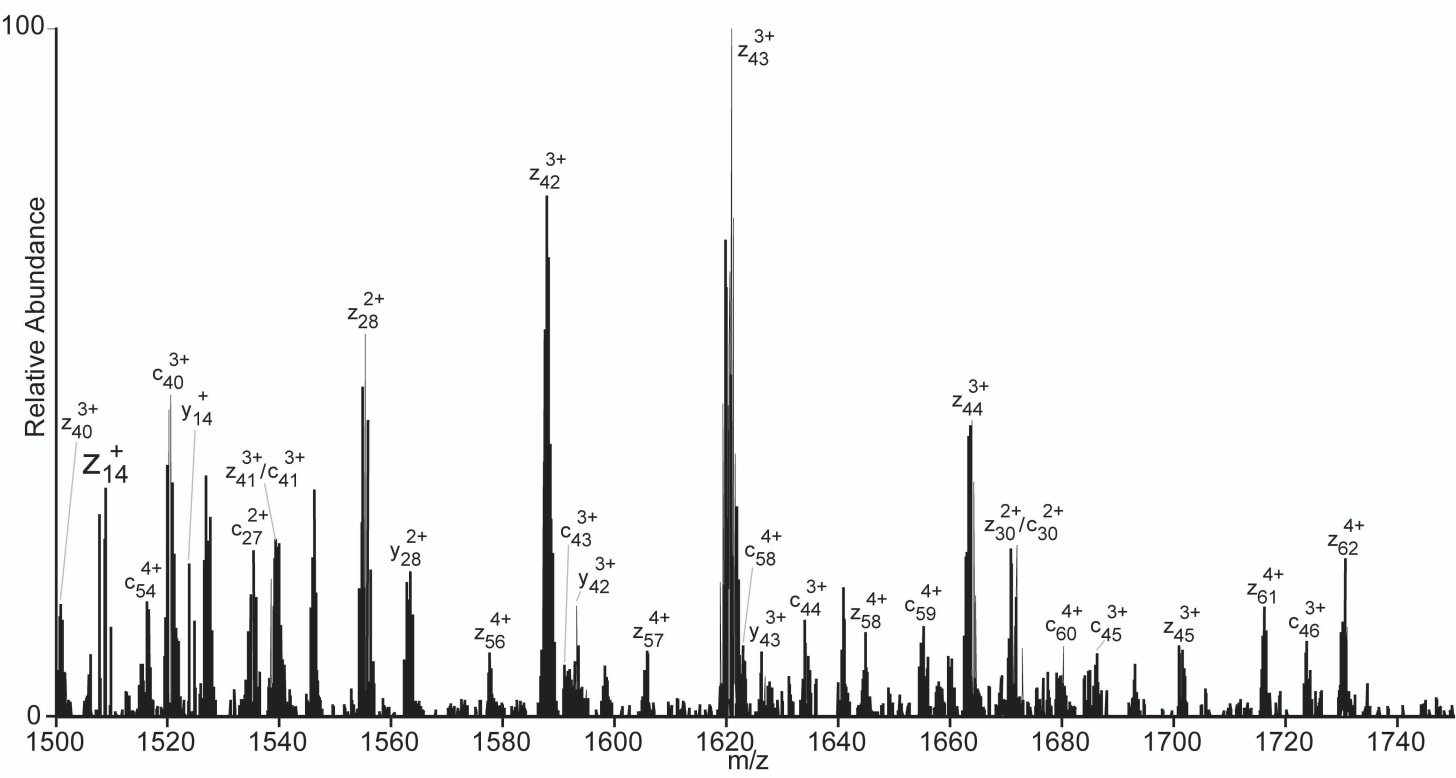

Supplemental Figure 6 C

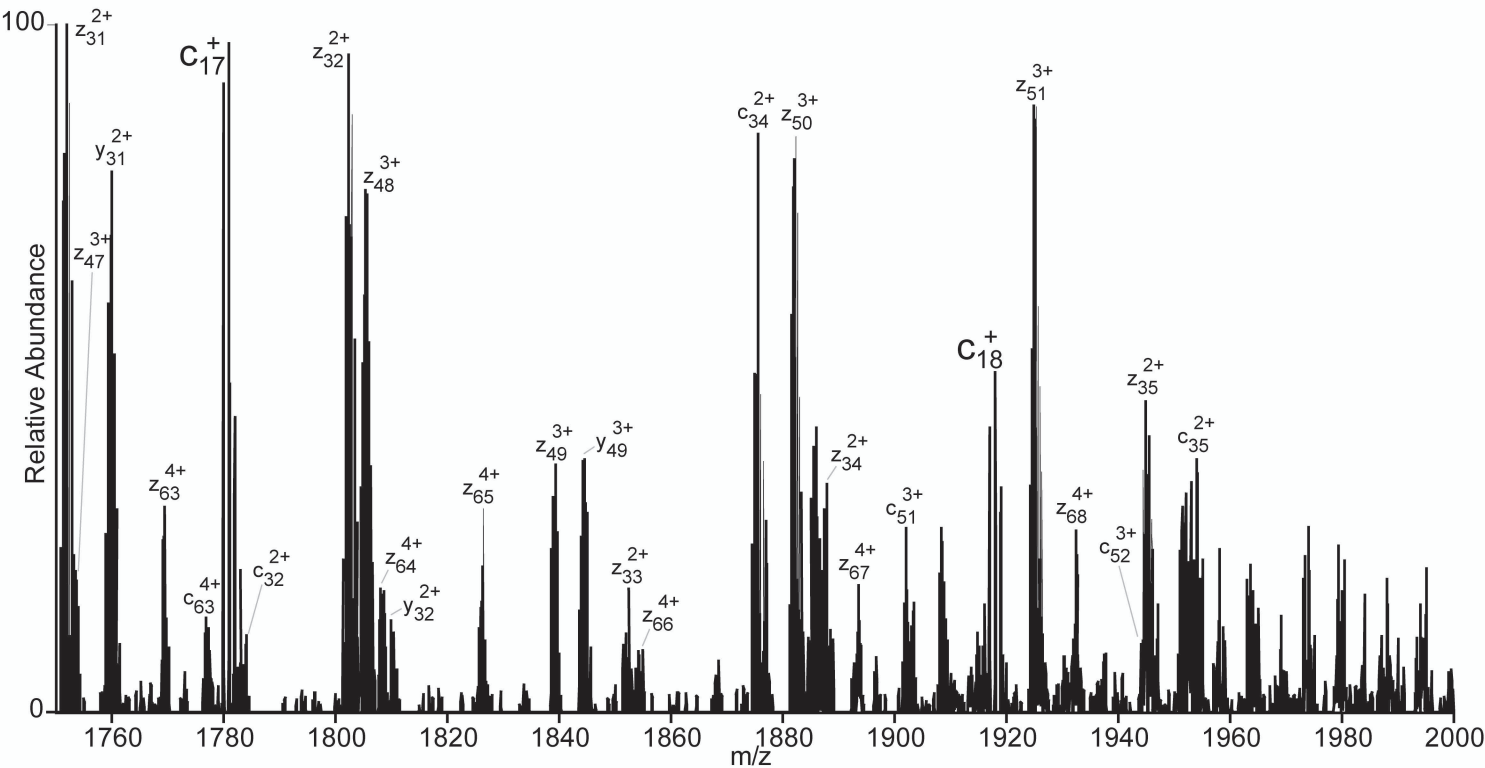

# Supplemental Figure 7 A B

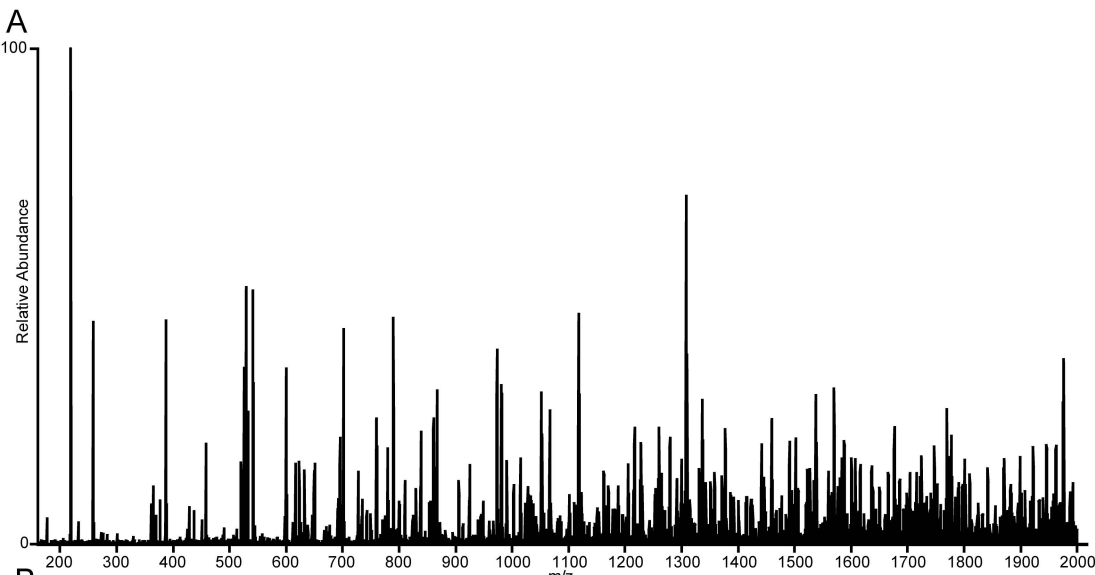

**B**

<sup>c-ions</sup>  
 AC- $\alpha$ N-S E] T] A P] A] A P] A] A P] A P A] E] K] T P] V] K] K] K] A] R] K] S] A] G] A] A] <sup>30</sup>  
 K] R] K] A] S] G P P V] S] E] L I T K] A] V] A] A] S] K] E] R] S] G] V] S] L] A] A]  
 L] K] K] A] L] A A A] G] Y] D] V] E] K] N] N] S] R I] K] L] G] L K] S] L] V] S] K G]  
 T L V] Q] T K G T G A S G S F K L N K K A A S G E A K P K] A K  
 K A] G A A] K A K K P A G] A A K K P K] K] A] T] G A A T P K] K] S A  
 K] K] T P K] K] A K] K] P A] A] A] A] G] A] K] K] A] K] S P] K] K] A] K] A] A] K P  
 K] K] A P] K] S P] A] K] A] K] A] V] K P] K] A] A] K P] K] T] A] K P] K] A] A] K P  
 K] K] A] A] A] K] K] K  
<sup>z<sup>+</sup>-ions</sup>

# Supplemental Figure 7 C D

C

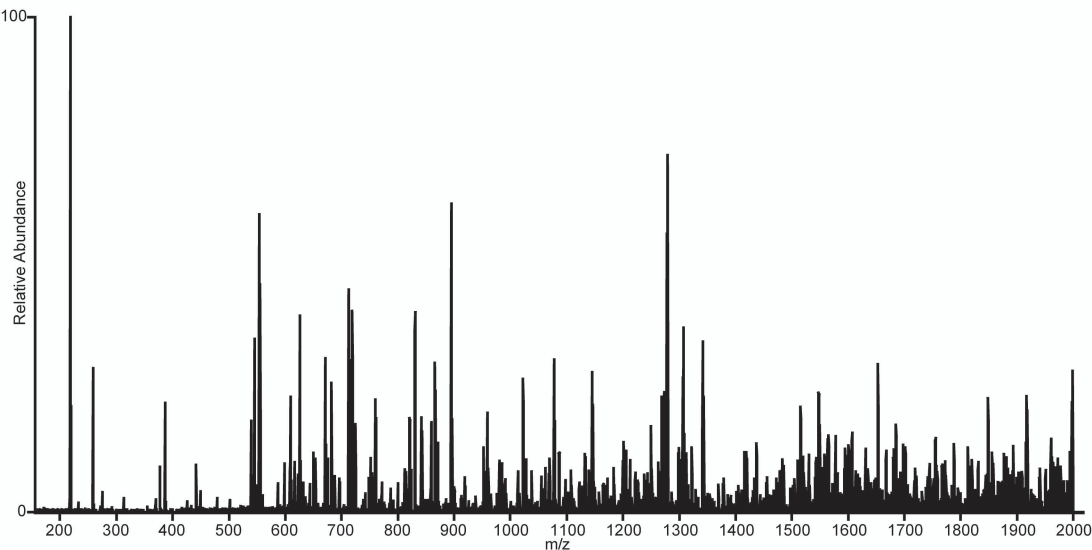

D

Ac- $\alpha$ N-S E T<sup>c-ions</sup> A P A A P A A P P A E K A P V K K K A A K K A G G T<sup>30</sup>

P R K A S G P P V S E L I T K A V A A S K E R S G V S L A A

L K K A L A A A G Y D V E K N N S R I K L G L K S L V S K G

T L V Q T K G T G A S G S F K L N K K A A S G E A K P K V K

K A G G T K P K K P V G A A K K P K K A A G G A T P K K S A

K K T P K K A K K P A A A T V T K K V A K S P K K A K V A K

P K K A A K S A A K A V K P K A A K P K V V K P K K A A P K

K K<sup>z+-ions</sup>

2 pmol H1 frac 25 MF, variable ETD/PTR

10/09/13 17:56:31

LCA\_10092013\_ButyratedTreatedHela\_H1fr...

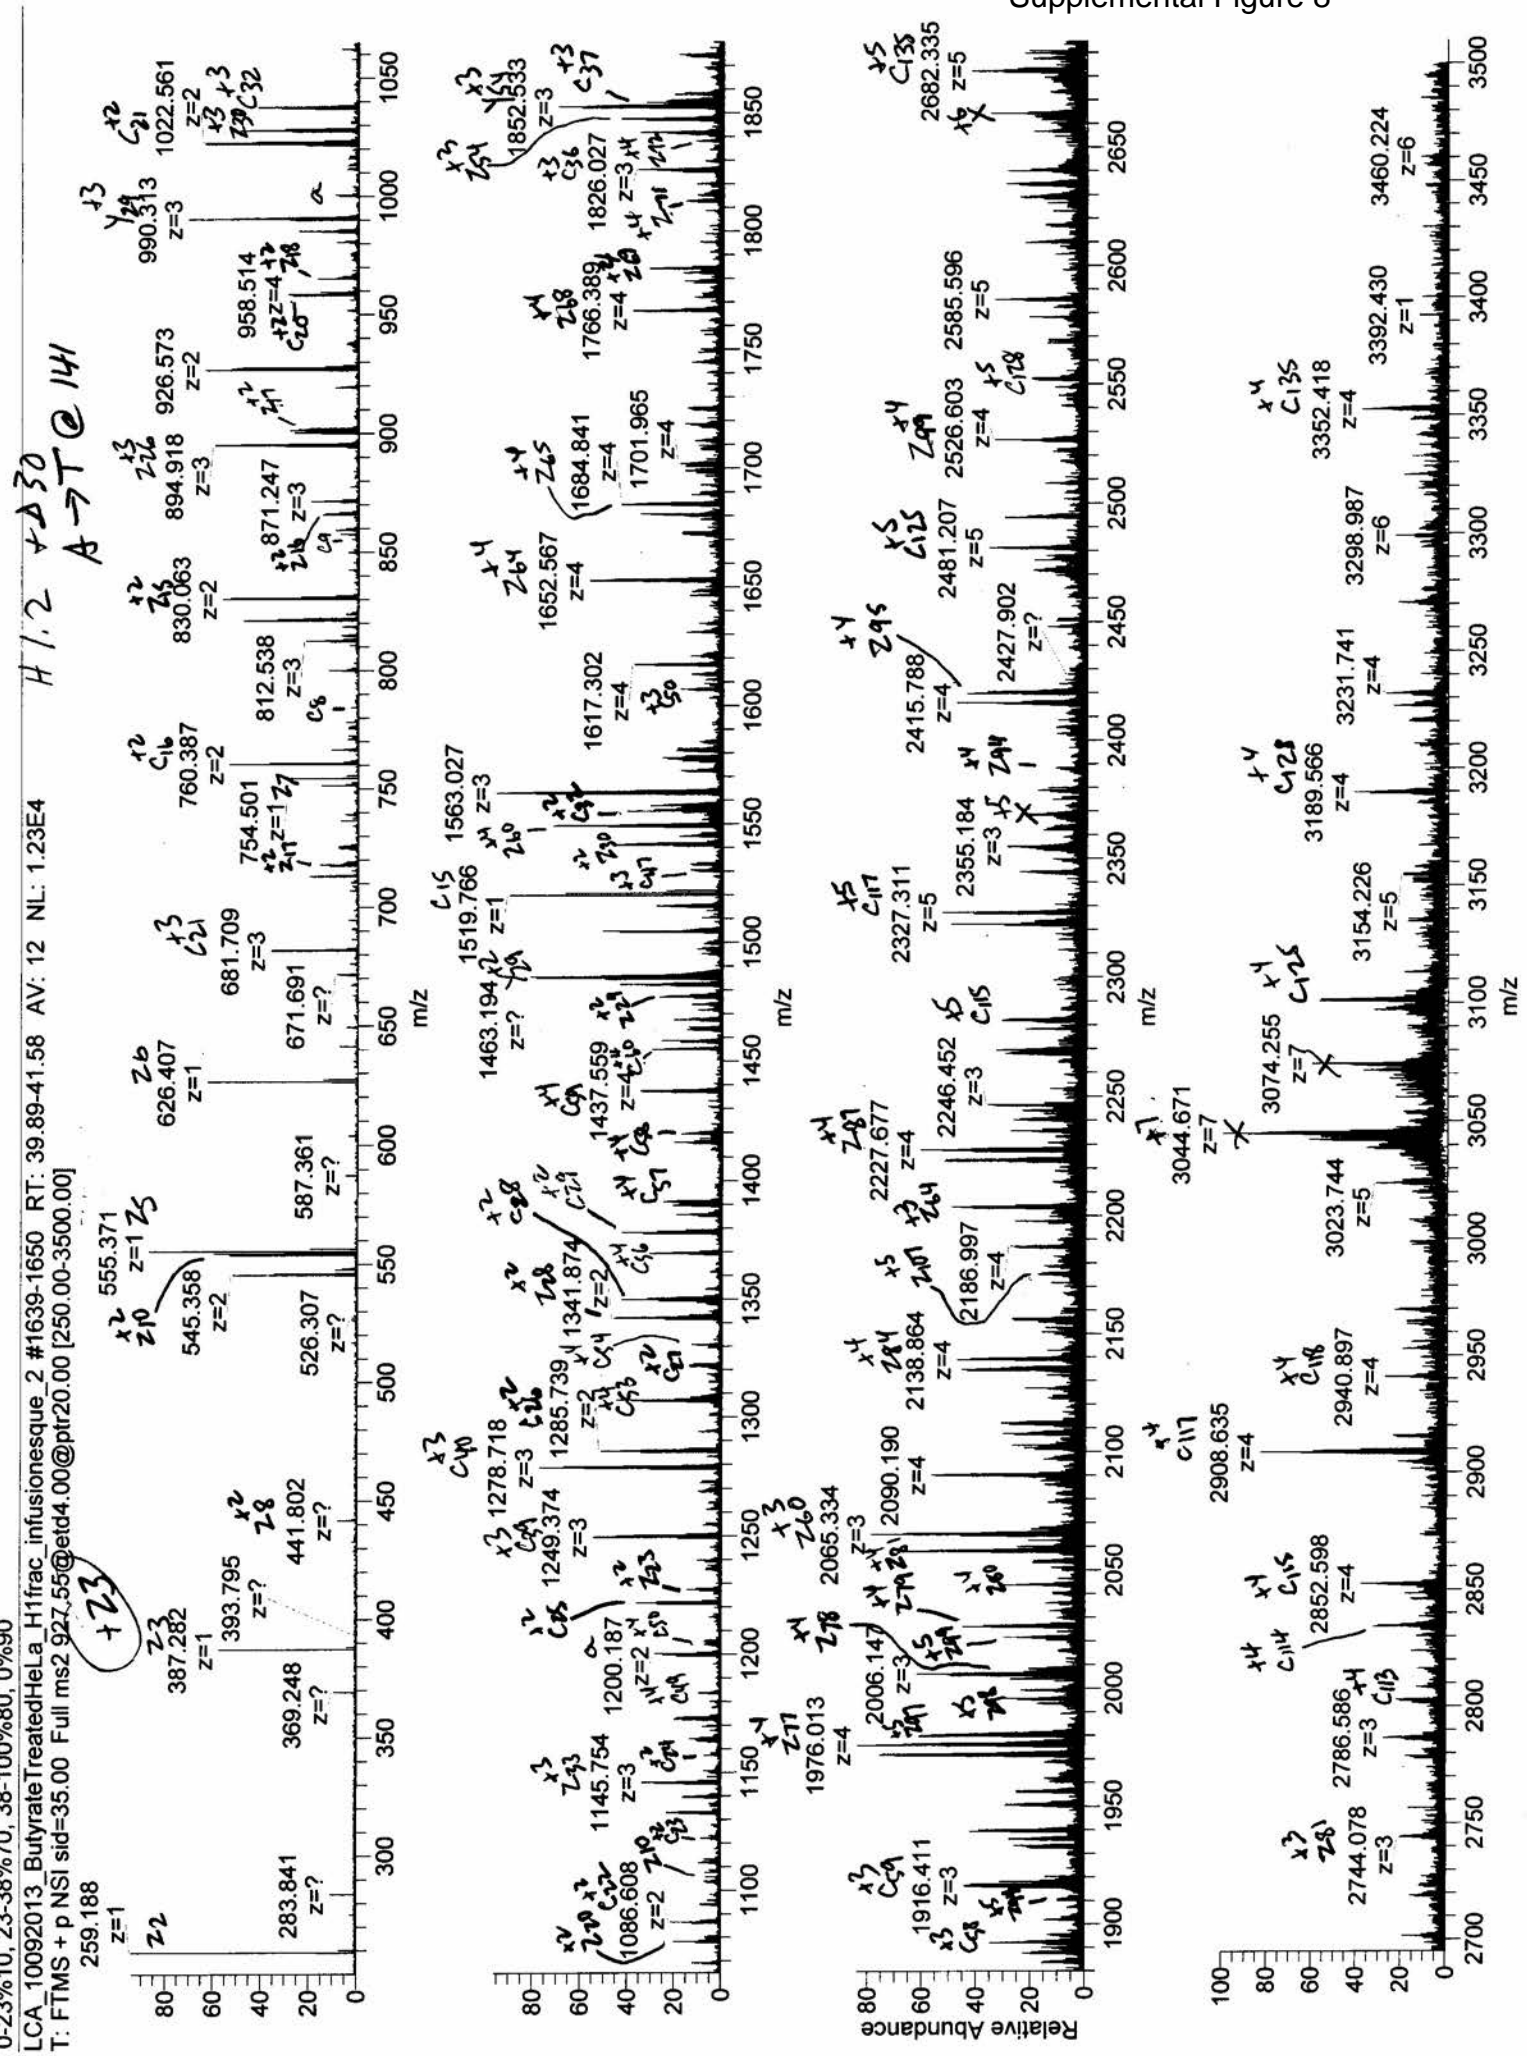

H1.2 + A30  
A → T @ 141

H1.2

A → T @ 141

**\*SETAPAAPAAPPAEKAPVKKKAACKAGGTPRKASGI**

|    | Charge | Monoisotopic Mass | Average Mass |
|----|--------|-------------------|--------------|
| 1  |        | 21293.7355        | 21308.70     |
| 2  |        | 10647.3714        | 10653.85     |
| 3  |        | 7098.5834         | 7102.90      |
| 4  |        | 5324.1893         | 5327.43      |
| 5  |        | 4259.5529         | 4262.15      |
| 6  |        | 3549.7953         | 3551.96      |
| 7  |        | 3042.8256         | 3044.68      |
| 8  |        | 2662.5983         | 2664.22      |
| 9  |        | 2366.8660         | 2368.31      |
| 10 |        | 2130.2801         | 2131.58      |
| 11 |        | 1936.7098         | 1937.89      |
| 12 |        | 1775.4013         | 1776.48      |
| 13 |        | 1638.9094         | 1639.91      |
| 14 |        | 1521.9164         | 1522.84      |
| 15 |        | 1420.5225         | 1421.39      |
| 16 |        | 1331.8028         | 1332.61      |
| 17 |        | 1253.5207         | 1254.28      |
| 18 |        | 1183.9366         | 1184.66      |
| 19 |        | 1121.6772         | 1122.38      |
| 20 |        | 1065.6437         | 1066.29      |
| 21 |        | 1014.9467         | 1015.56      |
| 22 |        | 968.8588          | 969.45       |
| 23 |        | 928.7781          | 927.34       |
| 24 |        | 888.2043          | 888.74       |
| 25 |        | 852.7164          | 853.24       |



H1 fraction 10092013 - que 2

Butgrate - Hela #1639-650 A → T@ 141

Supplemental Figure 8 (cont)

### Fragment Masses

| +8 c ions | +5 c ions | +4 c ions | +3 c ions | +2 c ions | +1 c ions | Sequence<br>(nterm + 42..) | +1 z ions | +2 z ions | +3 z ions  | +4 z ions  | +5 z ions | +6 z ions |           |           |
|-----------|-----------|-----------|-----------|-----------|-----------|----------------------------|-----------|-----------|------------|------------|-----------|-----------|-----------|-----------|
| 25.3521   | 30.2211   | 37.5248   | 49.8970   | 74.0419   | 147.0785  | 1                          | S         | 212       | 21293.7355 | 10647.3714 | 7098.5834 | 5324.1893 | 4259.5528 | 3549.7953 |
| 46.8592   | 56.2092   | 69.7852   | 92.7112   | 138.5632  | 278.1190  | 2                          | E         | 211       | 21148.8742 | 10574.8407 | 7050.2296 | 5287.9240 | 4230.5407 | 3525.6184 |
| 63.7005   | 76.2392   | 95.0471   | 126.3938  | 189.0870  | 377.1667  | 3                          | T         | 210       | 21019.8316 | 10510.3194 | 7007.2154 | 5255.8634 | 4204.7321 | 3504.1113 |
| 76.5408   | 90.4488   | 112.8084  | 150.0728  | 224.6056  | 448.3093  | 4                          | A         | 209       | 20918.5839 | 10459.7956 | 6973.5328 | 5230.4014 | 4184.5226 | 3487.2700 |
| 91.7155   | 109.8571  | 137.0696  | 182.4237  | 273.1319  | 545.2566  | 5                          | P         | 208       | 20817.3408 | 10414.2770 | 6940.6886 | 5212.9422 | 4170.3122 | 3475.0805 |
| 103.5550  | 124.0846  | 154.8289  | 206.1028  | 308.8505  | 616.2937  | 6                          | A         | 207       | 20750.4940 | 10375.7506 | 6917.5029 | 5188.3790 | 4150.9048 | 3459.2551 |
| 116.3045  | 138.2730  | 173.6882  | 230.7818  | 344.1801  | 687.3308  | 7                          | A         | 206       | 20679.4569 | 10340.2321 | 6893.8238 | 5170.6197 | 4136.8972 | 3447.4155 |
| 131.5700  | 157.6825  | 196.8514  | 262.1327  | 392.6954  | 784.3836  | 8                          | P         | 205       | 20606.4108 | 10304.7105 | 6870.1448 | 5162.9664 | 4122.4086 | 3435.9766 |
| 143.4095  | 171.8900  | 214.6106  | 285.8118  | 428.2140  | 855.4207  | 9                          | A         | 204       | 20511.3870 | 10258.1872 | 6837.7939 | 5128.5972 | 4103.9724 | 3418.4006 |
| 155.2490  | 188.0974  | 232.3699  | 309.4908  | 463.7328  | 926.4578  | 10                         | A         | 203       | 20440.3289 | 10220.6888 | 6814.1148 | 5100.8378 | 4088.8718 | 3407.5810 |
| 167.0886  | 200.3048  | 250.1292  | 333.1898  | 499.2511  | 997.4949  | 11                         | A         | 202       | 20369.2928 | 10185.1500 | 6790.4358 | 5083.0787 | 4074.6644 | 3395.7215 |
| 183.2840  | 216.7164  | 271.9924  | 366.5908  | 547.7375  | 1094.5477 | 12                         | P         | 201       | 20298.2567 | 10149.8816 | 6766.7667 | 5070.3184 | 4060.4370 | 3383.8820 |
| 199.4395  | 239.1259  | 298.8556  | 397.8717  | 596.3039  | 1191.8005 | 13                         | P         | 200       | 20224.2920 | 10114.1861 | 6744.4958 | 5051.8562 | 4041.0404 | 3367.7088 |
| 211.2790  | 253.3333  | 316.4149  | 421.5507  | 631.8224  | 1262.6378 | 14                         | A         | 199       | 20104.1502 | 10052.5787 | 6702.0549 | 5028.7930 | 4021.6359 | 3351.5311 |
| 232.7861  | 279.1419  | 348.8755  | 464.5646  | 696.3437  | 1391.8802 | 15                         | E         | 198       | 20033.1130 | 10017.0802 | 6678.3759 | 5009.0337 | 4007.4284 | 3339.6916 |
| 254.1353  | 304.7608  | 380.6992  | 507.2632  | 760.3912  | 1519.7751 | 16                         | K         | 197       | 19904.0705 | 9952.5389  | 6635.3817 | 4978.7731 | 3981.6199 | 3318.1845 |
| 266.9748  | 319.0988  | 398.1585  | 530.0493  | 796.0908  | 1590.8423 | 17                         | A         | 196       | 19775.9755 | 9888.4914  | 6592.6633 | 4944.7493 | 3956.0009 | 3298.8353 |
| 282.1502  | 338.3788  | 422.7217  | 563.2932  | 844.4361  | 1687.8650 | 18                         | P         | 195       | 19704.9304 | 9852.9726  | 6566.8643 | 4920.8901 | 3941.7985 | 3284.9656 |
| 298.8616  | 358.1925  | 447.4888  | 596.3160  | 893.9704  | 1786.9334 | 19                         | V         | 194       | 19607.8858 | 9804.4464  | 6536.6304 | 4902.7289 | 3922.3829 | 3268.8203 |
| 320.0108  | 383.8115  | 479.5126  | 639.0143  | 958.0178  | 1915.0284 | 20                         | K         | 193       | 19508.8172 | 9754.9122  | 6503.6106 | 4877.9598 | 3902.5693 | 3252.3099 |
| 341.3800  | 409.4305  | 511.5363  | 681.7126  | 1022.0653 | 2043.1234 | 21                         | K         | 192       | 19380.7222 | 9690.8848  | 6460.9123 | 4845.9380 | 3876.9503 | 3230.9598 |
| 362.7091  | 435.0495  | 543.5600  | 724.4110  | 1089.1128 | 2171.2183 | 22                         | K         | 191       | 19252.6273 | 9628.8173  | 6418.2139 | 4813.9123 | 3851.3313 | 3209.6106 |
| 374.5486  | 449.2569  | 561.3193  | 748.0900  | 1121.8314 | 2242.2554 | 23                         | A         | 190       | 19124.5323 | 9562.7698  | 6375.5158 | 4781.8885 | 3825.7123 | 3188.2614 |
| 386.3882  | 463.4643  | 579.0786  | 771.7890  | 1157.1499 | 2313.2925 | 24                         | A         | 189       | 19053.4952 | 9527.2512  | 6351.8368 | 4764.1293 | 3811.5049 | 3176.4219 |
| 407.7373  | 489.0833  | 611.1023  | 814.4674  | 1221.1974 | 2441.3875 | 25                         | K         | 188       | 18982.4581 | 9491.7327  | 6328.1575 | 4746.3700 | 3797.2974 | 3164.5824 |
| 429.0865  | 514.7023  | 643.1281  | 857.1657  | 1285.2449 | 2569.4825 | 26                         | K         | 187       | 18854.3631 | 9427.6852  | 6285.4592 | 4714.3462 | 3771.6784 | 3143.2332 |
| 440.9260  | 528.9097  | 660.8854  | 880.8447  | 1320.7634 | 2640.5196 | 27                         | A         | 186       | 18726.2682 | 9363.6377  | 6242.7609 | 4682.3225 | 3746.0595 | 3121.8841 |
| 450.4296  | 540.3140  | 675.1407  | 899.8519  | 1349.2742 | 2697.5411 | 28                         | G         | 185       | 18655.2310 | 9328.1192  | 6219.0819 | 4664.5632 | 3731.8520 | 3110.0446 |
| 459.9331  | 551.7183  | 689.3961  | 918.8590  | 1377.7849 | 2754.5625 | 29                         | T         | 184       | 18598.2096 | 9299.6084  | 6200.0747 | 4650.3079 | 3720.4477 | 3100.5410 |
| 476.3744  | 574.0370  | 714.6680  | 954.5446  | 1438.3987 | 2856.8402 | 30                         | G         | 183       | 18541.1881 | 9271.0977  | 6181.0676 | 4636.0525 | 3709.0434 | 3091.0374 |
| 492.9499  | 591.3384  | 738.9212  | 984.8925  | 1476.8351 | 2952.8630 | 31                         | P         | 182       | 18440.4404 | 9229.5790  | 6147.9850 | 4619.7996 | 3689.8390 | 3084.4901 |
| 518.9687  | 622.5588  | 777.9485  | 1038.9262 | 1554.8857 | 3108.7841 | 32                         | R         | 181       | 18343.0877 | 9172.0475  | 6115.0341 | 4586.5274 | 3669.4234 | 3068.0207 |
| 540.3159  | 648.1776  | 809.9702  | 1079.6245 | 1618.9332 | 3236.8590 | 33                         | K         | 180       | 18186.9866 | 9093.9969  | 6063.0004 | 4547.5021 | 3638.2031 | 3032.0038 |
| 552.1554  | 662.3851  | 827.7295  | 1103.3038 | 1654.4517 | 3307.8961 | 34                         | A         | 179       | 18058.8916 | 9029.9494  | 6020.3020 | 4515.4784 | 3612.5841 | 3010.8547 |
| 566.8608  | 679.7915  | 849.4875  | 1132.3142 | 1697.0677 | 3394.9282 | 35                         | S         | 178       | 17987.8545 | 8994.4309  | 5998.6230 | 4497.7191 | 3598.3767 | 2998.8151 |
| 578.1643  | 691.1967  | 863.7420  | 1161.0214 | 1726.4766 | 3451.9492 | 36                         | G         | 177       | 17900.8225 | 8950.9149  | 5967.6123 | 4475.9611 | 3580.9703 | 2984.3098 |
| 582.3368  | 710.8063  | 883.0081  | 1183.6732 | 1776.0948 | 3540.9924 | 37                         | P         | 176       | 17816.8048 | 8926.4044  | 5946.9652 | 4461.7067 | 3569.5860 | 2974.8062 |
| 608.5153  | 730.0169  | 912.2892  | 1216.0232 | 1823.5312 | 3646.0552 | 38                         | P         | 175       | 17746.7482 | 8876.8778  | 5916.2543 | 4447.4426 | 3550.1555 | 2966.6398 |
| 625.0267  | 749.8305  | 937.0364  | 1249.0460 | 1873.0654 | 3745.1236 | 39                         | V         | 174       | 17649.6955 | 8825.3514  | 5883.9033 | 4431.1793 | 3530.7449 | 2942.4553 |
| 639.5320  | 767.2369  | 958.7944  | 1278.0567 | 1916.5814 | 3832.1556 | 40                         | S         | 173       | 17550.6270 | 8775.8172  | 5850.8805 | 4388.4122 | 3510.9312 | 2925.9439 |
| 661.0391  | 793.0455  | 991.0550  | 1321.0709 | 1981.1027 | 3961.1982 | 41                         | E         | 172       | 17483.5950 | 8732.3011  | 5821.8699 | 4368.6542 | 3493.5248 | 2911.4386 |
| 679.8864  | 815.6623  | 1019.3260 | 1358.7656 | 2037.8448 | 4074.2823 | 42                         | L         | 171       | 17334.5524 | 8667.7799  | 5778.8557 | 4334.3936 | 3467.7163 | 2889.9315 |
| 698.7338  | 838.2791  | 1047.5970 | 1396.4603 | 2094.1888 | 4187.3663 | 43                         | I         | 170       | 17221.4684 | 8611.2378  | 5741.1810 | 4308.1225 | 3445.0995 | 2871.0841 |
| 715.5751  | 858.4886  | 1072.8590 | 1430.1429 | 2144.7106 | 4288.4140 | 44                         | T         | 169       | 17108.3843 | 8554.6958  | 5703.4663 | 4277.8515 | 3422.4827 | 2852.2368 |
| 736.9242  | 884.1076  | 1104.8827 | 1472.8412 | 2208.7581 | 4416.5090 | 45                         | K         | 168       | 17007.3366 | 8504.1719  | 5668.7837 | 4252.5896 | 3402.2731 | 2835.3955 |
| 748.7637  | 898.3150  | 1122.6420 | 1496.5202 | 2244.2767 | 4487.5461 | 46                         | A         | 167       | 16879.2417 | 8440.1245  | 5627.0854 | 4220.5659 | 3376.6542 | 2814.0463 |
| 765.2751  | 918.1287  | 1147.4091 | 1529.5430 | 2293.8109 | 4586.6145 | 47                         | V         | 166       | 16808.2045 | 8404.6059  | 5603.4064 | 4202.8066 | 3362.4467 | 2802.2068 |
| 777.1147  | 932.3361  | 1165.1684 | 1553.2221 | 2329.3294 | 4657.6516 | 48                         | A         | 165       | 16709.1361 | 8355.0717  | 5570.3836 | 4178.0393 | 3342.6330 | 2785.6954 |
| 788.9542  | 946.5438  | 1182.9276 | 1578.9011 | 2364.8480 | 4728.6887 | 49                         | A         | 164       | 16638.0990 | 8319.5531  | 5548.7045 | 4160.2802 | 3328.4256 | 2773.8559 |
| 803.4595  | 963.9500  | 1204.6856 | 1605.9118 | 2408.3840 | 4815.7208 | 50                         | S         | 163       | 16567.0619 | 8284.0346  | 5523.0255 | 4142.5209 | 3314.2182 | 2762.0164 |
| 824.8087  | 989.5690  | 1238.7094 | 1648.8101 | 2472.4115 | 4943.8157 | 51                         | K         | 162       | 16480.0299 | 8240.5186  | 5494.0148 | 4120.7628 | 3298.8118 | 2747.5110 |
| 846.3158  | 1015.3775 | 1268.9700 | 1691.6243 | 2536.8328 | 5072.8593 | 52                         | E         | 161       | 16351.9349 | 8176.4711  | 5451.3165 | 4088.7392 | 3271.1928 | 2728.1819 |
| 872.3326  | 1048.5977 | 1307.9953 | 1743.8580 | 2614.9834 | 5228.9594 | 53                         | R         | 160       | 16222.8923 | 8111.9498  | 5408.3023 | 4056.4785 | 3245.3843 | 2704.6548 |
| 886.8380  | 1064.0041 | 1329.7533 | 1772.6687 | 2658.4994 | 5315.9915 | 54                         | S         | 159       | 16066.7912 | 8033.8992  | 5358.2886 | 4017.4533 | 3214.1641 | 2678.6379 |
| 896.3416  | 1075.4084 | 1344.0087 | 1791.6758 | 2687.0101 | 5373.0129 | 55                         | G         | 158       | 15979.7592 | 7990.3832  | 5327.2579 | 3995.6953 | 3198.7577 | 2664.1326 |
| 912.8530  | 1095.2221 | 1368.7758 | 1824.6986 | 2736.5443 | 5472.0813 | 56                         | V         | 157       | 15922.7377 | 7961.8725  | 5308.2508 | 3981.4399 | 3185.3534 | 2654.6290 |
| 927.3583  | 1112.6285 | 1390.5338 | 1853.7093 | 2780.0603 | 5559.1134 | 57                         | S         | 156       | 15823.6693 | 7912.3383  | 5275.2279 | 3956.6728 | 3165.5397 | 2638.1176 |
| 946.2056  | 1135.2453 | 1418.8048 | 1891.4040 | 2836.6024 | 5672.1974 | 58                         | L         | 155       | 15736.6373 | 7868.8223  | 5246.2173 | 3934.9148 | 3148.1333 | 2623.6123 |
| 958.0452  | 1149.4527 | 1438.5641 | 1915.0830 | 2872.1209 | 5743.2345 | 59                         | A         | 154       | 15623.5532 | 7812.2802  | 5208.5226 | 3906.6438 | 3125.5165 | 2604.7649 |
| 969.8847  | 1163.6602 | 1454.3234 | 1938.7821 | 2907.6395 | 5814.2717 | 60                         | A         | 153       | 15552.5161 | 7776.7817  | 5184.8435 | 3888.8845 | 3111.3090 | 2592.9254 |
| 988.7320  | 1186.2770 | 1482.5944 | 1976.4588 | 2964.1815 | 5927.3557 | 61                         | L         | 152       | 15481.4790 | 7741.2431  | 5161.1845 | 3871.1252 | 3097.1018 | 2581.0859 |
| 1010.0812 | 1211.8960 | 1514.8181 | 2019.1551 | 3028.2290 | 6055.4507 | 62                         | K         | 151       | 15368.3949 | 7684.7011  | 5123.4698 | 3842.8542 | 3074.4848 | 2562.2385 |
| 1031.4303 | 1237.5150 | 1546.8419 | 2061.8534 | 3092.2765 | 6183.5456 | 63                         | K         | 150       | 15240.2999 | 7620.6536  | 5080.7715 | 3810.8304 | 3048.8658 | 2540.8894 |
| 1043.2699 |           |           |           |           |           |                            |           |           |            |            |           |           |           |           |

H1 fraction 10092013... que Z.

Butyrate - Hela #1639-1650

A → T @ 141

### Fragment Masses

| +6 c ions | +5 c ions | +4 c ions | +3 c ions | +2 c ions | +1 c ions  | Sequence | +1 z ions  | +2 z ions | +3 z ions | +4 z ions | +5 z ions | +6 z ions |           |
|-----------|-----------|-----------|-----------|-----------|------------|----------|------------|-----------|-----------|-----------|-----------|-----------|-----------|
| 1433.4885 | 1719.9847 | 2148.7291 | 2685.9697 | 4298.4509 | 8595.8945  | 87       | 12612.9401 | 8406.9737 | 4271.6516 | 3203.9905 | 2563.3939 | 2136.3294 |           |
| 1449.9989 | 1739.9874 | 2174.4962 | 2698.9925 | 4347.9851 | 8694.9630  | 88       | 12699.8561 | 8350.4317 | 4233.9569 | 3175.7195 | 2540.7770 | 2117.4821 |           |
| 1464.5052 | 1757.2048 | 2196.2542 | 2728.0032 | 4391.5011 | 8781.9950  | 89       | 12800.7877 | 8300.8975 | 4200.9341 | 3150.8524 | 2520.9634 | 2100.9707 |           |
| 1485.8544 | 1782.8238 | 2228.2779 | 2970.7015 | 4455.5486 | 8910.0900  | 90       | 12513.7556 | 8257.3815 | 4171.9234 | 3128.1944 | 2503.5569 | 2086.4653 |           |
| 1495.3580 | 1794.2281 | 2242.5333 | 2989.7087 | 4484.0593 | 8987.1114  | 90       | 12385.8607 | 8193.3340 | 4129.2251 | 3097.1706 | 2477.9380 | 2065.1162 |           |
| 1512.1992 | 1814.4376 | 2267.7952 | 3023.3912 | 4534.5832 | 9088.1591  | 91       | 12328.8392 | 8184.8232 | 4110.2179 | 3082.9153 | 2466.5337 | 2055.6126 |           |
| 1531.0486 | 1837.0545 | 2296.0662 | 3061.0859 | 4591.1252 | 9181.2432  | 92       | 12227.5915 | 8114.2994 | 4085.8179 | 3004.6152 | 2403.8936 | 2033.4126 |           |
| 1547.5580 | 1856.8881 | 2320.8333 | 3094.1087 | 4640.8594 | 9280.3116  | 93       | 12114.5075 | 8057.7574 | 4038.8407 | 3029.3823 | 2423.7073 | 2019.9240 |           |
| 1588.9011 | 1882.4799 | 2352.8480 | 3136.7949 | 4704.8887 | 9408.3701  | 94       | 12015.4391 | 8008.2232 | 4005.8179 | 3004.6152 | 2403.8936 | 2033.4126 |           |
| 1585.7424 | 1902.6894 | 2378.1089 | 3170.4775 | 4755.2126 | 9509.4178  | 95       | 11887.3805 | 7944.1939 | 3963.1317 | 2972.8006 | 2378.2819 | 1982.0695 |           |
| 1607.0915 | 1928.3084 | 2410.1337 | 3213.1758 | 4819.2600 | 9637.5128  | 96       | 11786.3328 | 7893.6700 | 3929.4491 | 2947.3389 | 2358.0724 | 1965.2282 |           |
| 1618.5951 | 1939.7127 | 2424.3890 | 3232.1829 | 4847.7708 | 9684.5343  | 97       | 11658.2378 | 7829.6228 | 3886.7508 | 2915.3149 | 2332.4534 | 1943.8790 |           |
| 1633.4384 | 1959.9222 | 2449.6509 | 3265.8655 | 4898.2948 | 9785.5819  | 98       | 11601.2184 | 7801.1118 | 3867.7438 | 2901.0596 | 2321.0491 | 1934.3755 |           |
| 1642.9400 | 1971.3285 | 2463.9063 | 3284.8727 | 4926.8053 | 9852.6034  | 99       | 11500.1687 | 7750.5880 | 3834.0611 | 2875.7976 | 2300.8396 | 1917.5342 |           |
| 1654.7795 | 1985.5339 | 2481.6856 | 3308.5517 | 4962.3239 | 9923.6405  | 100      | 11443.1472 | 7722.0773 | 3815.0539 | 2861.5420 | 2289.4353 | 1908.0306 |           |
| 1669.2848 | 2002.9403 | 2503.4236 | 3337.5624 | 5005.8399 | 10010.6725 | 101      | 11372.1101 | 7688.5587 | 3791.3749 | 2843.7833 | 2275.2278 | 1896.1911 |           |
| 1678.7884 | 2014.3446 | 2517.6790 | 3356.5895 | 5034.3506 | 10067.6940 | 102      | 11285.0781 | 7643.0427 | 3762.3642 | 2822.0250 | 2257.8214 | 1881.8857 |           |
| 1693.2937 | 2031.7510 | 2539.4370 | 3385.5802 | 5077.8687 | 10154.7260 | 103      | 11228.0566 | 7614.5319 | 3743.3571 | 2807.7696 | 2246.4171 | 1872.1822 |           |
| 1717.8051 | 2061.1647 | 2576.2041 | 3434.6030 | 5151.4009 | 10301.7944 | 104      | 11141.0246 | 7571.0159 | 3714.3464 | 2786.0116 | 2229.0107 | 1857.6768 |           |
| 1739.1543 | 2086.7837 | 2608.2278 | 3477.3013 | 5215.4483 | 10429.8894 | 105      | 10993.9562 | 7497.4817 | 3685.3236 | 2749.2445 | 2199.5971 | 1833.1654 |           |
| 1758.0018 | 2109.4005 | 2636.4988 | 3514.9990 | 5271.9904 | 10542.8735 | 106      | 10865.8612 | 7433.4342 | 3622.6253 | 2717.2208 | 2173.9781 | 1811.8163 |           |
| 1777.0088 | 2132.2091 | 2665.0096 | 3553.0103 | 5329.0118 | 10657.0184 | 107      | 10752.7772 | 7376.8922 | 3584.9306 | 2688.9487 | 2151.3613 | 1792.9689 |           |
| 1798.3580 | 2157.8281 | 2697.0333 | 3595.7088 | 5393.0593 | 10785.1114 | 108      | 10638.7342 | 7319.8708 | 3546.9183 | 2660.4300 | 2128.5527 | 1773.9818 |           |
| 1819.7071 | 2183.4471 | 2729.0570 | 3638.4070 | 5457.1088 | 10913.2063 | 109      | 10510.6393 | 7255.8233 | 3504.2179 | 2628.4153 | 2102.9337 | 1752.6124 |           |
| 1831.5466 | 2197.6545 | 2746.8163 | 3662.0860 | 5492.6254 | 10984.2434 | 110      | 10382.5443 | 7191.7758 | 3461.5196 | 2596.3915 | 2077.3147 | 1731.2834 |           |
| 1843.3882 | 2211.8619 | 2764.5756 | 3685.7650 | 5528.1439 | 11055.2806 | 111      | 10211.5072 | 7156.2572 | 3437.8406 | 2578.6323 | 2063.1073 | 1719.4239 |           |
| 1857.8915 | 2229.2683 | 2786.3336 | 3714.7757 | 5571.6599 | 11142.3126 | 112      | 10240.4701 | 7120.7387 | 3414.1815 | 2560.7890 | 2048.8998 | 1707.5844 |           |
| 1867.3951 | 2240.6726 | 2800.5890 | 3733.7829 | 5600.1707 | 11199.3341 | 113      | 10153.4380 | 7077.2227 | 3385.1509 | 2539.1150 | 2031.4934 | 1693.0791 |           |
| 1888.9022 | 2268.4811 | 2832.8498 | 3776.7971 | 5664.6920 | 11328.3768 | 114      | 10096.4166 | 7048.7119 | 3366.1347 | 2524.8596 | 2020.0891 | 1683.5755 |           |
| 1900.7417 | 2280.6886 | 2850.6089 | 3800.4761 | 5700.2105 | 11399.4138 | 115      | 9967.3740  | 6984.1906 | 3323.1295 | 2492.5990 | 1994.2806 | 1662.0684 |           |
| 1922.0000 | 2306.3076 | 2882.8236 | 3843.4744 | 5784.2586 | 11453.4587 | 116      | 9898.3369  | 6948.6721 | 3298.4505 | 2474.8397 | 1980.0732 | 1650.2289 |           |
| 1938.2683 | 2325.7181 | 2906.8958 | 3875.5253 | 5812.7844 | 11624.5615 | 117      | 9788.2449  | 6884.6646 | 3266.7322 | 2442.6139 | 1954.4342 | 1628.8797 |           |
| 1959.6155 | 2351.3371 | 2938.9196 | 3918.2237 | 5876.8319 | 11752.6584 | 118      | 95         | 9671.1891 | 4838.0982 | 3224.4012 | 2418.5527 | 1935.0436 | 1612.7043 |
| 1976.1289 | 2371.1508 | 2963.6867 | 3951.2465 | 5926.3661 | 11851.7249 | 119      | 9543.0942  | 4772.0507 | 3181.7029 | 2388.5290 | 1909.4247 | 1591.3551 |           |
| 1997.4760 | 2396.7898 | 2995.7104 | 3993.8448 | 5990.4136 | 11979.8198 | 120      | 9444.0258  | 4722.5165 | 3148.8801 | 2361.7819 | 1889.6110 | 1574.8437 |           |
| 2018.8252 | 2422.3888 | 3027.7342 | 4036.8431 | 6054.4610 | 12107.9148 | 121      | 9315.9308  | 4658.4690 | 3105.9818 | 2329.7818 | 1863.9920 | 1553.4945 |           |
| 2030.6647 | 2436.5962 | 3045.4934 | 4060.3222 | 6089.9792 | 12178.9519 | 122      | 9187.8358  | 4594.4218 | 3083.2635 | 2297.7144 | 1838.3730 | 1532.1454 |           |
| 2040.1683 | 2448.0005 | 3059.7488 | 4079.3293 | 6118.4903 | 12235.9734 | 123      | 9116.7987  | 4558.9030 | 3039.6049 | 2279.9551 | 1824.1656 | 1520.3059 |           |
| 2049.6719 | 2459.4048 | 3074.0042 | 4098.3365 | 6147.0011 | 12292.9948 | 124      | 9059.7773  | 4530.3923 | 3020.5973 | 2265.8998 | 1812.7613 | 1510.8023 |           |
| 2068.5131 | 2479.8143 | 3098.2681 | 4132.0190 | 6197.5249 | 12394.0425 | 125      | 88         | 9002.7558 | 4501.8815 | 3001.5901 | 1801.3570 | 1501.2987 |           |
| 2087.3633 | 2500.3332 | 3124.8995 | 4174.7473 | 6264.4724 | 12522.0675 | 126      | 87         | 8901.7081 | 4451.3577 | 2987.9076 | 1786.1474 | 1484.4574 |           |
| 2104.0378 | 2524.8439 | 3155.5530 | 4207.0683 | 6310.0988 | 12619.1902 | 127      | 86         | 8773.6432 | 4387.3498 | 2926.2992 | 1764.4567 | 1465.6895 |           |
| 2125.3889 | 2550.2626 | 3187.5768 | 4249.7866 | 6374.1482 | 12747.2852 | 128      | 85         | 8676.5604 | 4338.7838 | 2892.8583 | 1748.9958 | 1446.9328 |           |
| 2140.7001 | 2575.6816 | 3219.6005 | 4292.4649 | 6446.1967 | 12876.3802 | 129      | 84         | 8548.4654 | 4274.7364 | 2850.1800 | 1737.8718 | 1428.5836 |           |
| 2162.9116 | 2595.2924 | 3243.8637 | 4324.8158 | 6486.7201 | 12972.4329 | 130      | 83         | 8460.6795 | 4216.6886 | 2807.1017 | 1716.5461 | 1404.8796 |           |
| 2179.4230 | 2615.1061 | 3268.6308 | 4357.8386 | 6536.2543 | 13071.5013 | 131      | 82         | 8323.3177 | 4162.1625 | 2775.1108 | 1691.5849 | 1388.0590 |           |
| 2188.9285 | 2626.5104 | 3282.8862 | 4376.8458 | 6564.7650 | 13128.5228 | 132      | 81         | 8224.2493 | 4112.6283 | 2742.0587 | 1674.6557 | 1371.5476 |           |
| 2200.7680 | 2640.7178 | 3300.8454 | 4400.5248 | 6600.2836 | 13199.5599 | 133      | 80         | 8167.2278 | 4084.1176 | 2723.0808 | 1654.2514 | 1362.0440 |           |
| 2212.8056 | 2654.9252 | 3318.4047 | 4424.2039 | 6635.8022 | 13270.5970 | 134      | 79         | 8096.1907 | 4048.5990 | 2699.4018 | 1620.0440 | 1350.2045 |           |
| 2233.9547 | 2680.5442 | 3350.4285 | 4468.9022 | 6699.8496 | 13398.8920 | 135      | 78         | 8025.1536 | 4013.0804 | 2675.7227 | 1607.0439 | 1338.3650 |           |
| 2255.3039 | 2706.1632 | 3382.4523 | 4513.6006 | 6763.8971 | 13529.7870 | 136      | 77         | 7957.0586 | 3949.0330 | 2633.0244 | 1574.0251 | 1317.0158 |           |
| 2271.4794 | 2725.5738 | 3406.7154 | 4541.9514 | 6812.4235 | 13623.8397 | 137      | 76         | 7888.0237 | 3884.9855 | 2600.2041 | 1544.6086 | 1296.6867 |           |
| 2292.8285 | 2751.1928 | 3438.7391 | 4584.8497 | 6876.4710 | 13751.9347 | 138      | 75         | 7811.9109 | 3836.4591 | 2557.9752 | 1518.7332 | 1279.4912 |           |
| 2314.1777 | 2778.8118 | 3470.7829 | 4627.3481 | 6940.5185 | 13880.0296 | 139      | 74         | 7743.8159 | 3772.4116 | 2515.2768 | 1488.7094 | 1259.1421 |           |
| 2326.0172 | 2791.0192 | 3488.5221 | 4651.0271 | 6976.0370 | 13951.0668 | 140      | 73         | 7615.7210 | 3708.3641 | 2472.5785 | 1463.8557 | 1236.7934 |           |
| 2342.8585 | 2811.2267 | 3513.7841 | 4684.7097 | 7026.5609 | 14052.1144 | 141      | 72         | 7544.6839 | 3672.8456 | 2448.8995 | 1439.7426 | 1224.9529 |           |
| 2352.3620 | 2822.6330 | 3528.0394 | 4703.7168 | 7055.0716 | 14109.1359 | 142      | 71         | 7433.6362 | 3622.3217 | 2415.2169 | 1411.6845 | 1208.1121 |           |
| 2361.8656 | 2834.0373 | 3542.2948 | 4722.7240 | 7083.5823 | 14166.1574 | 143      | 70         | 7186.6147 | 3593.8110 | 2396.2098 | 1387.6041 | 1198.6085 |           |
| 2373.7051 | 2848.2447 | 3560.0541 | 4748.4030 | 7119.1009 | 14237.1945 | 144      | 69         | 7129.5933 | 3565.3003 | 2377.2026 | 1363.1538 | 1189.1049 |           |
| 2390.6484 | 2866.4648 | 3586.9169 | 4780.9866 | 7169.6247 | 14339.2422 | 145      | 68         | 7058.5561 | 3529.7817 | 2353.5236 | 1345.3945 | 1177.2654 |           |
| 2406.7219 | 2887.8648 | 3609.5792 | 4812.4365 | 7218.1511 | 14435.2949 | 146      | 67         | 6967.6695 | 3479.2670 | 2316.8440 | 1316.1988 | 1159.9376 |           |
| 2428.0710 | 2913.4838 | 3641.6029 | 4855.1348 | 7282.1986 | 14563.3899 | 147      | 66         | 686       |           |           |           |           |           |

# Fragment Masses

| +6 c ions | +5 c ions | +4 c ions | +3 c ions | +2 c ions  | +1 c ions  | Sequence | +1 z ions | +2 z ions | +3 z ions | +4 z ions | +5 z ions | +6 z ions |          |
|-----------|-----------|-----------|-----------|------------|------------|----------|-----------|-----------|-----------|-----------|-----------|-----------|----------|
| 2627.6090 | 2426.8990 | 4386.7694 | 5744.0087 | 8570.6095  | 12340.0317 | S        | 41        | 4242.7710 | 2121.8891 | 1414.9285 | 1061.4482 | 849.3600  | 707.9679 |
| 2873.6835 | 3448.2187 | 4310.0216 | 5746.3597 | 8619.0358  | 17237.0644 | P        | 46        | 4166.7668 | 2076.8761 | 1363.9176 | 1038.2962 | 851.9356  | 693.4626 |
| 2895.0328 | 3473.8377 | 4342.0453 | 5789.0580 | 8683.0833  | 17365.1594 | K        | 39        | 4058.6882 | 2029.8467 | 1353.5669 | 1015.4270 | 812.5431  | 677.2871 |
| 2916.3818 | 3499.4567 | 4374.0690 | 5831.7583 | 8747.1308  | 17493.2543 | K        | 38        | 3930.5912 | 1965.7993 | 1310.8686 | 983.4033  | 786.9241  | 655.9379 |
| 2928.2213 | 3513.8641 | 4391.8283 | 5855.4353 | 8782.8494  | 17564.2915 | A        | 37        | 3802.4963 | 1901.7518 | 1268.1703 | 951.3795  | 781.3051  | 634.5888 |
| 2949.5705 | 3539.2831 | 4423.8521 | 5898.1337 | 8846.6968  | 17892.3864 | K        | 36        | 3731.4592 | 1866.2332 | 1244.4912 | 933.8202  | 747.0977  | 622.7493 |
| 2966.0819 | 3559.0968 | 4448.8192 | 5931.1565 | 8896.2311  | 17791.4548 | V        | 35        | 3603.3642 | 1802.1857 | 1201.7929 | 901.5965  | 721.4787  | 601.4001 |
| 2977.9214 | 3573.3042 | 4466.3784 | 5954.8355 | 8931.7496  | 17862.4919 | A        | 34        | 3504.2958 | 1752.6515 | 1168.7701 | 876.8294  | 701.6850  | 584.8887 |
| 2989.2705 | 3598.9232 | 4498.4022 | 5997.5328 | 8996.7974  | 17990.5860 | K        | 33        | 3433.2587 | 1717.1330 | 1145.0911 | 859.0701  | 687.4576  | 573.0492 |
| 3015.4480 | 3618.3338 | 4522.8654 | 6029.8847 | 9044.3235  | 18087.6397 | P        | 32        | 3305.1627 | 1663.0656 | 1102.6626 | 827.6464  | 664.8686  | 561.7090 |
| 3036.7952 | 3643.9527 | 4554.6891 | 6072.5831 | 9108.3710  | 18215.7346 | K        | 31        | 3208.1110 | 1604.5591 | 1070.0418 | 802.7832  | 642.4280  | 535.5246 |
| 3058.1443 | 3669.5717 | 4586.7129 | 6115.2814 | 9172.4184  | 18343.8296 | K        | 30        | 3080.0160 | 1540.5116 | 1027.3435 | 770.7595  | 616.8090  | 514.1754 |
| 3089.9838 | 3683.7792 | 4604.4721 | 6138.9604 | 9207.9370  | 18414.8687 | A        | 29        | 2951.9210 | 1476.4642 | 984.8452  | 738.7357  | 591.1900  | 492.8262 |
| 3081.8234 | 3697.9886 | 4622.2314 | 6162.8395 | 9243.4556  | 18485.9039 | A        | 28        | 2880.8839 | 1440.9456 | 960.9662  | 720.9764  | 576.9826  | 480.9687 |
| 3103.1725 | 3723.6056 | 4654.2552 | 6205.3378 | 9307.5030  | 18613.9988 | K        | 27        | 2809.8468 | 1405.4270 | 937.2871  | 703.2172  | 562.7752  | 468.1472 |
| 3117.6779 | 3741.0120 | 4678.0132 | 6234.3485 | 9351.0190  | 18701.0308 | S        | 26        | 2681.7518 | 1341.3796 | 894.5888  | 671.1934  | 537.1562  | 447.7980 |
| 3129.5174 | 3755.2194 | 4693.7724 | 6258.0275 | 9386.5376  | 18772.0679 | A        | 25        | 2594.7198 | 1297.8635 | 865.5781  | 649.4354  | 519.7498  | 433.2927 |
| 3141.3569 | 3769.4268 | 4711.5317 | 6281.7065 | 9422.0562  | 18843.1051 | A        | 24        | 2523.6827 | 1262.3450 | 841.8991  | 631.6761  | 505.5424  | 421.4532 |
| 3162.7061 | 3795.0458 | 4743.5555 | 6324.4049 | 9486.1036  | 18971.2000 | K        | 23        | 2452.6456 | 1226.8264 | 818.2200  | 613.9169  | 491.3349  | 409.6137 |
| 3174.5456 | 3809.2532 | 4761.3147 | 6348.0839 | 9521.6222  | 19042.2371 | A        | 22        | 2324.5506 | 1162.7789 | 775.5217  | 581.8931  | 465.7159  | 388.2645 |
| 3191.0570 | 3829.0689 | 4788.0818 | 6381.1067 | 9571.1564  | 19141.3055 | V        | 21        | 2253.5135 | 1127.2804 | 751.8427  | 564.1338  | 451.5085  | 376.4250 |
| 3213.4061 | 3854.8850 | 4818.4056 | 6429.8049 | 9636.2639  | 19269.4096 | K        | 20        | 2154.4451 | 1077.7262 | 718.8199  | 539.3667  | 431.6948  | 359.9136 |
| 3228.5816 | 3874.0965 | 4842.3688 | 6456.1559 | 9683.7303  | 19368.4533 | P        | 19        | 2066.8661 | 1049.6793 | 696.1216  | 509.6460  | 409.9750  | 346.6044 |
| 3249.9308 | 3899.7155 | 4874.3925 | 6498.8543 | 9747.7778  | 19494.5482 | K        | 18        | 1929.2974 | 965.1523  | 643.7708  | 483.0798  | 386.8653  | 322.3690 |
| 3261.7703 | 3913.9229 | 4892.1518 | 6522.5333 | 9783.2963  | 19565.5853 | A        | 17        | 1801.2024 | 901.1048  | 601.0723  | 451.0561  | 361.0463  | 301.0398 |
| 3273.6098 | 3928.1303 | 4909.9111 | 6546.2123 | 9818.8149  | 19636.6225 | V        | 16        | 1730.1653 | 865.5863  | 577.3933  | 433.2968  | 346.8389  | 289.2003 |
| 3294.9590 | 3953.7493 | 4941.9348 | 6588.9107 | 9882.8623  | 19784.7174 | K        | 15        | 1659.1282 | 830.0677  | 553.7142  | 415.5375  | 332.6315  | 277.3608 |
| 3311.1344 | 3973.1599 | 4966.1980 | 6621.2616 | 9931.3687  | 19861.7702 | P        | 14        | 1624.0322 | 796.9202  | 541.6160  | 406.6160  | 307.0126  | 266.8446 |
| 3332.4836 | 3998.7789 | 4998.2217 | 6663.9599 | 9995.4362  | 19989.8651 | K        | 13        | 1433.9804 | 717.4939  | 478.6650  | 359.2506  | 287.6019  | 239.8361 |
| 3348.9950 | 4018.5925 | 5022.9888 | 6696.9827 | 10044.9704 | 20088.9336 | V        | 12        | 1305.8855 | 653.4464  | 435.9667  | 327.2268  | 261.9829  | 218.4870 |
| 3365.5064 | 4038.4062 | 5047.7560 | 6730.0055 | 10094.5046 | 20188.0020 | V        | 11        | 1206.8171 | 603.9122  | 402.9439  | 302.4597  | 242.1692  | 201.9756 |
| 3386.9666 | 4064.9662 | 5076.7797 | 6773.7038 | 10158.6631 | 20318.0969 | K        | 10        | 1107.7487 | 554.3780  | 369.9211  | 277.6926  | 222.3558  | 185.4642 |
| 3403.0310 | 4083.4358 | 5104.0429 | 6805.0548 | 10207.0785 | 20413.1497 | P        | 9         | 970.8537  | 499.8065  | 327.8827  | 246.0890  | 199.7660  | 164.1190 |
| 3424.3802 | 4109.0548 | 5136.0666 | 6847.7531 | 10271.1260 | 20541.2447 | K        | 8         | 882.6009  | 441.8041  | 294.8718  | 221.4057  | 177.3260  | 147.9396 |
| 3445.7293 | 4134.6737 | 5168.0904 | 6890.4514 | 10335.1735 | 20669.3396 | K        | 7         | 754.5060  | 377.7566  | 252.1735  | 189.3819  | 151.7070  | 126.5904 |
| 3457.5689 | 4148.8812 | 5185.8496 | 6914.1304 | 10370.6920 | 20740.3767 | A        | 6         | 626.4110  | 313.7091  | 209.4752  | 157.3582  | 126.0880  | 105.2412 |
| 3469.4084 | 4169.0986 | 5203.6080 | 6937.8906 | 10406.2106 | 20844.4139 | A        | 5         | 555.3739  | 278.1906  | 185.7961  | 139.5989  | 111.8806  | 93.4017  |
| 3485.5838 | 4182.4991 | 5227.8721 | 6970.1804 | 10454.7369 | 20908.4666 | P        | 4         | 484.8666  | 242.9760  | 162.1171  | 121.0960  | 97.0792   | 81.3022  |
| 3506.9330 | 4208.1181 | 5259.8959 | 7012.8587 | 10518.7844 | 21036.5616 | K        | 3         | 387.2840  | 184.1456  | 129.7662  | 97.5765   | 78.2626   | 65.3867  |
| 3528.2822 | 4233.7371 | 5291.9196 | 7055.5570 | 10582.8319 | 21164.6565 | K        | 2         | 258.1890  | 130.0982  | 87.0679   | 65.5527   | 52.6436   | 44.0376  |
| 3549.7953 | 4259.5529 | 5324.1893 | 7098.5834 | 10647.3714 | 21293.7355 | K        | 1         | 131.0941  | 66.0507   | 44.3695   | 33.5290   | 27.0246   | 22.6864  |

# Supplemental Figure 9

LCA SAU ButyrateTreatedHeLa H2B parking screen 150219111845 #2594-2636 RT: 53.63-54.34 AV: 5 NL: 4.865E  
F: FTMS + p NSI Full ms2 810.00@cid0.00 [825.00-2000.00]

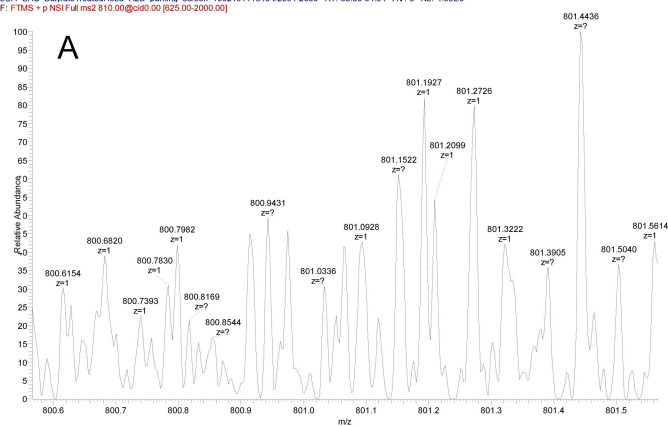

LCA SAU ButyrateTreatedHeLa H2B parking screen 150219111845 #2594-2636 RT: 53.63-54.34 AV: 5 NL: 5.156E  
F: FTMS + p NSI Full ms2 810.00@cid0.00 [825.00-2000.00]

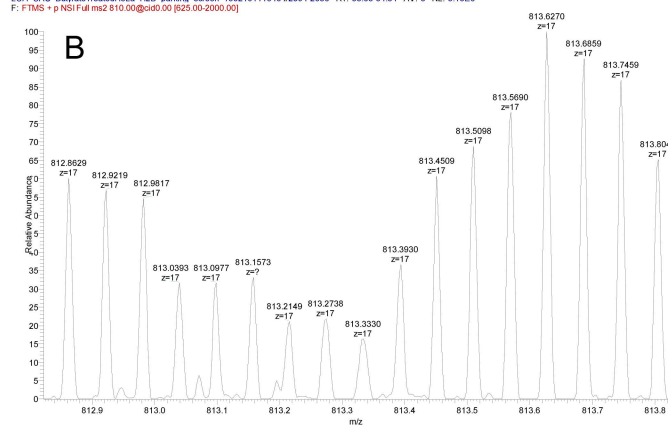

LCA SAU ButyrateTreatedHeLa H2B parking screen 150219111845 #2594-2636 RT: 53.63-54.34 AV: 5 NL: 6.166E  
F: FTMS + p NSI Full ms2 810.00@cid0.00 [825.00-2000.00]

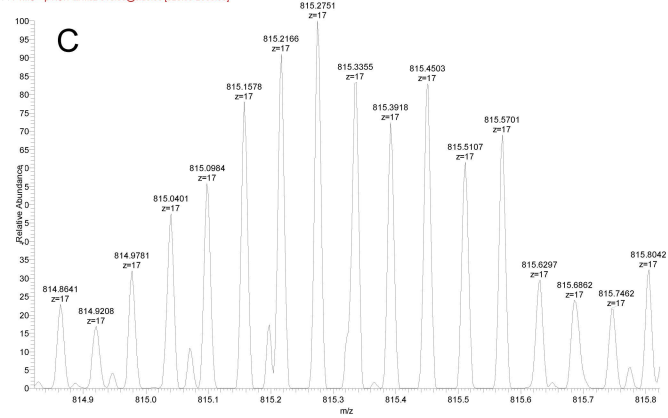

LCA SAU ButyrateTreatedHeLa H2B parking screen 150219111845 #2594-2636 RT: 53.63-54.34 AV: 5 NL: 6.165E  
F: FTMS + p NSI Full ms2 810.00@cid0.00 [825.00-2000.00]

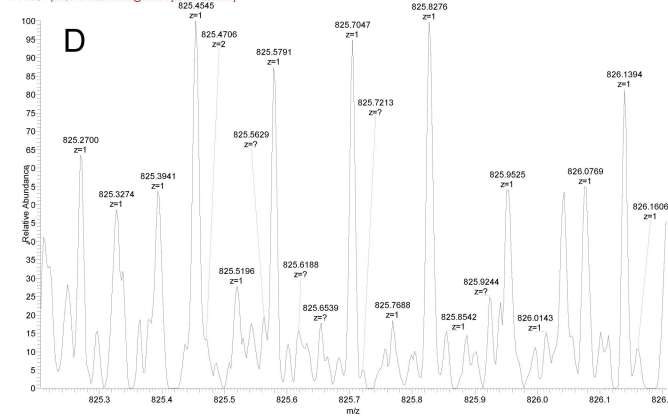

LCA SAU ButyrateTreatedHeLa H2B parking screen 150219111845 #2594-2636 RT: 53.63-54.34 AV: 5 NL: 1.856E  
F: FTMS + p NSI Full ms2 810.00@cid0.00 [825.00-2000.00]

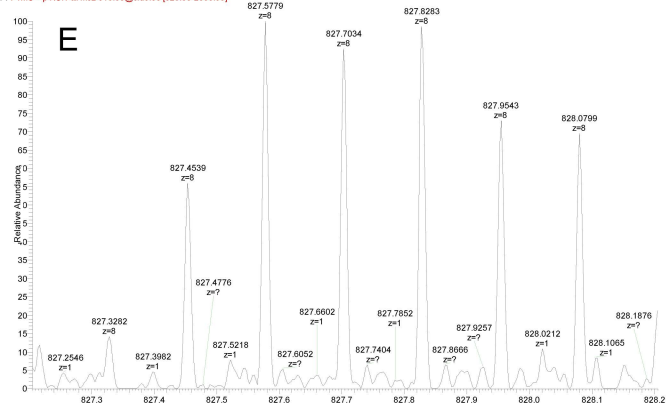

Supplemental Figure 10

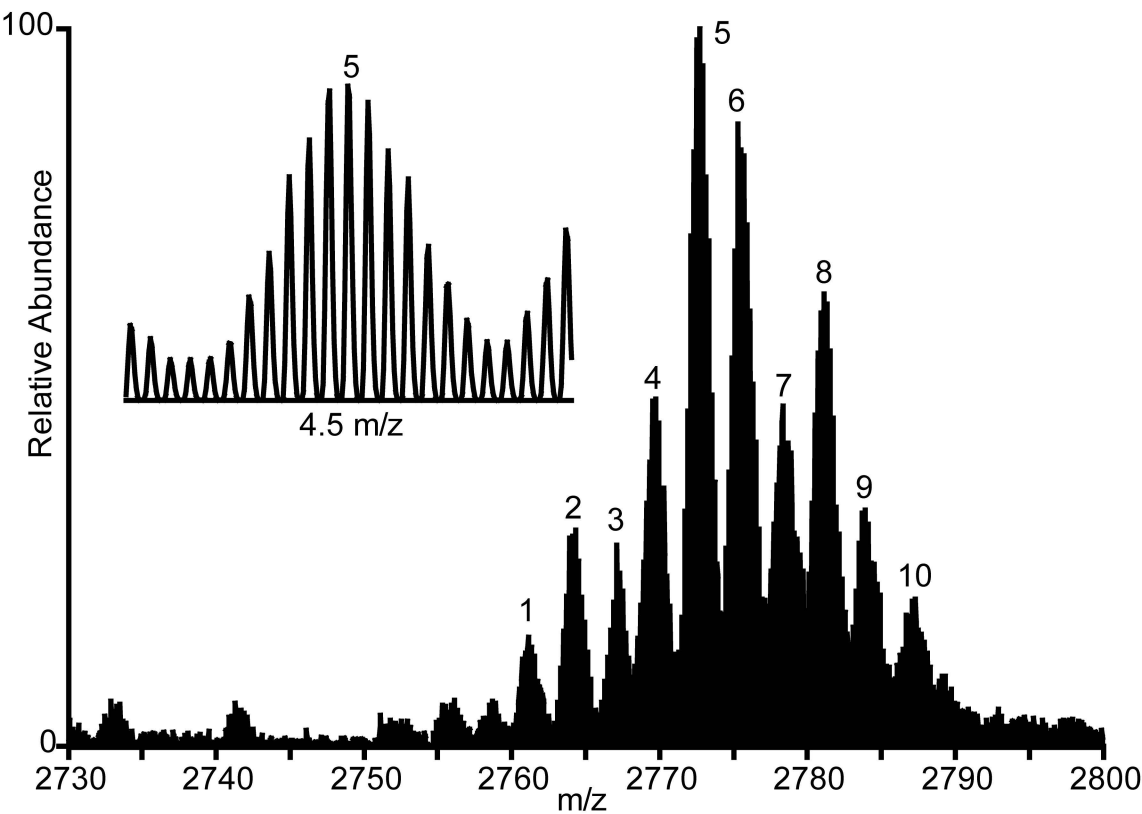

Supplemental Figure 11

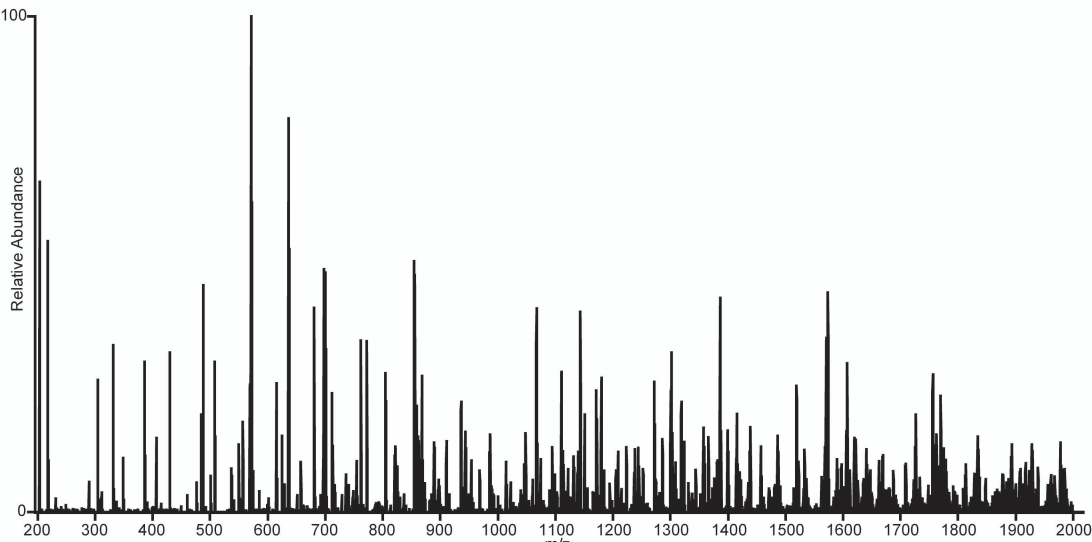

c-ions 30

G K K R K R S R K E S Y S V Y V Y K V L K Q V H P D T G I S

S K A M G I M N S F V N D I F E R I A G E A S R L A H Y N K

R S T I T S R E I Q T A V R L L L P G E L A K H A V S E G T

K A V T K Y T S S K

z<sup>+</sup>-ions

Supplemental Figure 12 A

A

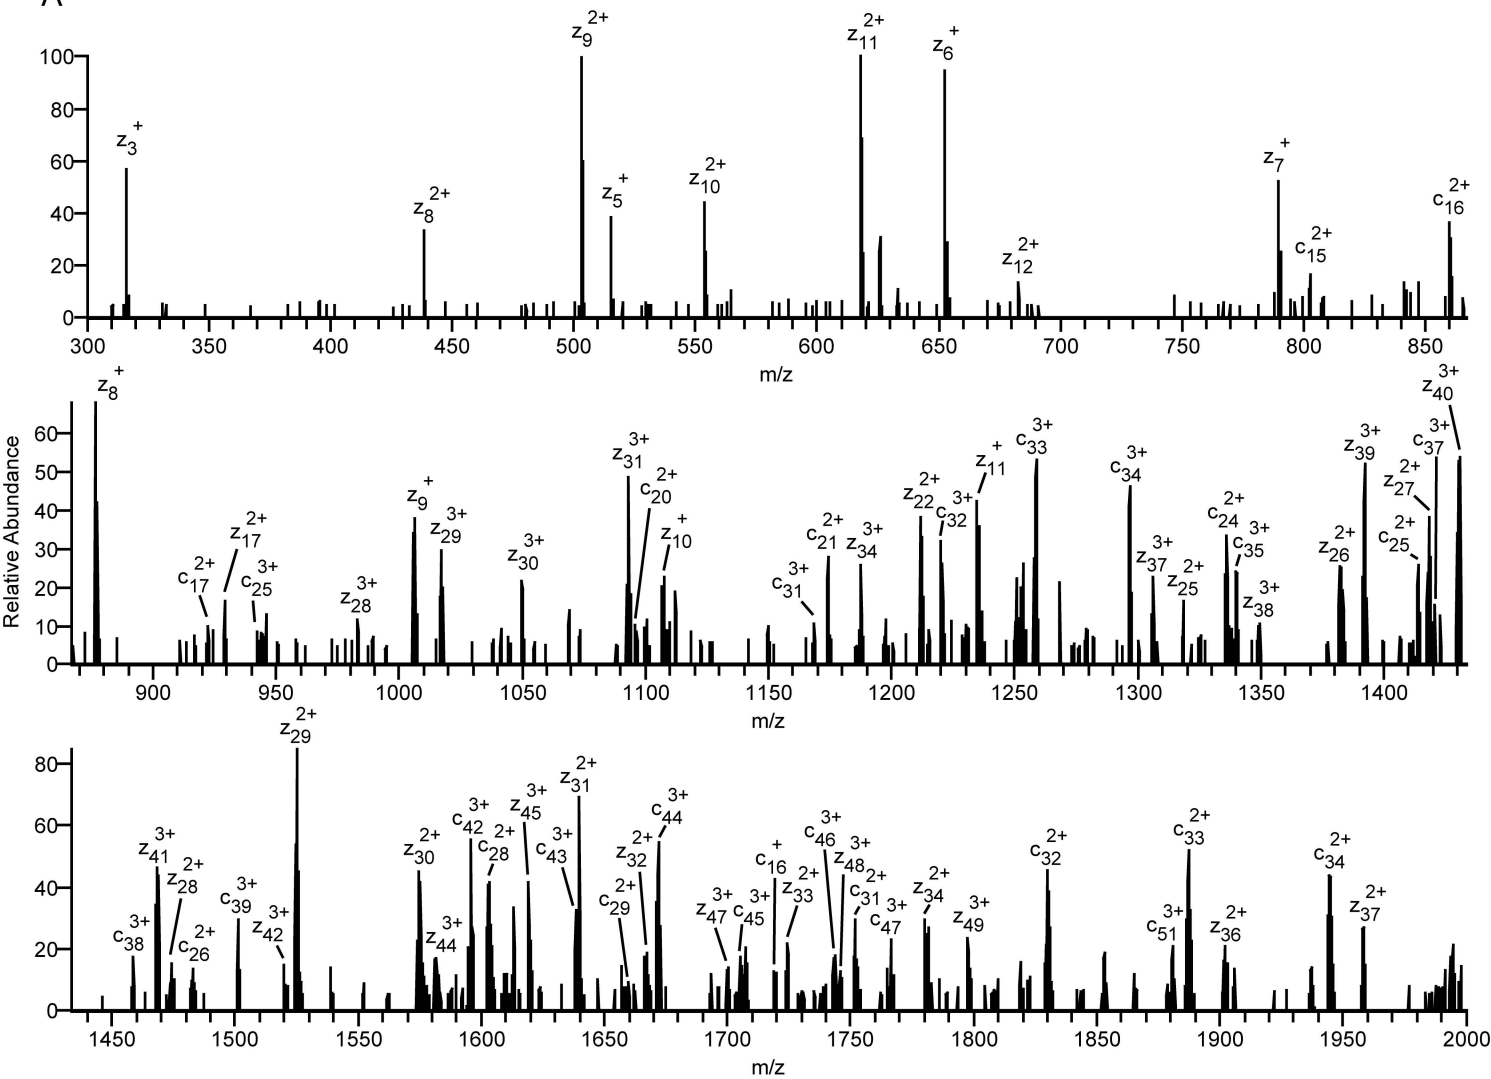

Y L T A E I L E L A G N A A R [D] N [K] K T [R] I I P [R] H [L] Q [L] A <sup>30</sup>  
 I [R] N [D] E [E] L [N] K [L] L [G] K [V] T [I] A [Q] G G V [L] P N I Q [A] V L L  
 P [K] K [T] E [S] H [H] K A [K] G K  
 c-ions  
 z-ions

Supplemental Figure 12 B

B

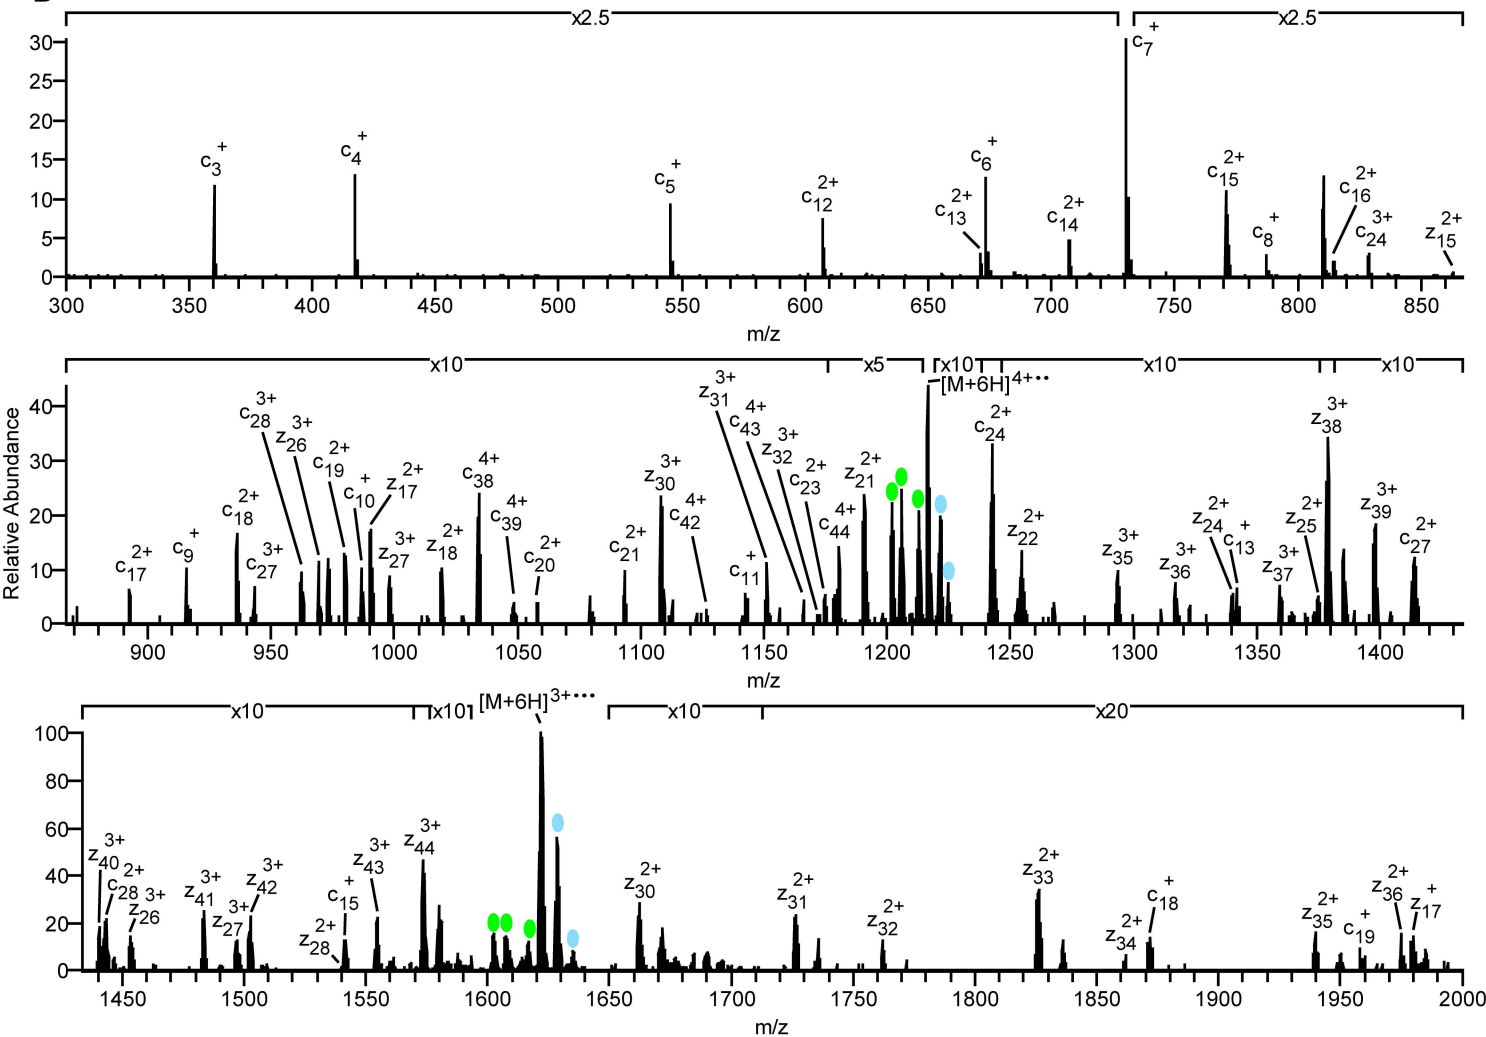

AC- $\alpha$ N-S <sup>c-ions</sup> [G][R][G][K][Q][G][G][K][A][R][A][K][A][K][S][R][S][S][R][A][G][L][Q][F][P][V][G][R][V] <sup>30</sup>

<sup>z<sup>+</sup>-ions</sup> [L][R][L][L][R][K][G][N][Y][A][E][R][V][G][A]



# Supplemental Figure 12 C

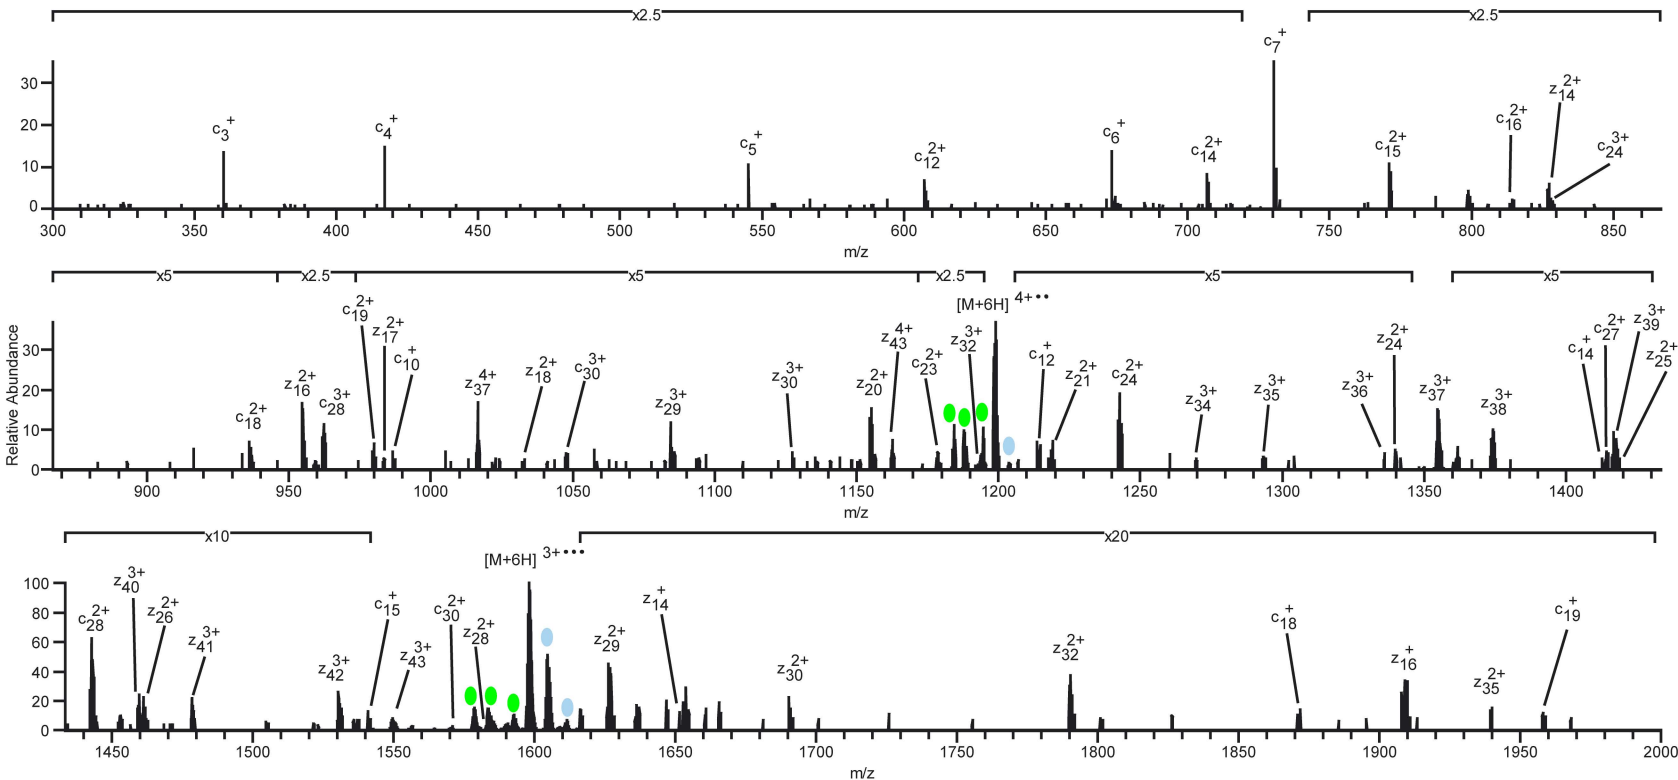

Ac- $\alpha$ N-S<sup>c-ions</sup>[G<sup>30</sup>[R[G[K][Q][G][G][K][A][R][A][K][A][K][S][R][S][S][R][A][G][L][Q][F][P][V][G][R][V]<sup>30</sup>

[H<sup>z<sup>+</sup>-ions</sup>[R][L][L][R][K][G][N][Y][A][E][R][V][G]



Supplemental Table 1

| Sequence                                                                      | Residues | AU        |
|-------------------------------------------------------------------------------|----------|-----------|
| SGRGKQGGKARAKAKSRSSRAGLQFPVGRVHRLLRKGNVAERVGAGAPVYMAAVLE-56                   | Intact   | 6.671E+10 |
| 57-YLTAEILELAGNAARDNKKTRII PRHLQLAIRNDEELNKLKGKVTIAQGGVLPNIQAVLLPKKTESHHKAKGK | 1-129    | 1.727E+07 |
| SGRGKQGGKARAKAKSRSSRA                                                         | 1-21     | 1.727E+07 |
| SGRGKQGGKARAKAKSRSSRAG                                                        | 1-22     | 2.666E+07 |
| SGRGKQGGKARAKAKSRSSRAGL                                                       | 1-23     | 1.189E+07 |
| SGRGKQGGKARAKAKSRSSRAGLQF                                                     | 1-25     | 1.255E+07 |
| SGRGKQGGKARAKAKSRSSRAGLQFPV                                                   | 1-28     | 3.040E+07 |
| SGRGKQGGKARAKAKSRSSRAGLQFPVGRVHRLLRK                                          | 1-36     | 1.812E+07 |
| SGRGKQGGKARAKAKSRSSRAGLQFPVGRVHRLLRK                                          | 1-37     | 6.719E+07 |
| SGRGKQGGKARAKAKSRSSRAGLQFPVGRVHRLLRKGNVA                                      | 1-40     | 1.484E+07 |
| SGRGKQGGKARAKAKSRSSRAGLQFPVGRVHRLLRKGNVAERVG                                  | 1-44     | 1.122E+08 |
| SGRGKQGGKARAKAKSRSSRAGLQFPVGRVHRLLRKGNVAERVG                                  | 1-45     | 5.379E+07 |
| SGRGKQGGKARAKAKSRSSRAGLQFPVGRVHRLLRKGNVAERVGAG                                | 1-46     | 3.876E+07 |
| SGRGKQGGKARAKAKSRSSRAGLQFPVGRVHRLLRKGNVAERVGAGA                               | 1-47     | 2.000E+07 |
| SGRGKQGGKARAKAKSRSSRAGLQFPVGRVHRLLRKGNVAERVGAGAPVYMAAVLE                      | 1-56     | 1.345E+07 |
| YLTAEILELAGNAARDNKKTRII PRHLQLAIRNDEELNKLKGKVTIAQGGVLPNIQAVLLPKKTESHHKAKGK    | 57-129   | 1.305E+07 |
| LAGNAARDNKKTRII PRHLQLAIRNDEELNKLKGKVTIAQGGVLPNIQAVLLPKKTESHHKAKGK            | 65-129   | 1.336E+07 |
| GNAARDNKKTRII PRHLQLAIRNDEELNKLKGKVTIAQGGVLPNIQAVLLPKKTESHHKAKGK              | 67-129   | 1.874E+07 |
| NAARDNKKTRII PRHLQLAIRNDEELNKLKGKVTIAQGGVLPNIQAVLLPKKTESHHKAKGK               | 68-129   | 6.762E+07 |
| AARDNKKTRII PRHLQLAIRNDEELNKLKGKVTIAQGGVLPNIQAVLLPKKTESHHKAKGK                | 69-129   | 1.024E+07 |
| DNKKTRII PRHLQLAIRNDEELNKLKGKVTIAQGGVLPNIQAVLLPKKTESHHKAKGK                   | 72-129   | 1.281E+07 |
| NKKTRII PRHLQLAIRNDEELNKLKGKVTIAQGGVLPNIQAVLLPKKTESHHKAKGK                    | 73-129   | 1.000E+08 |
| KTRII PRHLQLAIRNDEELNKLKGKVTIAQGGVLPNIQAVLLPKKTESHHKAKGK                      | 75-129   | 1.218E+07 |
| TRII PRHLQLAIRNDEELNKLKGKVTIAQGGVLPNIQAVLLPKKTESHHKAKGK                       | 76-129   | 1.689E+07 |
| GKVTIAQGGVLPNIQAVLLPKKTESHHKAKGK                                              | 98-129   | 2.310E+07 |
| KVTIAQGGVLPNIQAVLLPKKTESHHKAKGK                                               | 99-129   | 3.303E+07 |
| GGVLPNIQAVLLPKKTESHHKAKGK                                                     | 105-129  | 2.558E+07 |
| GVLQAVLLPKKTESHHKAKGK                                                         | 106-129  | 6.375E+07 |
| VLPNIQAVLLPKKTESHHKAKGK                                                       | 107-129  | 2.406E+07 |
| LPNIQAVLLPKKTESHHKAKGK                                                        | 108-129  | 3.407E+07 |
| PNIQAVLLPKKTESHHKAKGK                                                         | 109-129  | 6.237E+07 |
| QAVLLPKKTESHHKAKGK                                                            | 112-129  | 1.283E+07 |
| AVLLPKKTESHHKAKGK                                                             | 113-129  | 2.142E+07 |
| VLLPKKTESHHKAKGK                                                              | 114-129  | 1.395E+07 |
| LLPKKTESHHKAKGK                                                               | 115-129  | 1.435E+07 |
| PKKTESHHKAKGK                                                                 | 117-129  | 1.076E+07 |

## Supplemental Table 2

| Sequence                                                                                  | MH+ [Da]    | Cleavage site | Motif         | 15 min   | 30 min   | 1 hour   |
|-------------------------------------------------------------------------------------------|-------------|---------------|---------------|----------|----------|----------|
| SGRGKGGKARAKAKSRSSRAGLQFPVGRVHRLLRKGNVAERVG-44                                            | 14412.07723 | (intact)      | NA            | 9.36E+09 | 1.03E+10 | 1.10E+07 |
| 45-AGAPVYMAAVLEYLTAEILELAGNAARDNKKTRIIIPRHLQLAIRNDEELNKLKGVKTIAQGGVLPNIQAVLLPKKTESHHKAKGK | 9228.20502  | G44           | YAEVVG-AGAPV  | 2.96E+09 | 6.80E+09 | 2.18E+10 |
| AAVLEYLTAEILELAGNAARDNKKTRIIIPRHLQLAIRNDEELNKLKGVKTIAQGGVLPNIQAVLLPKKTESHHKAKGK           | 8538.84161  | M51           | GAPVYM-AAVLE  | 4.80E+06 | 2.05E+08 | 3.43E+08 |
| LAGNAARDNKKTRIIIPRHLQLAIRNDEELNKLKGVKTIAQGGVLPNIQAVLLPKKTESHHKAKGK                        | 7123.1231   | E64           | TAEILE-LAGNA  | 6.55E+06 | 4.21E+07 | 5.66E+07 |
| KKTRIIIPRHLQLAIRNDEELNKLKGVKTIAQGGVLPNIQAVLLPKKTESHHKAKGK                                 | 6240.61681  | N73           | NAARDN-KKTRI  | 9.46E+06 | 7.32E+07 | 5.55E+07 |
| RIIPRHLQLAIRNDEELNKLKGVKTIAQGGVLPNIQAVLLPKKTESHHKAKGK                                     | 5883.46855  | T76           | RDNKKT-RIIPR  | 4.55E+08 | 4.53E+08 | 3.25E+09 |
| IIPRHLQLAIRNDEELNKLKGVKTIAQGGVLPNIQAVLLPKKTESHHKAKGK                                      | 5727.33432  | R77           | DNKKT-RIIPR   | 3.14E+07 | 2.96E+07 | 1.77E+09 |
| RHLQLAIRNDEELNKLKGVKTIAQGGVLPNIQAVLLPKKTESHHKAKGK                                         | 5404.12777  | P80           | KTRIIP-RHLQL  | 6.34E+06 | 2.66E+06 | 1.89E+07 |
| HLQLAIRNDEELNKLKGVKTIAQGGVLPNIQAVLLPKKTESHHKAKGK                                          | 5248.01759  | R81           | TRIIPR-HLQLA  | 2.45E+08 | 4.08E+07 | 5.33E+08 |
| LQLAIRNDEELNKLKGVKTIAQGGVLPNIQAVLLPKKTESHHKAKGK                                           | 5110.95762  | H82           | RIIPR-HLQLA   | 3.14E+07 | 1.44E+06 | 2.42E+06 |
| LAIRNDEELNKLKGVKTIAQGGVLPNIQAVLLPKKTESHHKAKGK                                             | 4869.84071  | Q84           | IIPRHLQ-LAIRN | 2.64E+09 | 7.84E+09 | 1.46E+10 |
| AIRNDEELNKLKGVKTIAQGGVLPNIQAVLLPKKTESHHKAKGK                                              | 4756.73387  | L85           | PRHLQL-AIRND  | 8.54E+08 | 1.54E+09 | 5.62E+09 |
| IRNDEELNKLKGVKTIAQGGVLPNIQAVLLPKKTESHHKAKGK                                               | 4685.69103  | A86           | RHLQLA-IRNDE  | 9.27E+08 | 1.23E+09 | 4.39E+10 |
| RNDEELNKLKGVKTIAQGGVLPNIQAVLLPKKTESHHKAKGK                                                | 4572.5985   | I87           | HLQLAI-RNDEE  | 1.72E+08 | 7.91E+07 | 1.35E+08 |
| DEELNKLKGVKTIAQGGVLPNIQAVLLPKKTESHHKAKGK                                                  | 4302.45079  | N89           | QLAIRN-DEELN  | 3.71E+08 | 7.17E+07 | 2.06E+08 |
| EELNKLKGVKTIAQGGVLPNIQAVLLPKKTESHHKAKGK                                                   | 4187.43615  | D90           | LAIRND-EELNK  | 1.18E+07 | 1.25E+08 | 1.09E+07 |
| KLLGKVTIAQGGVLPNIQAVLLPKKTESHHKAKGK                                                       | 3702.2246   | N94           | NDEELN-KLLGK  | 4.53E+07 | 1.42E+07 | 3.78E+07 |
| LLGKVTIAQGGVLPNIQAVLLPKKTESHHKAKGK                                                        | 3574.13171  | K95           | DEELNK-LLGKV  | 1.99E+07 | 8.87E+06 | 4.01E+07 |
| LGKVTIAQGGVLPNIQAVLLPKKTESHHKAKGK                                                         | 3461.05053  | L96           | EELNKL-LGKVT  | 4.41E+06 | 4.34E+06 | 1.06E+07 |
| GKVTIAQGGVLPNIQAVLLPKKTESHHKAKGK                                                          | 3347.97448  | L97           | ELNKL-LGKVTI  | 2.34E+08 | 3.98E+08 | 3.20E+09 |
| KVTIAQGGVLPNIQAVLLPKKTESHHKAKGK                                                           | 3290.94445  | G98           | EELNKL-LGKVT  | 1.30E+09 | 1.68E+09 | 1.07E+10 |
| VTIAQGGVLPNIQAVLLPKKTESHHKAKGK                                                            | 3162.84833  | K99           | NKLLGK-VTIAQ  | 2.59E+07 | 3.20E+06 | 3.57E+07 |
| TIAQGGVLPNIQAVLLPKKTESHHKAKGK                                                             | 3063.78051  | V100          | KLLGK-VTIAQ   | 3.42E+07 | 2.19E+07 | 3.78E+07 |
| IAQGGVLPNIQAVLLPKKTESHHKAKGK                                                              | 2962.73119  | T101          | LLGKVT-IAQGG  | 3.34E+08 | 5.07E+08 | 2.07E+09 |
| AQGGVLPNIQAVLLPKKTESHHKAKGK                                                               | 2849.65038  | I102          | LGKVTI-AQGGV  | 3.01E+07 | 2.47E+07 | 3.21E+07 |
| QGGVLPNIQAVLLPKKTESHHKAKGK                                                                | 2778.61279  | A103          | GKVTIA-QGGVL  | 2.27E+08 | 1.46E+08 | 6.37E+08 |
| GGVLPNIQAVLLPKKTESHHKAKGK                                                                 | 2650.5523   | Q104          | KVTIAQ-GGVLP  | 6.98E+07 | 5.35E+07 | 1.82E+07 |
| GVLPNIQAVLLPKKTESHHKAKGK                                                                  | 2593.5296   | G105          | VTIAQ-GVLPN   | 4.91E+07 | 3.38E+07 | 7.35E+07 |
